# Supplementary material
Source: PubMed Central journal article supplement (PMC4811189)
Supplement: NIHMS770496-supplement-SI.pdf [file NIHMS770496-supplement-SI.pdf]

Supporting Information

© Wiley-VCH 2013

69451 Weinheim, Germany

**Nickel-Catalyzed Enantioselective Arylation of Pyridinium Ions:  
Harnessing an Iminium Ion Activation Mode\*\***

*Stephen T. Chau, J. Patrick Lutz, Kevin Wu, and Abigail G. Doyle\**

anie\_201303994\_sm\_miscellaneous\_information.pdf

|      |                                                  |      |
|------|--------------------------------------------------|------|
| I.   | General Information.....                         | S-2  |
| II.  | General Procedures.....                          | S-4  |
| III. | Additional Optimization Experiments .....        | S-11 |
| IV.  | Characterization of Compounds <b>2a-2p</b> ..... | S-13 |
| V.   | NMR Spectra .....                                | S-45 |
| VI.  | Crystallographic Data .....                      | S-88 |

## I. General Information

**General Procedures.** Unless otherwise noted, reactions were performed with rigorous exclusion of air and moisture. Nitrogen-flushed stainless steel cannulae or plastic syringes were used to transfer air- and moisture-sensitive reagents. All reactions forming products **2a-2p** can be run without the use of a glovebox with vacuum evacuation and refilling of glassware with nitrogen. Solvent was freshly distilled/degassed prior to use unless otherwise noted. Reactions were monitored by thin-layer chromatography (TLC) on EMD Silica Gel 60 F254 plates, visualizing with UV-light (254 nm) fluorescence quenching, and KMnO<sub>4</sub> stain. Organic solutions were concentrated under reduced pressure using a rotary evaporator (25 °C, <50 torr). Automated column chromatography was performed using pre-packed silica gel cartridges on a Biotage SP4 (40-53 μm, 60 Å). Sigma Aldrich silica gel technical grade 60 Å, 230-400 mesh was buffered with 5% Et<sub>3</sub>N. Iatrobeds 6RS-8060 was buffered with 5% Et<sub>3</sub>N and used as indicated. SiliaFlash® Irregular silica gel P60 (40-63 μm, 230-400 mesh) was used as received.

**Materials.** Commercial reagents were purchased from Sigma Aldrich, Acros, Alfa Aesar, Strem, or TCI, and used as received with the following exceptions. Diethyl ether (Et<sub>2</sub>O), dichloromethane (CH<sub>2</sub>Cl<sub>2</sub>), tetrahydrofuran (THF), and toluene were dried by passing through activated alumina columns; acetonitrile (CH<sub>3</sub>CN) was dried by passing through a column of activated molecular sieves. Nickel(II) chloride glyme was purchased from Strem and stored at room temperature in a N<sub>2</sub>-filled glovebox. Nickel(II) bromide diglyme was purchased from Sigma Aldrich and stored at room temperature in a N<sub>2</sub>-filled glovebox. For storage purposes all zinc reagents, ligands, and nickel sources were kept in the glovebox protected from moisture and air.

**Instrumentation.** Proton nuclear magnetic resonance (<sup>1</sup>H NMR) spectra and carbon nuclear magnetic resonance (<sup>13</sup>C NMR) spectra were recorded on a Bruker 500 AVANCE spectrometer (500 and 125 MHz, respectively). Chemical shifts for protons are reported in parts per million downfield from tetramethylsilane and are referenced to residual protium in the NMR solvent (CDCl<sub>3</sub> = δ 7.26 ppm, MeOD = δ 3.35 ppm, C<sub>6</sub>D<sub>6</sub> = δ 7.16 ppm). Chemical shifts for carbon are reported in parts per million downfield from tetramethylsilane and are referenced to the carbon resonances of the solvent residual peak (CDCl<sub>3</sub> = δ 77.00 ppm, MeOD = δ 49.30 ppm, C<sub>6</sub>D<sub>6</sub> = δ 128.06 ppm). <sup>19</sup>F spectra (282 MHz) and <sup>31</sup>P spectra (121 MHz) were recorded on a Bruker NB 300 spectrometer; chemical shifts are reported in parts per million. NMR data are represented as follows: chemical shift (δ ppm), multiplicity (s = singlet, d = doublet, t = triplet, q = quartet, m = multiplet), coupling constant in Hertz (Hz), integration. High-resolution mass spectra were obtained on an Agilent 6220 using electrospray ionization time-of-flight (ESI-TOF). FT-IR spectra were recorded on a Perkin-Elmer Spectrum 100 and are reported in terms of frequency of absorption (cm<sup>-1</sup>). Reversed-phase liquid chromatography/mass spectrometry (LC/MS) was performed on an Agilent 1260 Infinity analytical LC and Agilent 6120 Quadrupole LC/MS system, using electrospray ionization/atmospheric-pressure chemical ionization (ESI/APCI), and UV detection at 254

and 280 nm. High-performance liquid chromatography (HPLC) was performed on an Agilent 1200 series instrument with a binary pump and a diode array detector, using Chiralpak OD-H (25 cm x 0.46 cm) and Chiralpak AD-H (25 cm x 0.46 cm) columns. SFC separation performed on a Berger Analytical SFC System equipped with a dual pump (FCM1200), an auto sampler (ALS3100), a column oven (TCM200) and a diode array detector (DAD4100) using a Chiralpak IA (15 x 0.46cm) column. Single crystals suitable for X-ray diffraction were coated with polyisobutylene oil, transferred to a nylon loop and then quickly transferred to the goniometer head of a Bruker APEX2 Duo diffractometer equipped with molybdenum ( $\lambda = 0.71073 \text{ \AA}$ ) and copper ( $\lambda = 1.54184 \text{ \AA}$ ) X-ray tubes. Preliminary data revealed the crystal system. A hemisphere routine or optimization using COSMO was used for data collection and determination of lattice constants. The space group was identified, and the data were processed using the Bruker SAINT+ program and corrected for absorption using SADABS. The structures were solved using the SIR92 software suite, completed by subsequent Fourier synthesis and refined by full-matrix least-squares procedures. Optical rotations were taken with a Perkin Elmer 341 polarimeter Na/Hal lamp with a .998 dm/1mL cell in spectral grade  $\text{CHCl}_3$ .



## II. General Procedure

### 0.05 mmol scale:

To a 10-mL glass vial charged with ligand **L7** (2.9 mg, 0.006 mmol, 0.12 equiv.) in THF (0.5 mL) at rt, was added nickel(II) bromide diglyme (1.8 mg, 0.005 mmol, 0.1 equiv.) in THF (0.5 mL) and 4-F-PhZnBr solution (0.3 M in THF, 0.66 mL, 2 mmol, 4 equiv.) in a nitrogen filled glovebox. The vial was sealed with a plastic cap lined with a rubber septum, wrapped with electrical tape and removed from the glovebox.

To a separate 10-mL glass vial equipped with a stir bar were added 2 mL of THF, 4-methoxypyridine (5.45 mg, 0.05 mmol, 1 equiv.) and phenyl chloroformate (0.025 mL, 0.2 mmol, 4 equiv.) at 0 °C, and the solution was stirred for 15 min at this temperature. The resulting white slurry was then cooled to -78 °C and the cocktail of ligand, nickel and aryl zinc bromide solution was added dropwise. Reaction was stirred overnight and allowed to warm to rt. The reaction was quenched with 2 mL of 1 M HCl and stirred for 20 min, extracted with diethyl ether (2 x 5 mL), filtered through a silica gel plug, dried over MgSO<sub>4</sub> and concentrated *in vacuo*. The crude material was evaluated via <sup>19</sup>F NMR versus an internal standard of *p*-difluorobenzene and chiral HPLC to determine yield and % ee respectively.

### 0.5 mmol scale:

To a 25-mL glass vial was added ligand **L7** (28.5 mg, 0.06 mmol, 0.12 equiv.) in 5 mL of THF. To this solution was added nickel(II) bromide diglyme (17.6 mg, 0.05 mmol, 0.1 equiv) in 5 mL of THF (allowed to stir 15 min in a separate glass vial with a stir bar until metal completely dissolves to give a solution that is purple in color) and arylzinc halide (0.3 M in THF, 6.66 mL, 2 mmol, 4 equiv.) in a nitrogen-filled glovebox. Upon addition of the arylzinc halide solution to the ligand and nickel source the solution immediately turned a dark brown color. The 25-mL glass vial was sealed with a plastic cap lined with a rubber septum, wrapped with electrical tape and removed from the glovebox.

Separately, a 50-mL Schlenk flask armed with a 1-inch bar-shaped stir bar was flame dried under vacuum and charged with nitrogen. To this flask were added 20 mL of THF, 4-methoxypyridine (54.5 mg, 0.5 mmol, 1 equiv.) and phenyl chloroformate (0.250 mL, 2 mmol, 4 equiv.) at 0 °C. Upon addition of phenyl chloroformate, a thick white slurry immediately formed and the solution was allowed to stir for an additional 15 min at 0 °C. The reaction was cooled to -78 °C and to the Schlenk flask was added the freshly prepared cocktail of ligand, nickel and arylzinc halide solution dropwise over 20 min. The reaction was allowed to warm to -40 °C and stirred overnight at this constant temperature unless otherwise noted. The reaction was quenched with 30 mL of 1 M HCl and stirred for 20 min at rt. The resulting mixture was diluted with diethyl ether, and the aqueous layer was extracted with diethyl ether (3 x 10 mL) and washed with sat. NaHCO<sub>3</sub> (2 x 10 mL) and brine (2 x 10 mL). The combined organic layers were dried over MgSO<sub>4</sub> and the filtrate was concentrated *in vacuo*. The crude mixture was purified with silica gel (SiO<sub>2</sub>) column chromatography (buffered with 5% Et<sub>3</sub>N as noted, 3:1, 2:1 hexanes: EtOAc unless otherwise stated) and the title compound was obtained as an oil unless otherwise stated.

### Formation of Aryl Zinc Halide Solutions:

Method A<sup>1</sup>: To a 250-mL 3-neck round-bottomed flask equipped with a stir bar, nitrogen inlet and a thermocouple was added aryl bromide (35 mmol, 1 equiv.) in THF (70 mL) at rt. The solution was cooled to –100 °C and *n*-BuLi (2.0 M in hexanes, 17.5 mL, 35 mmol, 1 equiv.) was added dropwise, while maintaining the solution at –100 to –105 °C. After complete addition, the mixture was stirred for an additional 20 min at –100 °C and then warmed to –78 °C. At this temperature, a solution of ZnBr<sub>2</sub> (8.7 g, 38.5 mmol, 1.1 equiv.) in THF (12.5 mL) was added dropwise. After complete addition the flask was warmed to rt, cannulated into a vial and stored in a nitrogen glovebox.

Method B<sup>2</sup>: A 100-mL round-bottomed flask equipped with a stir bar was charged with LiCl (1.5 equiv.) and ZnCl<sub>2</sub> (1.2 equiv.) and heated with a heatgun under vacuum (0.1 torr) for 5 min. Mg dust (1.6 equiv.) and THF (12 mL at 8 mmol scale) was activated with DIBAL-H (1.0 M in hexanes, 0.01 equiv.) at 0 °C. Bubbling immediately occurred and after 5 min of stirring, aryl bromide (1 equiv.) was added. The resulting solution was warmed to rt and stirred for 3 h, diluted to 0.3 M with THF, cannulated into a vial, and stored in a nitrogen glovebox.

### Preparation of Nickel Methallylchloride Dimer<sup>3</sup>:

A 200-mL Schlenk flask and Teflon stir bar were oven dried and brought into a nitrogen-filled glovebox. There, the flask was charged with anhydrous, degassed THF (70 mL), then Ni(COD)<sub>2</sub> (1.375 g, 5 mmol). The sides were rinsed with THF (10 mL). The flask was carefully sealed and then *quickly* removed from the glovebox and put into a –78 °C cooling bath. After cooling, methallyl chloride (0.54 mL, 5.5 mmol) was added via syringe. The bath was allowed to expire slowly. The mixture went from bright yellow to green-brown to dark red as it warmed. After warming to 0 °C, the THF was removed by vacuum via a Schlenk line, leaving a red-orange solid. The flask was brought to the glovebox, and the material was redissolved in anhydrous, degassed toluene and filtered through Celite (prepared according to the RajanBabu method). The resulting dark orange solution was concentrated to a flaky orange powder (0.55 g, 74% yield).

---

<sup>1</sup> Jensen, A.E.; Kneisel, F.; Knochel, P. *Org. Synth.* **2004**, *Coll. Vol 10*, 391.

<sup>2</sup>(a) Schade, M.A.; Manolikakes, G.; Knochel, P. *Org. Lett.* **2010**, *12*, 3648-3650. (b) Piller, F. M.; Metzger, A.; Schade, M. A; Haag, B. A; Gavryushin, A.; Knochel, P. *Chem. Eur. J.* **2009**, *15*, 7192–202.

<sup>3</sup> (a) Shim, C. B.; Kim, Y. H.; Lee, B. Y.; Dong, Y.; Yun, H. *Organometallics* **2003**, *22*, 4272–4280. (b) Smith, C. R.; Zhang, A.; Mans, D. J.; RajanBabu, T. V. *Org. Synth.* **2008**, *85*, 248-266.

#### Preparation of gram-scale reaction under benchtop conditions:

To a 250-mL round bottom flask was added ligand **L7** (143 mg, 0.30 mmol, 0.06 equiv.) evacuated and refilled with N<sub>2</sub> then added 50-mL of THF at rt. To the ligand solution was added nickel(II) bromide diglyme (88 mg, 0.250 mmol, 0.05 equiv) in 50 mL of THF (allowed to stir 15 min in a N<sub>2</sub> purged 50-mL pear shaped flask containing a septum armed with a stir bar, stirred until metal completely dissolves to give a solution that is purple in color) then arylzinc halide (0.3 M in THF, 66.7 mL, 20 mmol, 4 equiv.) was added via syringe. Upon addition of the arylzinc halide solution to the ligand and nickel source the solution immediately turned a dark brown color.

Separately, a 1 L round bottom flask armed with a 2-inch bar-shaped stir bar was flame dried under vacuum and charged with nitrogen. To this flask were added 100 mL of THF, 4-methoxypyridine (0.508 mL, 5 mmol, 1 equiv.) and phenyl chloroformate (2.509 mL, 20 mmol, 4 equiv.) at 0 °C. Upon addition of phenyl chloroformate, a thick white slurry immediately formed and the solution was allowed to stir for an additional 15 min at 0 °C. The reaction was cooled to –78 °C and to the round bottom flask was added the freshly prepared cocktail of ligand, nickel and arylzinc halide solution dropwise over 20 min and monitored with a thermocouple. The reaction was allowed to warm to –40 °C and stirred overnight at this constant temperature. The reaction was quenched with 30 mL of 1 M HCl and stirred for 20 min at rt. The resulting mixture was diluted with diethyl ether, and the aqueous layer was extracted with diethyl ether (3 x 30 mL) and washed with sat. NaHCO<sub>3</sub> (30 mL) and brine (2 x 10 mL). The combined organic layers were dried over MgSO<sub>4</sub> and the filtrate was concentrated *in vacuo*. The crude mixture was purified with silica gel (SiO<sub>2</sub>) column chromatography (3:1, 2:1 hexanes: EtOAc unless otherwise stated) providing **2a** (1.14 g, 73% yield) in 93% ee.

#### Preparation of racemates 2a-2p:

Racemic standards were developed using racemic (±)Monophos instead of **L7** under otherwise identical reaction conditions for compounds **2a-2p** under 0.05 mmol scale.

## Ligand (L7) Synthesis:

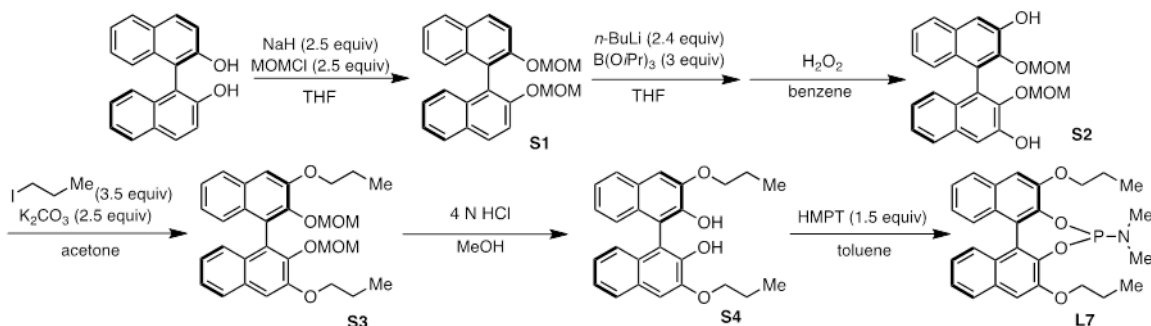

**(R)-2,2'-bis(methoxymethoxy)-1,1'-binaphthalene (S1)**<sup>4</sup>: A flame-dried, 250-mL round-bottomed flask equipped with a stir bar was charged with (*R*)-BINOL (10 g, 35 mmol, 1.0 equiv.) in dry THF (30 mL). The reaction mixture was cooled to 0 °C and sodium hydride (3.5 g, 88 mmol, 2.5 equiv.) was added portionwise to give a yellow solution. The reaction mixture was warmed to rt and allowed to stir 1 h. The reaction mixture was cooled to 0 °C and MOMCl (6.6 mL, 88 mmol, 2.5 equiv.) was added via syringe. The reaction mixture was allowed to stir at 0 °C for 10 min, then warmed to rt and allowed to stir overnight. The reaction was quenched with sat. NH<sub>4</sub>Cl (40 mL) and diluted with water (40 mL). The resulting mixture was extracted with Et<sub>2</sub>O (3 x 30 mL) and the combined organic layers were dried with MgSO<sub>4</sub> and filtered. The filtrate was concentrated *in vacuo* and the crude product mixture was purified using flash chromatography with SiO<sub>2</sub> (rf=0.60 in 4:1 hex:EtOAc) to give the product as a beige solid (7.3 g, 20 mmol, 56%).

**(R)-2,2'-bis(methoxymethoxy)-[1,1'-binaphthalene]-3,3'-diol (S2)**<sup>5</sup>: A flame-dried, 100-mL recovery flask equipped with a stir bar was charged with **S1** (3.0 g, 8.0 mmol, 1.0 equiv.) in dry THF (30 mL). The reaction mixture was cooled to -78 °C and fresh *n*-BuLi (2.0 M in hexanes, 9.6 mL, 19 mmol, 2.4 equiv.) was added to the stirring solution, and the solution was allowed to stir at 0 °C for 1 h. The solution was cooled to -78 °C and triisopropyl borate (5.6 mL, 24 mmol, 3.0 equiv.) was added dropwise. The reaction mixture was warmed to rt and stirred overnight, then concentrated *in vacuo* to give an orange solid. Benzene (40 mL) was added and the solution was cooled to 0 °C. Aqueous hydrogen peroxide (30 wt%, 6 mL) was added, and the solution was allowed to stir at 0 °C for 2 h. The reaction mixture was diluted with water (40 mL) and extracted with Et<sub>2</sub>O (3 x 30 mL). The combined organic portions were dried with MgSO<sub>4</sub> and filtered, and the filtrate was concentrated *in vacuo* to give an orange oil. Hexanes were added to the oil and a solid precipitated from solution, and the hexanes were then removed *in vacuo*. The addition of hexanes to precipitate product followed by removing the hexanes *in vacuo* was carried out a total of three times to give an orange solid (2.9 g, 7.2 mmol, 90%) that was carried directly on to the next step of the synthesis without purification. Fresh *n*-BuLi was required for reproducible results.

**(R)-2,2'-bis(methoxymethoxy)-[1,1'-binaphthalene]-3,3'-diol (S3)**<sup>5</sup>: A 100-mL recovery flask equipped with a stir bar was charged with **S2** (2.9 g, 7.2 mmol, 1.0 equiv.) dissolved in acetone (10 mL). K<sub>2</sub>CO<sub>3</sub> (2.5 g, 18 mmol, 2.5 equiv.) and 1-iodopropane (2.5 mL, 25 mmol, 3.5 equiv.) were added to the solution. The flask was capped with a reflux condenser and the solution was stirred at reflux overnight. The reaction was quenched with water (40 mL) and diluted with Et<sub>2</sub>O (40 mL), then extracted with Et<sub>2</sub>O

<sup>4</sup> Wu, T. R.; Shen, L.; Chong, J. M. *Org. Lett.* **2004**, *6*, 2701-2704.

<sup>5</sup> Ooi, T.; Kameda, M.; Maruoka, K.; *J. Am. Chem. Soc.* **2003**, *125*, 5139-5151.

(4x30 mL), dried with MgSO<sub>4</sub>, and filtered. The filtrate was concentrated *in vacuo* to give an orange solid. The crude product was purified using flash chromatography with SiO<sub>2</sub> (rf=0.53 in 4:1 hex:EtOAc) to give the product as a yellow oil (1.3 g, 2.6 mmol, 36%).

**(R)-3,3'-dipropoxy-[1,1'-binaphthalene]-2,2'-diol (S4):** A 100-mL recovery flask was charged with **S3** (1.3 g, 2.6 mmol) dissolved in MeOH (30 mL). Aqueous HCl (4 M, 5 mL) was added, and the reaction mixture was allowed to stir at rt for 36 h. The reaction mixture was diluted with water (40 mL) and Et<sub>2</sub>O (30 mL), then extracted with Et<sub>2</sub>O (3 x 30 mL). The combined organic portions were dried with MgSO<sub>4</sub> and filtered, and the filtrate was concentrated *in vacuo* to give a yellow solid. The crude product mixture was purified using flash chromatography with SiO<sub>2</sub> (rf=0.36 in 4:1 hex:EtOAc) to give the product as a crystalline, beige solid (0.78 g, 1.9 mmol, 76%).

**(R)-N,N-dimethyl-2,6-dipropoxydinaphtho[2,1-d':2'-f][1,3,2]dioxaphosphepin-4-amine (L7)<sup>6</sup>:** A 50-mL round-bottomed flask equipped with a stir bar was charged with **S4** (0.78 g, 1.9 mmol, 1.0 equiv) in toluene (30 mL). HMPT (0.53 mL, 2.9 mmol, 1.5 equiv.) was added, and the reaction mixture was allowed to stir for 5 h at rt. The toluene was removed *in vacuo* to give a white solid that was purified using flash chromatography with SiO<sub>2</sub> (rf=0.63 in 4:1 hex:EtOAc) to give the product as a white, crystalline solid (0.77 g, 1.6 mmol, 83%).

**<sup>1</sup>H NMR (500 MHz, CDCl<sub>3</sub>):** δ 7.77 (dd, *J* = 8.3, 5.0 Hz, 2H), 7.40 – 7.33 (m, 2H), 7.31 (d, *J* = 9.4 Hz, 2H), 7.24 (d, *J* = 12.2 Hz, 1H), 7.10 (dddd, *J* = 16.8, 8.3, 6.7, 1.3 Hz, 3H), 4.17 (dddt, *J* = 39.5, 29.8, 9.0, 6.5 Hz, 4H), 2.53 (d, *J* = 9.2 Hz, 6H), 1.98 (qd, *J* = 7.5, 3.9 Hz, 4H), 1.15 (t, *J* = 7.4 Hz, 3H), 1.11 (t, *J* = 7.4 Hz, 3H).

**<sup>13</sup>C NMR (125 MHz, CDCl<sub>3</sub>):** δ 150.59 (d, *J* = 14.6 Hz), 141.64 (d, *J* = 118.6 Hz), 131.37 (d, *J* = 72.8 Hz), 127.38 (d, *J* = 15.8 Hz), 126.91 (d, *J* = 4.8 Hz), 126.83 (d, *J* = 7.9 Hz), 125.61 (d, *J* = 5.2 Hz), 125.03 (d, *J* = 28.4 Hz), 123.49 (d, *J* = 7.6 Hz), 108.23 (d, *J* = 54.3 Hz), 70.19 (d, *J* = 15.3 Hz), 35.49 (d, *J* = 20.7 Hz), 22.52 (d, *J* = 44.8 Hz), 10.67 (d, *J* = 15.0 Hz).

**<sup>31</sup>P NMR (121 MHz, CDCl<sub>3</sub>):** 148.8 ppm.

**HRMS:** (ESI-TOF) calculated for C<sub>28</sub>H<sub>30</sub>NO<sub>4</sub>P ([M+H]<sup>+</sup>): 476.1985, found: 476.1988.

**FTIR (thin film, cm<sup>-1</sup>):** 2963, 2924, 1619, 1595, 1504.

**Optical rotation:** [α]<sub>D</sub><sup>26</sup> -666.1 (c 0.96, CHCl<sub>3</sub>).

**MP:** 94-98 °C

**Preparation of Oxidative Adduct 3:**

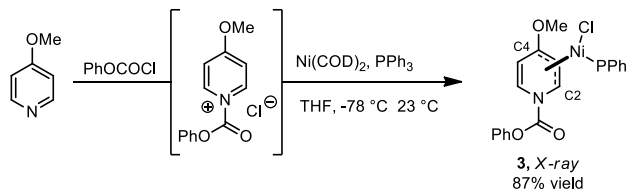

<sup>6</sup> Kangying, L.; Zhenghong, Z.; Guofeng, Z.; Chuchi, T.; *Heteroatom Chem.* **2003**, *14*, 546-550.

A solution of the pyridinium salt was prepared by the dropwise addition of phenyl chloroformate (0.576 mL, 4.58 mmol) to a solution of 4-methoxypyridine (500 mg, 4.58 mmol) in THF (20 mL) at 0 °C. The solution was then allowed to stir at 0 °C for 30 min under N<sub>2</sub>. Ni(COD)<sub>2</sub> (1.26 g, 4.58 mmol) and PPh<sub>3</sub> (1.31 g, 5.03 mmol) was weighed out into a flame-dried 50-mL Schlenk flask equipped with a PTFE stirbar in the glovebox under N<sub>2</sub> and dissolved in THF (10 mL), producing a dark orange solution. The flask was then removed from the glovebox and attached to a nitrogen line. The product was then cooled to -78 °C and the pyridinium salt solution was added dropwise. The pyridinium salt flask was then rinsed with THF (2 x 2 mL) and the rinses added dropwise to the Ni solution. The solution was then allowed to stir at -78 °C for 2 h and then allowed to warm to 23 °C. The flask was allowed to stir at 23 °C for 30 min. The reaction was brought into the glovebox and the solvent was removed under high vacuum. The residue was redissolved in THF/Toluene (2:1) and the product was precipitated by addition of pentane and storage overnight in a -30 °C freezer. The Ni-allyl complex **3** (2.355 g, 87 % yield) was collected by vacuum filtration as a light purple solid and dried *in vacuo* for 1 h. A crystal suitable for single crystal X-ray crystallography was grown from THF:Toluene:Pentane (5:1:5).

**Crystallographic data:** begins on page S-85.

**<sup>1</sup>H NMR (300 MHz, C<sub>6</sub>D<sub>6</sub>):** δ 7.89 (t, *J* = 8.6 Hz, 6H), 7.21 – 6.69 (m, 14H), 5.96 (s, 1H), 5.70 (s, 1H), 5.00 (s, 1H), 4.40 (s, 1H), 3.70 (s, 3H).

**<sup>13</sup>C NMR (125 MHz, C<sub>6</sub>D<sub>6</sub>):** δ 150.83, 149.40, 148.03, 134.51, 134.42, 133.79, 133.48, 130.03, 129.25, 128.70, 125.86, 121.35, 88.35, 72.15, 56.51.

**<sup>31</sup>P NMR (121 MHz, C<sub>6</sub>D<sub>6</sub>):** δ 33.66.

Stoichiometric/Catalytic Studies with **3**:

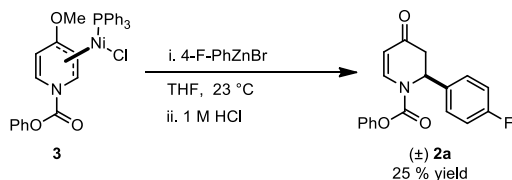

**Stoichiometric study with **3**:** A 50-mL Schlenk flask armed with a stir bar was flame-dried under vacuum and charged with nitrogen. To this flask was added air-sensitive oxidative adduct **3** (120 mg, 0.205 mmol, 1 equiv.) and 1 mL of THF in the glovebox. The Schlenk flask was treated with 4-F-PhZnBr (0.8M in THF, 3.84 mL, 15 equiv.) was added dropwise via syringe pump addition at 1 mL/h. The reaction was allowed to stir over a period of 24 h at rt. The Schlenk flask was removed from the glovebox and was added 1 M HCl (20 mL) and the solution was stirred for 20 min. The resulting mixture was diluted with diethyl ether and the aqueous layer was extracted with diethyl ether (3 x 10 mL). The combined organic layers were dried over MgSO<sub>4</sub> and filtered, and the filtrate was concentrated *in vacuo*. The crude reaction mixture was purified with silica gel (SiO<sub>2</sub>) column chromatography (3:1, 2:1 hexanes:EtOAc), providing (±) **2a** (15.8 mg, 25 % yield). Spectral data were determined to be identical to **2a**. The major

byproduct is the unsubstituted pyridone adduct presumably formed from protodemetalation after addition of acid.

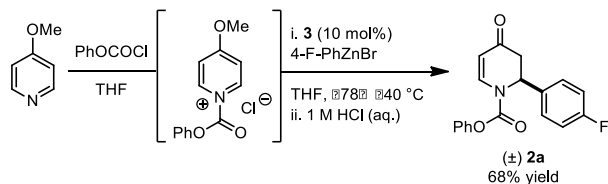

**Catalytic competency of 3:** A solution of the pyridinium salt was prepared by the dropwise addition of phenyl chloroformate (0.256 mL, 2.04 mmol) to a solution of 4-methoxypyridine (0.056 g, 0.51 mmol) in THF (12.0 mL) at 0 °C. The solution was then allowed to stir at 0 °C for 30 min under N<sub>2</sub>. Oxidative adduct **3** (0.029 g, 0.051 mmol) was weighed out into a 50-mL Schlenk flask equipped with a PTFE stirbar in the glovebox under N<sub>2</sub>. THF (12.0 mL) was added to dissolve the complex and the flask was removed from the glovebox. The solution of the complex was then placed under N<sub>2</sub> and cooled to -78 °C. 4-F-PhZnBr 0.3 M in THF, (6.80 mL, 2.04 mmol) was then added dropwise, followed by the dropwise addition of the pyridinium solution. The flask containing the pyridinium solution was rinsed with THF (2 x 4 mL). The Schlenk flask was then transferred to a -40 °C bath and allowed to stir for 16 h. The reaction was quenched by the addition of aqueous HCl (1 M, 10 mL) at -40 °C. The solution was then allowed to warm to 23 °C and allowed to stir for 10 min. The reaction mixture was poured into a separatory funnel and extracted with Et<sub>2</sub>O (3 x 20 mL). The combined organic extracts were rinsed sequentially with saturated aqueous NaHCO<sub>3</sub> (20 mL) and brine (20 mL), dried with MgSO<sub>4</sub>, and filtered. The solution was concentrated under reduced pressure to yield a yellow oil. The crude product was purified by column chromatography (25 g pre-packed silica gel cartridge, hexanes:EtOAc gradient 96:4 to 50:50) to yield (±) **2a** (0.119 g, 0.383 mmol, 68 % yield) as a white foam. The identity of the product was confirmed by <sup>1</sup>H and <sup>13</sup>C NMR analysis to be identical to **2a**.

### III. Additional Optimization Experiments

#### A. Additional ligand evaluation

Further study of the (*S,S,S*) diastereomer of **L9** using otherwise identical procedures to those shown in Table 1 provided **2a** in 13% <sup>19</sup>F NMR yield (0.05 mmol) and -13% ee.

#### B. Confirmation of the role of the Ni catalyst

In conditions analogous to those depicted in Table 2 with the exception that no Ni source was added, **2a** was formed in 9.8% <sup>19</sup>F NMR yield and 0% ee.

#### C. Miscellaneous optimization experiments

**Table S1. Evaluation of Ni precatalysts.**

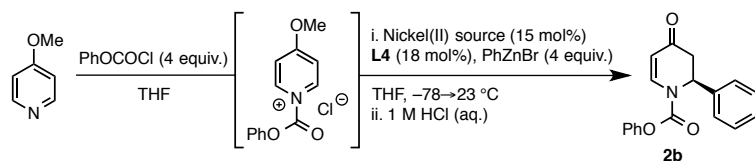

| Entry | Ni source                  | Yield (%) | ee (%) |
|-------|----------------------------|-----------|--------|
| 1     | NiBr <sub>2</sub> •diglyme | 33        | 81     |
| 2     | NiCl <sub>2</sub> •diglyme | 21        | 82     |
| 3     | NiF <sub>2</sub>           | 26        | 0      |
| 4     | NiI <sub>2</sub>           | 46        | 19     |
| 5     | Ni(OTf) <sub>2</sub>       | 37        | 0      |
| 6     | Ni(TMHD) <sub>2</sub>      | 13        | 37     |
| 7     | Ni(acac) <sub>2</sub>      | 17        | 70     |

**Table S2. Evaluation of nucleophile and chloroformate equivalents.**

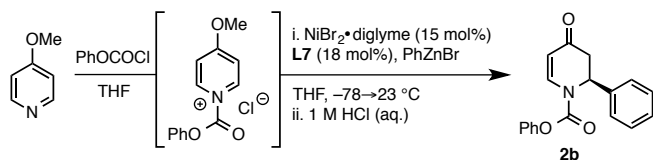

| Entry | Equiv. PhCOCl | Equiv PhZnBr | Yield (%) | ee (%) |
|-------|---------------|--------------|-----------|--------|
| 1     | 2             | 4            | n.d.      | 26     |
| 2     | 4             | 4            | 54        | 85     |
| 3     | 2             | 6            | n.d.      | 11     |
| 4     | 4             | 6            | 52        | 85     |



**Table S3. Evaluation of temperature.**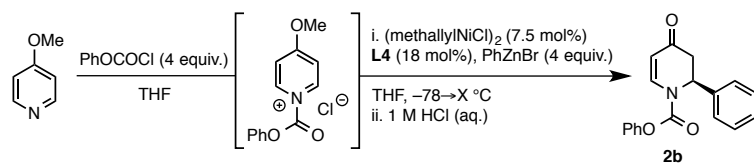

| Entry | X (°C) | Yield (%) | ee (%) |
|-------|--------|-----------|--------|
| 1     | -60    | 21        | 77     |
| 2     | -40    | 32        | 76     |
| 3     | -20    | 14        | 68     |
| 4     | 0      | 29        | 60     |

**Table S4. Evaluation of co-solvent.**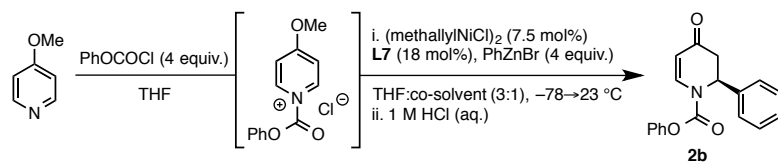

| Entry | Co-solvent        | Yield (%) | ee (%) |
|-------|-------------------|-----------|--------|
| 1     | none              | 31        | 85     |
| 2     | dioxane           | 40        | 67     |
| 3     | toluene           | 10        | 67     |
| 4     | DMA               | 10        | 27     |
| 5     | <i>t</i> -AmOH    | 0         | n.d    |
| 6     | Et <sub>2</sub> O | 70        | 70     |
| 7     | DCM               | 17        | 17     |

#### IV. Characterization

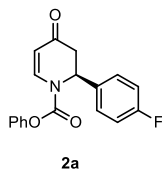

**(S)-phenyl 2-(4-fluorophenyl)-4-oxo-3,4-dihydropyridine-1(2H)-carboxylate (2a):** The zincbromide solution was prepared via method A. General procedure was followed, providing **2a** in 88% yield, 93% ee as a clear oil (Run 1). Run 2 provided 80% yield and 93% ee.

**<sup>1</sup>H NMR (500 MHz, MeOD):**  $\delta$  8.29 (d,  $J$  = 8.3 Hz, 1H), 7.44 (t,  $J$  = 7.9 Hz, 2H), 7.40 (dd,  $J$  = 8.6, 5.2 Hz, 2H), 7.31 (t,  $J$  = 7.4 Hz, 1H), 7.17 (s, 2H), 7.15 (t,  $J$  = 8.7 Hz, 2H), 5.96 (d,  $J$  = 6.9 Hz, 1H), 5.51 (d,  $J$  = 8.4 Hz, 1H), 3.40 (dd,  $J$  = 16.7, 7.5 Hz, 1H), 2.82 (d,  $J$  = 16.7 Hz, 1H).

**<sup>13</sup>C NMR (125 MHz, MeOD):**  $\delta$  195.37, 164.45 (d,  $J$  = 245.2 Hz), 153.58, 152.72, 145.34, 136.63, 131.33, 129.64 (d,  $J$  = 8.3 Hz), 128.17, 123.17, 117.40 (d,  $J$  = 21.9 Hz), 109.76, 57.85, 43.70.

**<sup>19</sup>F NMR (282 MHz, CDCl<sub>3</sub>):**  $\delta$  -113.45 – -113.59 (septet,  $J$  = 9.0, 5.0 Hz).

**HRMS:** (ESI-TOF) calculated for C<sub>18</sub>H<sub>14</sub>FNO<sub>3</sub> ([M+H]<sup>+</sup>): 362.0925, found: 362.0988.

**FTIR (thin film, cm<sup>-1</sup>):** 1738, 1671, 1607, 1510.

**Optical rotation:**  $[\alpha]_D^{26}$  +45.9 ( $c$  3.8, CHCl<sub>3</sub>).

**HPLC:** Chiralpak OD-H, 1:4, IPA to Hexanes, 40 min run, 0.8 mL/min.

**Racemic Standard:**

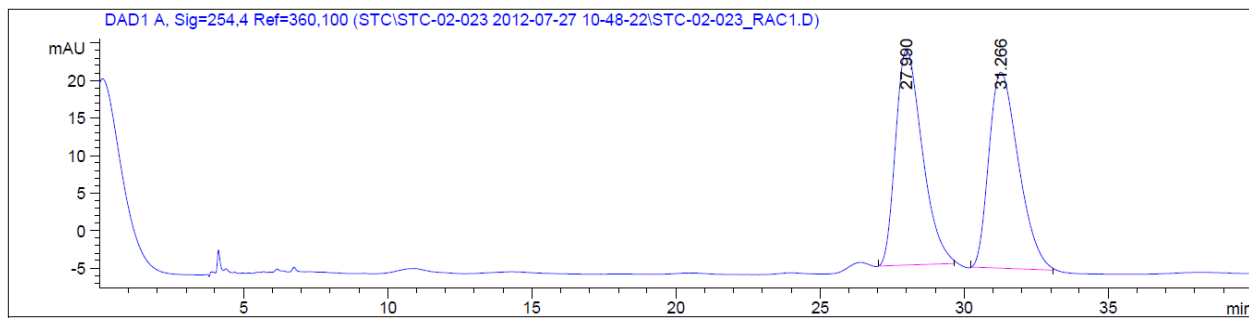

| Peak # | RetTime [min] | Type | Width [min] | Area [mAU*s] | Height [mAU] | Area %  |
|--------|---------------|------|-------------|--------------|--------------|---------|
| 1      | 27.990        | BB   | 0.9707      | 1851.09277   | 28.68992     | 49.7293 |
| 2      | 31.266        | BB   | 1.0462      | 1871.24280   | 26.17061     | 50.2707 |

**Enantioenriched:**

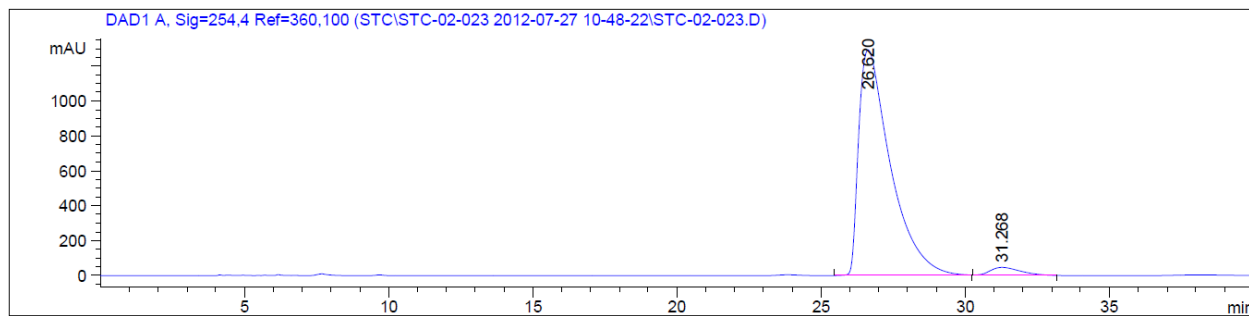

| Peak # | RetTime [min] | Type | Width [min] | Area [mAU*s] | Height [mAU] | Area %  |
|--------|---------------|------|-------------|--------------|--------------|---------|
| 1      | 26.620        | BB   | 1.1300      | 9.91445e4    | 1293.81543   | 96.5802 |
| 2      | 31.268        | BB   | 1.1377      | 3510.57080   | 46.87749     | 3.4198  |

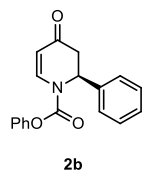

**(S)-phenyl 4-oxo-2-phenyl-3,4-dihydropyridine-1(2H)-carboxylate (2b):** The zincbromide solution was prepared via method A. General procedure was followed and the crude material was purified with 5% Et<sub>3</sub>N buffered Iatrobeds 6RS-8060 silica gel, providing **2b** in 81% yield, 93% ee as a white solid (Run 1). Run 2 provided 91% yield and 91% ee. Recrystallized from hexane:ether (1:1) to provide 78% yield in >99% ee.

**Crystallographic data:** begins on page S-77.

**<sup>1</sup>H NMR (500 MHz, MeOD):** δ 8.32 (d, *J* = 8.3 Hz, 1H), 7.50 – 7.25 (m, 8H), 7.15 (s, 2H), 5.97 (d, *J* = 7.0 Hz, 1H), 5.51 (d, *J* = 8.3 Hz, 1H), 3.41 (dd, *J* = 16.6, 7.5 Hz, 1H), 2.85 (d, *J* = 16.6 Hz, 1H).

**<sup>13</sup>C NMR (125 MHz, MeOD):** δ 193.46, 151.61, 150.65, 143.41, 138.47, 129.23, 128.62, 127.67, 126.05, 125.38, 121.07, 107.70, 56.36, 41.66.

**HRMS:** (ESI-TOF) calculated for C<sub>18</sub>H<sub>15</sub>NO<sub>3</sub> ([M+H]<sup>+</sup>): 294.1051, found: 294.1113.

**FTIR (thin film, cm<sup>-1</sup>):** 1733, 1666, 1605, 1494.

**Optical rotation:** [α]<sub>D</sub><sup>26</sup> +25.4 (*c* 1.1, CHCl<sub>3</sub>).

**Melting point:** 122-126°C.

**HPLC:** Chiralpak OD-H, 1:4, IPA to Hexanes, 30 min run, 0.8 mL/min.

**Racemic standard:**

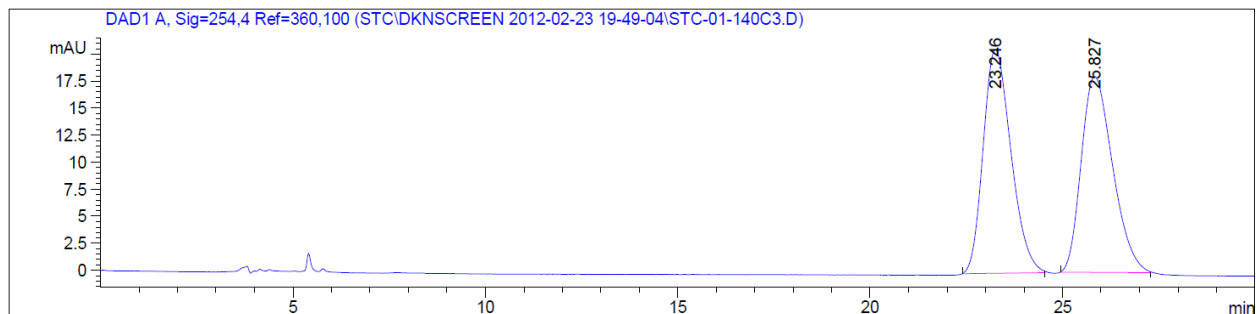

| Peak # | RetTime [min] | Type | Width [min] | Area [mAU*s] | Height [mAU] | Area %  |
|--------|---------------|------|-------------|--------------|--------------|---------|
| 1      | 23.246        | BB   | 0.7698      | 1040.75928   | 20.72812     | 50.2625 |
| 2      | 25.827        | BB   | 0.8504      | 1029.88733   | 18.13890     | 49.7375 |

**Enantioenriched:**

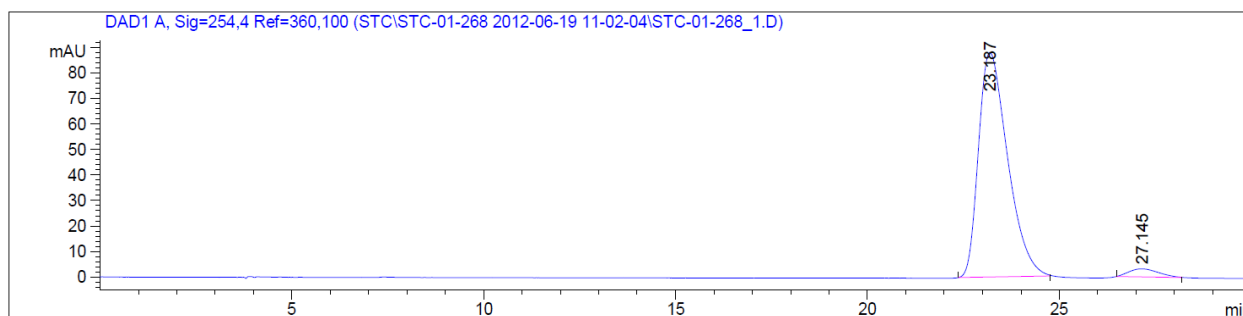

| Peak # | RetTime [min] | Type | Width [min] | Area [mAU*s] | Height [mAU] | Area %  |
|--------|---------------|------|-------------|--------------|--------------|---------|
| 1      | 23.187        | BB   | 0.8062      | 4659.59229   | 88.21658     | 96.3885 |
| 2      | 27.145        | BB   | 0.6374      | 174.58669    | 3.22595      | 3.6115  |

**Recrystallized:**

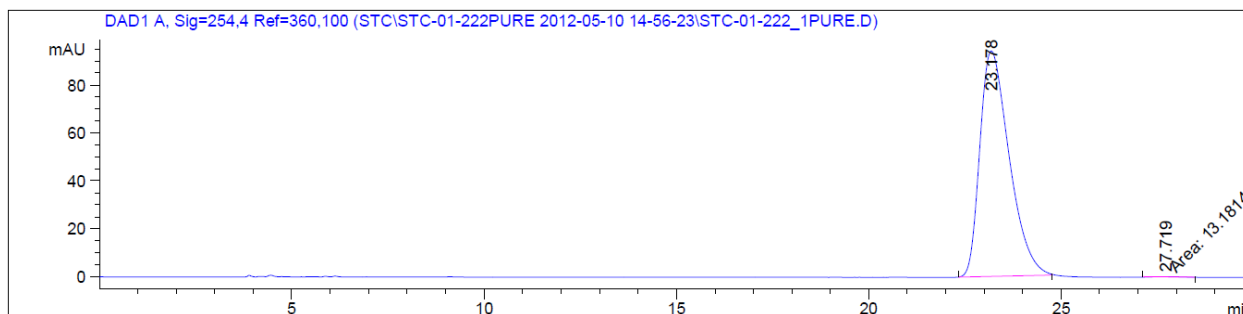

| Peak # | RetTime [min] | Type | Width [min] | Area [mAU*s] | Height [mAU] | Area %  |
|--------|---------------|------|-------------|--------------|--------------|---------|
| 1      | 23.178        | BB   | 0.8049      | 4995.19971   | 94.16082     | 99.7368 |
| 2      | 27.719        | MM   | 0.8260      | 13.18143     | 2.65954e-1   | 0.2632  |

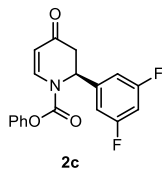

**(S)-phenyl 2-(3,5-difluorophenyl)-4-oxo-3,4-dihydropyridine-1(2H)-carboxylate (2c):** The zincbromide solution was prepared via method A. General procedure was followed, providing **2c** in 80% yield, >99% ee as a white foam (Run 1). Run 2 provided 79% yield and >99% ee.

**<sup>1</sup>H NMR (500 MHz, MeOD):**  $\delta$  8.30 (d,  $J$  = 8.2 Hz, 1H), 7.44 (t,  $J$  = 7.9 Hz, 2H), 7.31 (t,  $J$  = 7.4 Hz, 1H), 7.19 (s, 2H), 7.00 (d,  $J$  = 6.5 Hz, 2H), 6.95 (t,  $J$  = 9.0 Hz, 1H), 5.96 (s, 1H), 5.51 (d,  $J$  = 8.3 Hz, 1H), 3.38 (dd,  $J$  = 17.2, 8.0 Hz, 1H), 2.82 (d,  $J$  = 16.7 Hz, 1H).

**<sup>13</sup>C NMR (125 MHz, CDCl<sub>3</sub>):**  $\delta$  190.91, 164.28 (dd,  $J$  = 250.2, 12.7 Hz), 151.29, 150.19, 142.19, 141.77, 129.76, 126.69, 121.18, 110.16 (dd,  $J$  = 25.9, 5.9 Hz), 109.14, 103.96 (t,  $J$  = 25.2 Hz), 55.85, 41.51.

**<sup>19</sup>F NMR (282 MHz, CDCl<sub>3</sub>):**  $\delta$  -107.71 (broad singlet).

**HRMS:** (ESI-TOF) calculated for C<sub>18</sub>H<sub>13</sub>F<sub>2</sub>NO<sub>3</sub> ([M+H]<sup>+</sup>): 330.0863, found: 330.0960.

**FTIR (thin film, cm<sup>-1</sup>):** 1739, 1672, 1607, 1419.

**Optical rotation:**  $[\alpha]_D^{26}$  -17.5 ( $c$  7.7, CHCl<sub>3</sub>).

**HPLC:** Chiralpak OD-H, 1:4, IPA to Hexanes, 40 min run, 0.8 mL/min.

**Racemic Standard:**

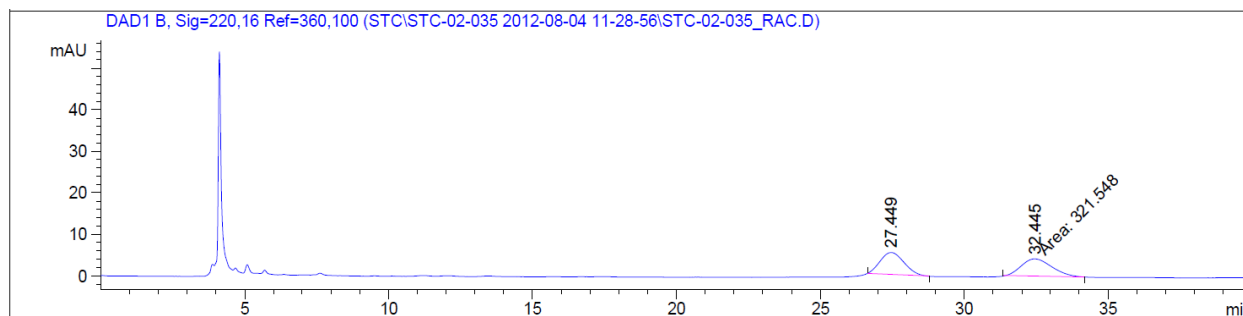

| Peak # | RetTime [min] | Type | Width [min] | Area [mAU*s] | Height [mAU] | Area %  |
|--------|---------------|------|-------------|--------------|--------------|---------|
| 1      | 27.449        | BB   | 0.7674      | 314.88690    | 5.37558      | 49.4767 |
| 2      | 32.445        | MM   | 1.2610      | 321.54761    | 4.24987      | 50.5233 |

**Enantioenriched:**

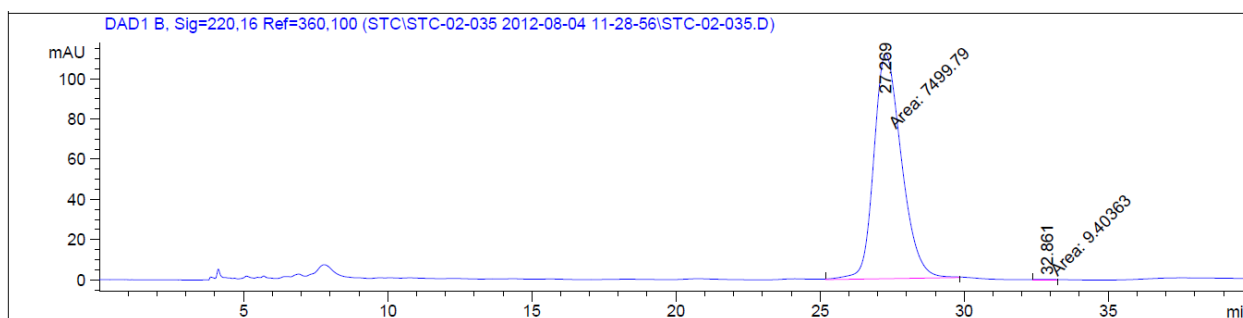

| Peak # | RetTime [min] | Type | Width [min] | Area [mAU*s] | Height [mAU] | Area %  |
|--------|---------------|------|-------------|--------------|--------------|---------|
| 1      | 27.269        | MM   | 1.1162      | 7499.79297   | 111.98203    | 99.8748 |
| 2      | 32.861        | MM   | 0.7863      | 9.40363      | 1.99332e-1   | 0.1252  |

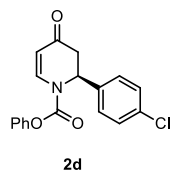

**(S)-phenyl 2-(4-chlorophenyl)-4-oxo-3,4-dihydropyridine-1(2H)-carboxylate (2d):** The zincbromide solution was prepared via method A. General procedure was followed, providing **2d** in 85% yield, 95% ee as a clear oil (Run 1). Run 2 provided 83% yield and 96% ee.

**<sup>1</sup>H NMR (500 MHz, MeOD):**  $\delta$  8.24 (d,  $J$  = 8.4 Hz, 1H), 7.43 – 7.25 (m, 7H), 7.15 (s, 2H), 5.91 (s, 1H), 5.47 (d,  $J$  = 8.4 Hz, 1H), 3.43 – 3.25 (dd,  $J$  = 16.7, 7.6 Hz, 1H), 2.78 (d,  $J$  = 16.7 Hz, 1H).

**<sup>13</sup>C NMR (125 MHz, MeOD):**  $\delta$  194.67, 153.07, 152.23, 144.82, 138.88, 135.09, 130.92, 130.34, 128.84, 127.76, 122.74, 109.39, 57.41, 43.07.

**HRMS:** (ESI-TOF) calculated for C<sub>18</sub>H<sub>14</sub>ClNO<sub>3</sub> ([M+H]<sup>+</sup>): 328.0662, found: 328.0723.

**FTIR (thin film, cm<sup>-1</sup>):** 1734, 1667, 1606, 1492.

**Optical rotation:**  $[\alpha]_D^{26}$  +12.2 ( $c$  1.0, CHCl<sub>3</sub>).

**HPLC:** Chiralpak OD-H, 1:4, IPA to Hexanes, 40 min run, 0.8 mL/min.



**Racemic Standard:**

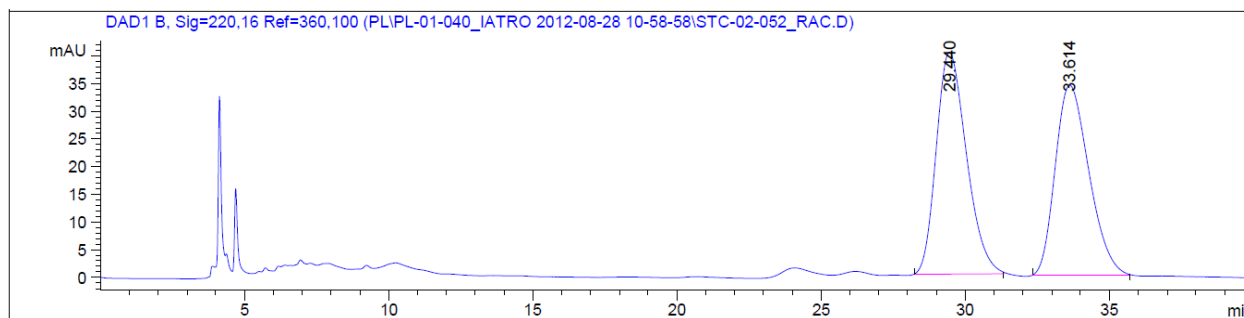

| Peak # | RetTime [min] | Type | Width [min] | Area [mAU*s] | Height [mAU] | Area %  |
|--------|---------------|------|-------------|--------------|--------------|---------|
| 1      | 29.433        | BB   | 0.9737      | 862.00659    | 12.12163     | 51.7299 |
| 2      | 33.604        | BB   | 1.0046      | 804.35516    | 10.14956     | 48.2701 |

**Enantioenriched:**

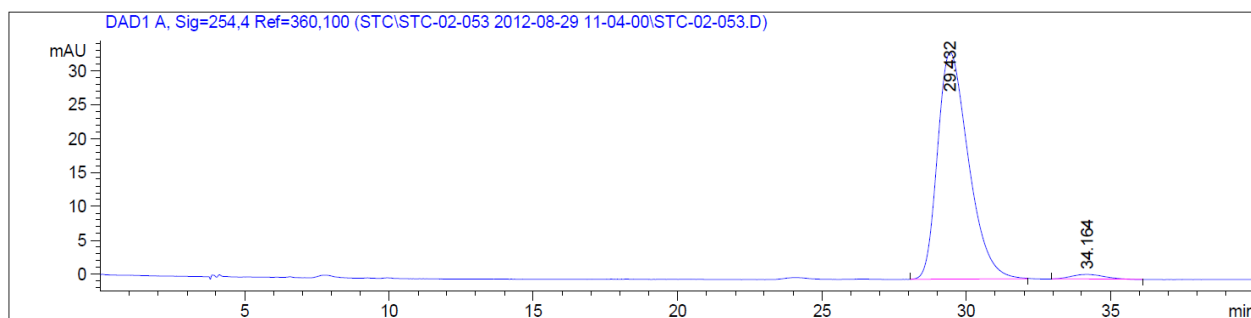

| Peak # | RetTime [min] | Type | Width [min] | Area [mAU*s] | Height [mAU] | Area %  |
|--------|---------------|------|-------------|--------------|--------------|---------|
| 1      | 29.432        | BB   | 1.1413      | 2493.43042   | 33.46296     | 97.7392 |
| 2      | 34.164        | BB   | 0.9624      | 57.67502     | 7.18551e-1   | 2.2608  |

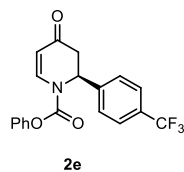

**(S)-phenyl 4-oxo-2-(4-(trifluoromethyl)phenyl)-3,4-dihydropyridine-1(2H)-carboxylate (2e):** The zincbromide solution was prepared via method A. General procedure was followed, providing **2e** in 92% yield, 98% ee as a clear oil (Run 1). Run 2 provided 95% yield and 98% ee.

**<sup>1</sup>H NMR (500 MHz, MeOD):**  $\delta$  8.31 (d,  $J$  = 8.3 Hz, 1H), 7.71 (d,  $J$  = 8.2 Hz, 2H), 7.56 (d,  $J$  = 8.2 Hz, 2H), 7.42 (t,  $J$  = 7.8 Hz, 2H), 7.30 (t,  $J$  = 7.4 Hz, 1H), 7.17 (s, 2H), 6.03 (s, 1H), 5.51 (d,  $J$  = 8.4 Hz, 1H), 3.41 (dd,  $J$  = 16.7, 7.6 Hz, 1H), 2.85 (d,  $J$  = 16.7 Hz, 1H).

**<sup>13</sup>C NMR (125 MHz, MeOD):**  $\delta$  192.78, 151.44, 150.60, 143.26, 142.89, 129.77 (q,  $J$  = 32.5 Hz), 129.29, 126.25, 126.14, 125.57 (q,  $J$  = 3.3 Hz), 127.43 – 120.47 (q,  $J$  = 269.4 Hz.), 121.09, 107.87, 56.02, 41.37.

**<sup>19</sup>F NMR (282 MHz, CDCl<sub>3</sub>):**  $\delta$  -62.64.

**HRMS:** (ESI-TOF) calculated for C<sub>19</sub>H<sub>14</sub>F<sub>3</sub>NO<sub>3</sub> ([M+H]<sup>+</sup>):362.0925, found: 362.0988.

**FTIR (thin film, cm<sup>-1</sup>):** 1736, 1670, 1606, 1493.

**Optical rotation:**  $[\alpha]_D^{26}$  -4.2 (c 6.6, CHCl<sub>3</sub>).

**Melting point:** 68-74°C.

**HPLC:** Chiralpak OD-H, 1:4, IPA to Hexanes, 40 min run, 0.8 mL/min.

**Racemic Standard:**

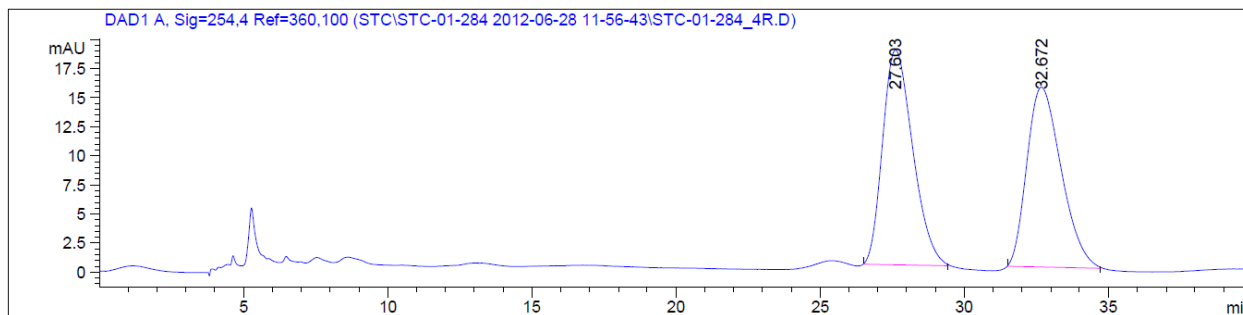

| Peak # | RetTime [min] | Type | Width [min] | Area [mAU*s] | Height [mAU] | Area %  |
|--------|---------------|------|-------------|--------------|--------------|---------|
| 1      | 27.603        | BB   | 1.0021      | 1345.67505   | 18.51154     | 51.1702 |
| 2      | 32.672        | BB   | 0.9880      | 1284.12549   | 15.50898     | 48.8298 |

**Enantioenriched:**

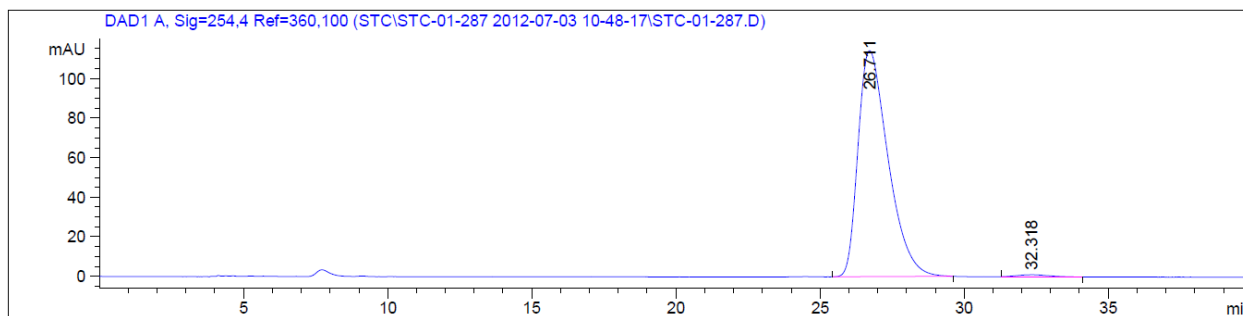

| Peak # | RetTime [min] | Type | Width [min] | Area [mAU*s] | Height [mAU] | Area %  |
|--------|---------------|------|-------------|--------------|--------------|---------|
| 1      | 26.711        | BB   | 1.1112      | 8297.55176   | 114.26085    | 99.0091 |
| 2      | 32.318        | BB   | 0.9402      | 83.04057     | 1.05977      | 0.9909  |

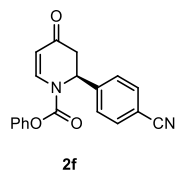

**(S)-phenyl 2-(4-cyanophenyl)-4-oxo-3,4-dihydropyridine-1(2H)-carboxylate (2f):** The zincbromide solution was prepared via method A. General procedure was followed, providing **2f** in 90% yield, 97% ee as a white solid (Run 1). Run 2 provided 91% yield and 98% ee.

**<sup>1</sup>H NMR (500 MHz, MeOD):**  $\delta$  8.34 (d,  $J$  = 7.5 Hz, 1H), 7.80 (d,  $J$  = 5.9 Hz, 2H), 7.58 (d,  $J$  = 8.0 Hz, 2H), 7.45 (t,  $J$  = 7.7 Hz, 2H), 7.32 (t,  $J$  = 7.4 Hz, 1H), 7.18 (s, 2H), 6.05 (s, 1H), 5.52 (d,  $J$  = 8.3 Hz, 1H), 3.46 (dd,  $J$  = 16.5, 7.2 Hz, 1H), 2.86 (d,  $J$  = 16.8 Hz, 1H).

**<sup>13</sup>C NMR (125 MHz, MeOD):**  $\delta$  194.25, 153.08, 152.29, 145.73, 144.98, 134.25, 130.96, 128.28, 127.84, 122.75, 119.59, 113.30, 109.54, 57.81, 42.92.

**HRMS:** (ESI-TOF) calculated for C<sub>19</sub>H<sub>14</sub>N<sub>2</sub>O<sub>3</sub> ([M+H]<sup>+</sup>): 308.1208, found: 308.1271.

**FTIR (thin film, cm<sup>-1</sup>):** 2229, 1736, 1667, 1604, 1493.

**Optical rotation:**  $[\alpha]_D^{26}$  -24.8 ( $c$  1.7, CHCl<sub>3</sub>).

**HPLC:** Chiralpak AD-H, 1:4, IPA to Hexanes, 30 min run, 0.8 mL/min.

**Racemic standard:**

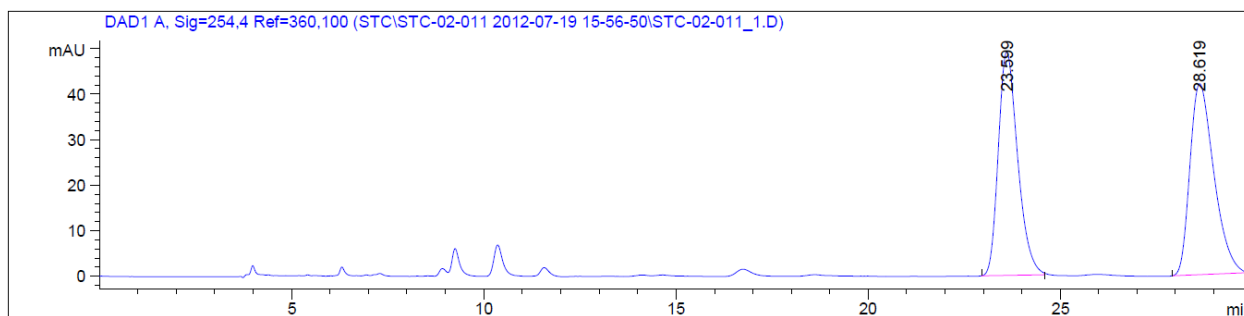

| Peak # | RetTime [min] | Type | Width [min] | Area [mAU*s] | Height [mAU] | Area %  |
|--------|---------------|------|-------------|--------------|--------------|---------|
| 1      | 23.599        | BB   | 0.5372      | 1725.95996   | 49.20678     | 48.6220 |
| 2      | 28.619        | BB   | 0.6640      | 1823.78784   | 42.05377     | 51.3780 |

**Enantioenriched:**

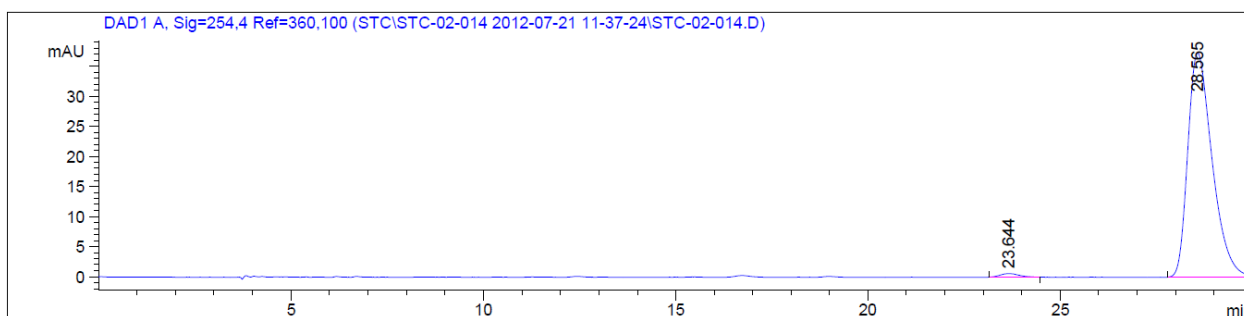

| Peak # | RetTime [min] | Type | Width [min] | Area [mAU*s] | Height [mAU] | Area %  |
|--------|---------------|------|-------------|--------------|--------------|---------|
| 1      | 23.644        | BB   | 0.4205      | 21.14775     | 6.12921e-1   | 1.2721  |
| 2      | 28.565        | BBA  | 0.6749      | 1641.29871   | 37.33656     | 98.7279 |

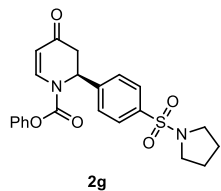

**(S)-phenyl 4-oxo-2-(4-(pyrrolidin-1-ylsulfonyl)phenyl)-3,4-dihydropyridine-1(2H)-carboxylate (2g):** The zincbromide solution was prepared via method A. General procedure was followed with the exception of temperature ( $-78^{\circ}\text{C}$  to rt) and the crude material was purified with flash chromatography ( $\text{SiO}_2$ ) (1:1 hexanes: EtOAc), providing **2g** in 75% yield, 98% ee as a pale yellow foam (Run 1). Run 2 provided 66% yield and 97% ee.

**$^1\text{H}$  NMR (500 MHz, MeOD):**  $\delta$  8.33 (d,  $J = 8.3$  Hz, 1H), 7.88 (d,  $J = 8.0$  Hz, 2H), 7.61 (d,  $J = 8.1$  Hz, 2H), 7.42 (t,  $J = 7.8$  Hz, 2H), 7.30 (t,  $J = 7.4$  Hz, 1H), 7.17 (s, 2H), 6.05 (d,  $J = 7.8$  Hz, 1H), 5.51 (d,  $J = 8.4$  Hz, 1H), 3.45 (dd,  $J = 16.7, 7.6$  Hz, 1H), 3.23 (q,  $J = 4.7, 3.3$  Hz, 4H), 2.86 (d,  $J = 16.7$  Hz, 1H), 1.84 – 1.63 (m, 4H).

**$^{13}\text{C}$  NMR (125 MHz, MeOD):**  $\delta$  194.87, 153.58, 152.77, 145.89, 145.50, 138.53, 131.44, 130.13, 128.61, 128.31, 123.24, 110.04, 58.24, 49.91, 43.50, 26.99.

**HRMS:** (ESI-TOF) calculated for  $\text{C}_{22}\text{H}_{22}\text{N}_2\text{O}_5\text{S}$  ( $[\text{M}+\text{H}]^+$ ): 427.13222, found: 427.13105.

**FTIR (thin film,  $\text{cm}^{-1}$ ):** 1739, 1671, 1607, 1333

**Optical rotation:**  $[\alpha]_{\text{D}}^{26} +5.0$  (c 1.0,  $\text{CHCl}_3$ ).

**SFC:** Chiralpak IA, 40% MeOH (DEA)/ $\text{CO}_2$  (100 bar)  $40^{\circ}\text{C}$ , 3ml/min, 220 nm.

**Melting Point:** 118-120  $^{\circ}\text{C}$ .

Racemic

Standard:

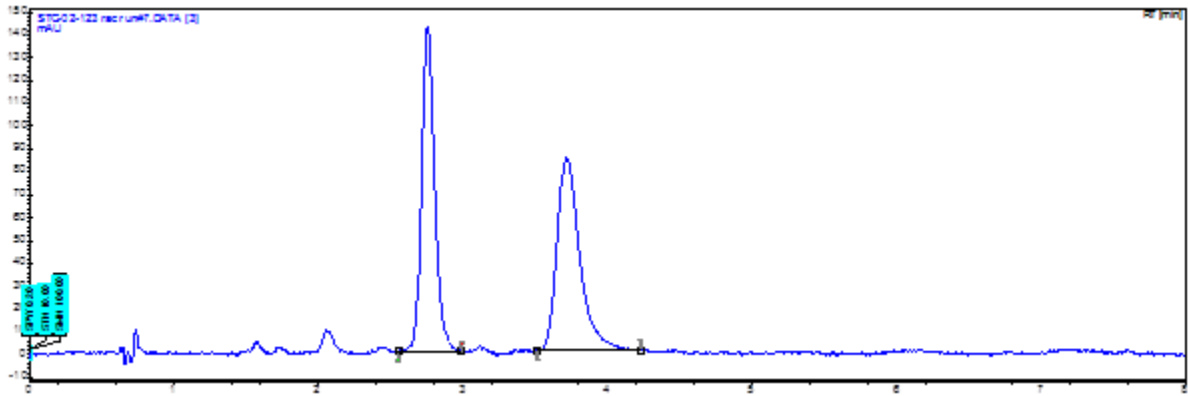

| Index | Time [Min] | Width [Min] | Height [μV] | Res. HW | Selectivity | Area [μV.Min] | Area [%] |
|-------|------------|-------------|-------------|---------|-------------|---------------|----------|
| 1     | 2.75       | 0.10        | 142.5       | 0.00    | 0.00        | 15.1          | 49.748   |
| 2     | 3.72       | 0.16        | 84.1        | 4.45    | 1.35        | 15.2          | 50.252   |
| Total |            |             | 226.6       |         |             | 30.3          | 100.000  |

Enantioenriched:

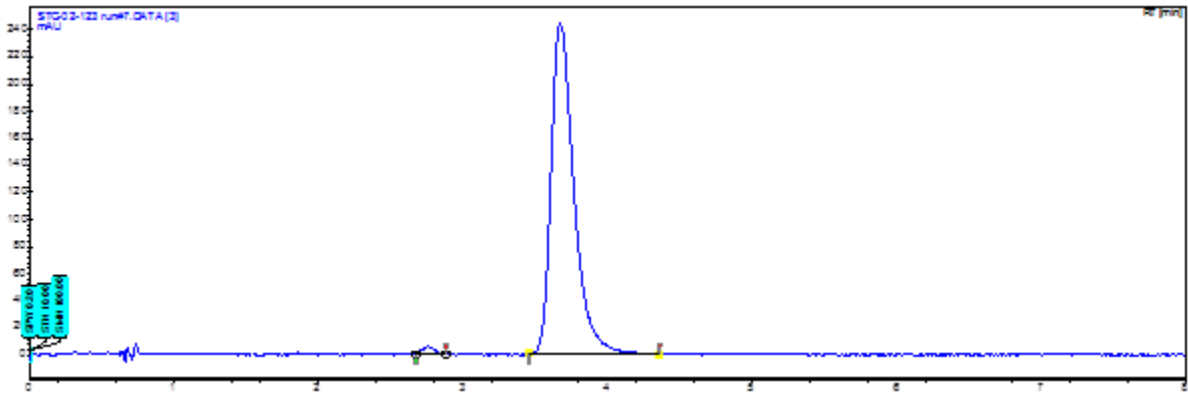

| Index | Time [Min] | Width [Min] | Height [μV] | Res. HW | Selectivity | Area [μV.Min] | Area [%] |
|-------|------------|-------------|-------------|---------|-------------|---------------|----------|
| 2     | 2.75       | 0.10        | 5.7         | 0.00    | 0.00        | 0.6           | 1.234    |
| 1     | 3.67       | 0.16        | 243.4       | 4.16    | 1.33        | 44.3          | 98.766   |
| Total |            |             | 249.2       |         |             | 44.8          | 100.000  |

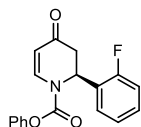

**2h**

**(S)-phenyl 2-(2-fluorophenyl)-4-oxo-3,4-dihydropyridine-1(2H)-carboxylate (2h):** The zincbromide solution was prepared via method A. General procedure was followed with the following exceptions: the reaction was warmed to a constant  $-20^{\circ}\text{C}$  and the crude material was purified with 5%  $\text{Et}_3\text{N}$  buffered Iatrobeds 6RS-8060 silica gel, providing **2h** in 62% yield, 92% ee as a white solid (Run 1). Run 2 provided 56% yield and 90% ee.

**$^1\text{H}$  NMR (500 MHz, MeOD):**  $\delta$  8.39 (d,  $J = 8.4$  Hz, 1H), 7.46 – 7.37 (m, 3H), 7.36 – 7.28 (m, 2H), 7.25 – 7.17 (m, 2H), 7.12 (s, 2H), 6.19 (d,  $J = 7.6$  Hz, 1H), 5.75 – 5.38 (m, 1H), 3.44 (dd,  $J = 16.6, 7.9$  Hz, 1H), 2.75 (dd,  $J = 16.8, 1.5$  Hz, 1H).

**$^{13}\text{C}$  NMR (125 MHz,  $\text{CDCl}_3$ ):**  $\delta$  191.45, 160.73 (d,  $J = 247.0$  Hz), 151.25, 150.25, 142.52, 130.00 (d,  $J = 8.4$  Hz), 129.63, 126.52, 126.14 (d,  $J = 3.2$  Hz), 125.37 (d,  $J = 11.7$  Hz), 124.52 (d,  $J = 3.1$  Hz), 121.17, 116.41 (d,  $J = 21.7$  Hz), 108.78, 51.50, 41.09.

**$^{19}\text{F}$  NMR (282 MHz,  $\text{CDCl}_3$ ):**  $\delta$   $-119.67$  ppm.

**HRMS:** (ESI-TOF) calculated for  $\text{C}_{18}\text{H}_{14}\text{FNO}_3$  ( $[\text{M}+\text{H}]^+$ ): 312.1030, found: 312.1025.

**FTIR (thin film,  $\text{cm}^{-1}$ ):** 1742, 1672, 1611, 1488.

**Optical rotation:**  $[\alpha]_{\text{D}}^{26} +13.3$  ( $c$  1.0,  $\text{CHCl}_3$ ).

**HPLC:** Chiralpak OD-H, 1:4, IPA to Hexanes, 40 min run, 0.8 mL/min.



**Racemic Standard:**

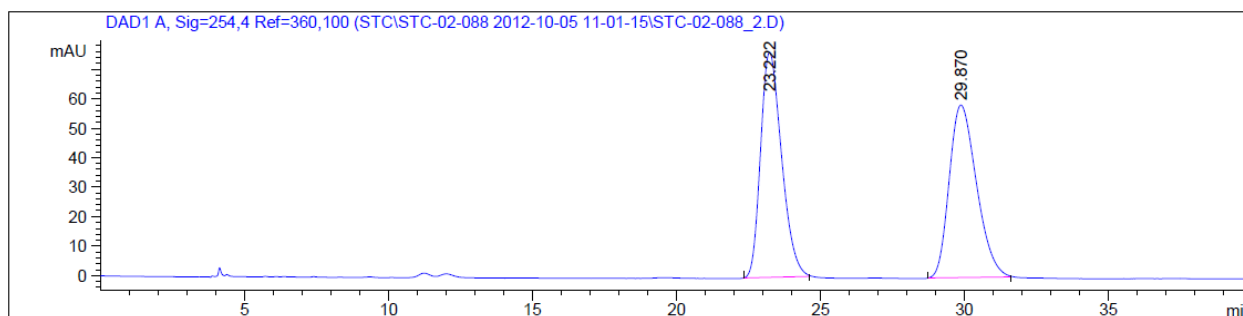

| Peak # | RetTime [min] | Type | Width [min] | Area [mAU*s] | Height [mAU] | Area %  |
|--------|---------------|------|-------------|--------------|--------------|---------|
| 1      | 23.222        | BB   | 0.7756      | 3874.73901   | 76.41698     | 50.0528 |
| 2      | 29.870        | BB   | 1.0178      | 3866.55884   | 58.60061     | 49.9472 |

**Enantioenriched:**

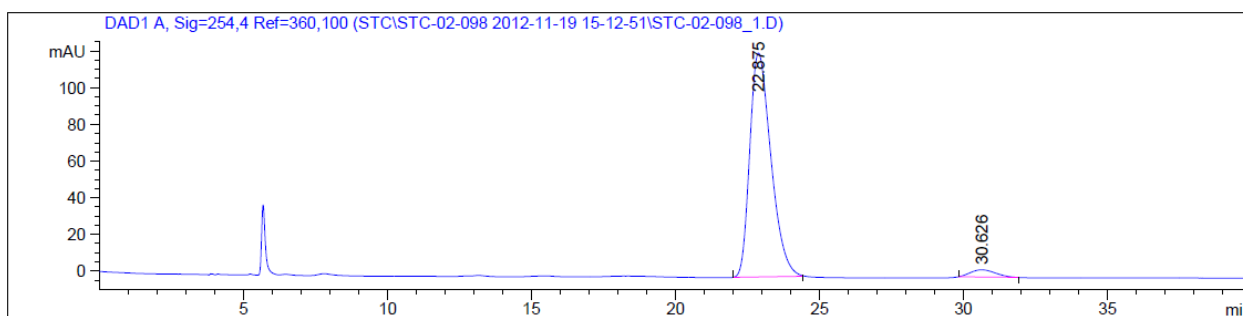

| Peak # | RetTime [min] | Type | Width [min] | Area [mAU*s] | Height [mAU] | Area %  |
|--------|---------------|------|-------------|--------------|--------------|---------|
| 1      | 22.875        | BB   | 0.7890      | 6256.03564   | 122.25266    | 96.1654 |
| 2      | 30.626        | BB   | 0.7444      | 249.46289    | 4.05113      | 3.8346  |

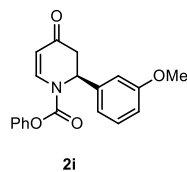

**(S)-phenyl 2-(3-methoxyphenyl)-4-oxo-3,4-dihydropyridine-1(2H)-carboxylate (2i):** The zincbromide solution was prepared via method A. General procedure was followed, providing **2i** in 85% yield, 89% ee as a clear oil (Run 1). Run 2 provided 93% yield and 87% ee.

**<sup>1</sup>H NMR (500 MHz, MeOD):** δ 8.28 (d, *J* = 8.4 Hz, 1H), 7.42 (t, *J* = 7.8 Hz, 2H), 7.30 (q, *J* = 7.3 Hz, 2H), 7.14 (s, 2H), 6.93 – 6.87 (m, 3H), 5.91 (d, *J* = 6.9 Hz, 1H), 5.48 (d, *J* = 8.4 Hz, 1H), 3.79 (s, 3H), 3.40 – 3.29 (dd, *J* = obscured 1H), 2.82 (d, *J* = 16.6 Hz, 1H).

**<sup>13</sup>C NMR (125 MHz, MeOD):** δ 195.10, 161.84, 153.25, 152.29, 145.01, 141.72, 131.42, 130.92, 127.73, 122.75, 119.04, 114.33, 113.18, 109.32, 57.94, 55.98, 43.26.

**HRMS:** (ESI-TOF) calculated for C<sub>19</sub>H<sub>17</sub>NO<sub>4</sub> ([M+H]<sup>+</sup>): 324.1157, found: 324.1211.

**FTIR (thin film, cm<sup>-1</sup>):** 1735, 1669, 1605, 1489.

**Optical rotation:** [α]<sub>D</sub><sup>26</sup> +15.1 (*c* 3.2, CHCl<sub>3</sub>).

**HPLC:** Chiralpak OD-H, 1:4, IPA to Hexanes, 40 min run, 0.8 mL/min.

**Racemic standard:**

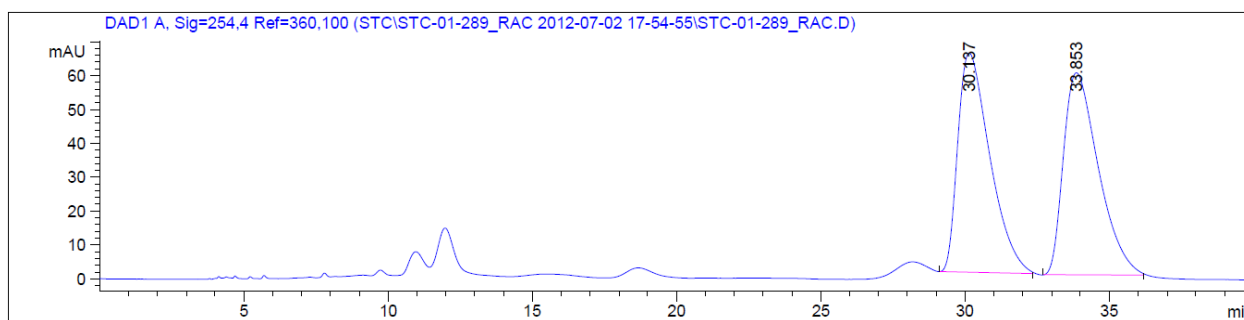

| Peak # | RetTime [min] | Type | Width [min] | Area [mAU*s] | Height [mAU] | Area %  |
|--------|---------------|------|-------------|--------------|--------------|---------|
| 1      | 30.137        | BB   | 1.1563      | 5017.29443   | 64.87373     | 49.9071 |
| 2      | 33.853        | BB   | 1.2686      | 5035.96533   | 59.79429     | 50.0929 |

**Enantioenriched:**

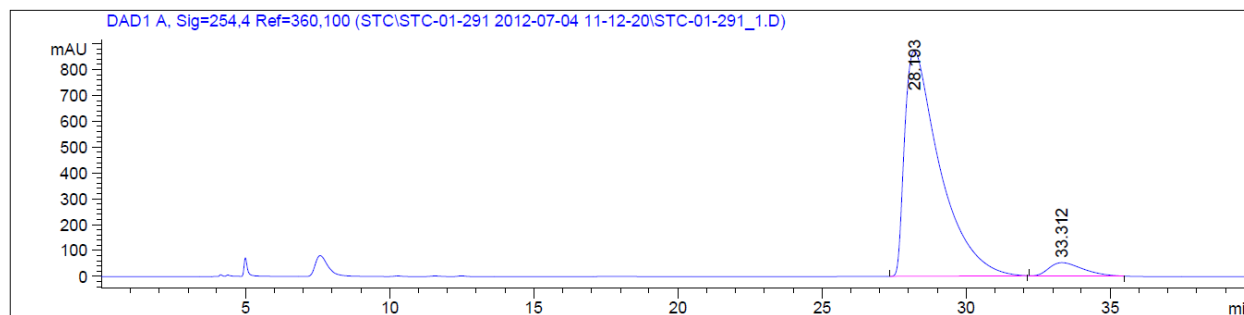

| Peak # | RetTime [min] | Type | Width [min] | Area [mAU*s] | Height [mAU] | Area %  |
|--------|---------------|------|-------------|--------------|--------------|---------|
| 1      | 28.193        | BB   | 1.2459      | 7.40842e4    | 871.41205    | 94.3717 |
| 2      | 33.312        | BB   | 1.2280      | 4418.32227   | 52.81436     | 5.6283  |

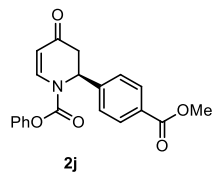

**(S)-phenyl 2-(4-(methoxycarbonyl)phenyl)-4-oxo-3,4-dihydropyridine-1(2H)-carboxylate (2j):** The zincchloride solution was prepared via method B. General procedure was followed, providing **2j** in 55% yield, 95% ee as a clear oil (Run 1). Run 2 provided 59% yield and 95% ee.

**<sup>1</sup>H NMR (500 MHz, MeOD):**  $\delta$  8.27 (d,  $J$  = 8.3 Hz, 1H), 7.41 (t,  $J$  = 7.9 Hz, 2H), 7.30 (q,  $J$  = 7.4 Hz, 2H), 7.14 (s, 2H), 6.92 – 6.87 (m, 3H), 5.91 (d,  $J$  = 6.9 Hz, 1H), 5.48 (d,  $J$  = 8.4 Hz, 1H), 3.79 (s, 3H), 3.41 – 3.29 (dd,  $J$  = obscured, 1H), 2.81 (d,  $J$  = 17.9 Hz, 1H).

**<sup>13</sup>C NMR (125 MHz, MeOD):**  $\delta$  193.46, 160.19, 150.64, 143.36, 140.06, 129.76, 129.26, 126.07, 121.09, 117.38, 112.68, 111.51, 107.66, 56.28, 54.32, 41.61.

**HRMS:** (ESI-TOF) calculated for C<sub>20</sub>H<sub>17</sub>NO<sub>5</sub> ([M+H]<sup>+</sup>): 352.1106, found: 352.1173.

**FTIR (thin film, cm<sup>-1</sup>):** 1719, 1669, 1606, 1434.

**Optical rotation:**  $[\alpha]_D^{26}$  +7.1 ( $c$  .81, CHCl<sub>3</sub>).

**HPLC:** Chiralpak OD-H, 1:4, IPA to Hexanes, 70 min run, 0.8 mL/min.

**Racemic Standard:**

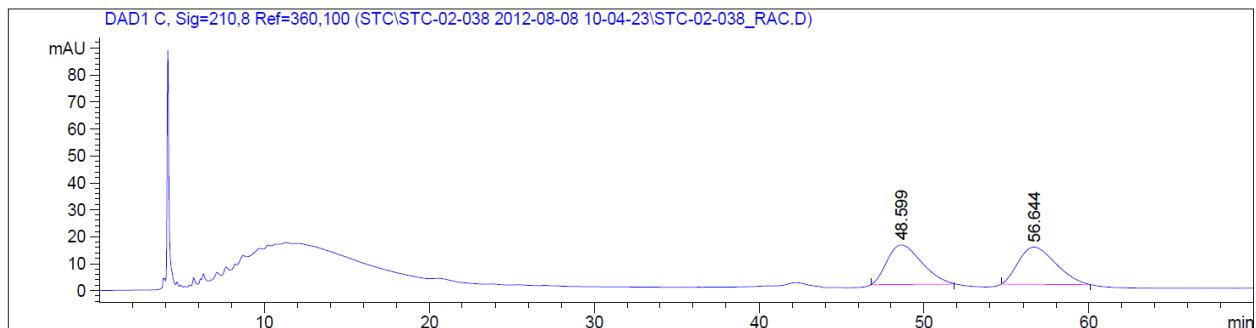

| Peak # | RetTime [min] | Type | Width [min] | Area [mAU*s] | Height [mAU] | Area %  |
|--------|---------------|------|-------------|--------------|--------------|---------|
| 1      | 48.599        | BB   | 1.7515      | 2173.97656   | 14.78479     | 49.4881 |
| 2      | 56.644        | BB   | 1.8700      | 2218.95508   | 13.93283     | 50.5119 |

**Enantioenriched:**

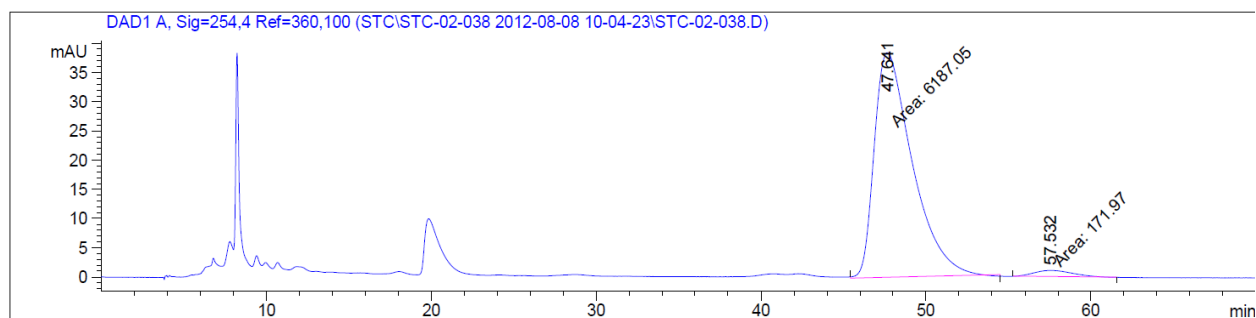

| Peak # | RetTime [min] | Type | Width [min] | Area [mAU*s] | Height [mAU] | Area %  |
|--------|---------------|------|-------------|--------------|--------------|---------|
| 1      | 47.641        | MM   | 2.6791      | 6187.04688   | 38.48969     | 97.2957 |
| 2      | 57.532        | MM   | 2.7038      | 171.96974    | 1.06005      | 2.7043  |

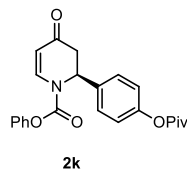

**(S)-phenyl 4-oxo-2-(4-(pivaloyloxy)phenyl)-3,4-dihydropyridine-1(2H)-carboxylate (2k):** The zincchloride solution was prepared via method B. General procedure was followed, providing **2k** in 46% yield, 82% ee as a white foam. (Run 1). Run 2 provided 39% yield and 73% ee.

**<sup>1</sup>H NMR (500 MHz, MeOD):**  $\delta$  8.29 (d,  $J$  = 8.4 Hz, 1H), 7.43 (dd,  $J$  = 12.3, 8.2 Hz, 3H), 7.30 (t,  $J$  = 7.4 Hz, 1H), 7.16 (d,  $J$  = 6.2 Hz, 3H), 7.11 (d,  $J$  = 8.5 Hz, 2H), 5.98 (d,  $J$  = 7.1 Hz, 1H), 5.51 (d,  $J$  = 8.4 Hz, 1H), 3.41 (dd,  $J$  = 16.7, 7.5 Hz, 1H), 2.85 (d,  $J$  = 16.7 Hz, 1H), 1.37 (s, 9H).

**<sup>13</sup>C NMR (125 MHz, MeOD):**  $\delta$  193.32, 177.11, 151.54, 150.83, 150.64, 143.31, 136.09, 129.24, 126.73, 126.07, 121.79, 121.11, 107.70, 55.92, 41.54, 38.69, 26.04.

**HRMS:** (ESI-TOF) calculated for C<sub>23</sub>H<sub>23</sub>NO<sub>5</sub> ([M+H]<sup>+</sup>): 394.1572, found: 394.1633.

**FTIR (thin film, cm<sup>-1</sup>):** 1738, 1670, 1606, 1507.

**Optical rotation:**  $[\alpha]_D^{26}$  +15.1 ( $c$  1.2, CHCl<sub>3</sub>).

**HPLC:** Chiralpak OD-H, 1:4, IPA to Hexanes, 50 min run, 0.8 mL/min.

**Racemic Standard:**

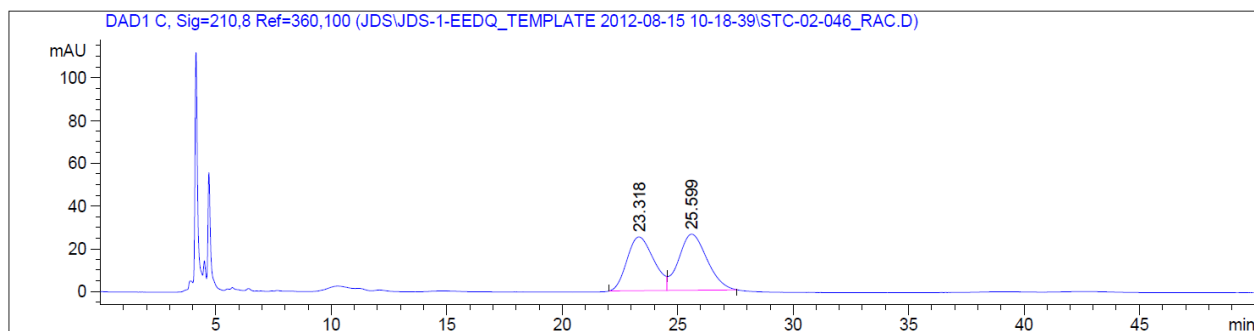

| Peak # | RetTime [min] | Type | Width [min] | Area [mAU*s] | Height [mAU] | Area %  |
|--------|---------------|------|-------------|--------------|--------------|---------|
| 1      | 23.318        | BV   | 1.1427      | 2056.16797   | 25.33927     | 47.4051 |
| 2      | 25.599        | VB   | 1.1689      | 2281.27686   | 26.43262     | 52.5949 |

**Enantioenriched:**

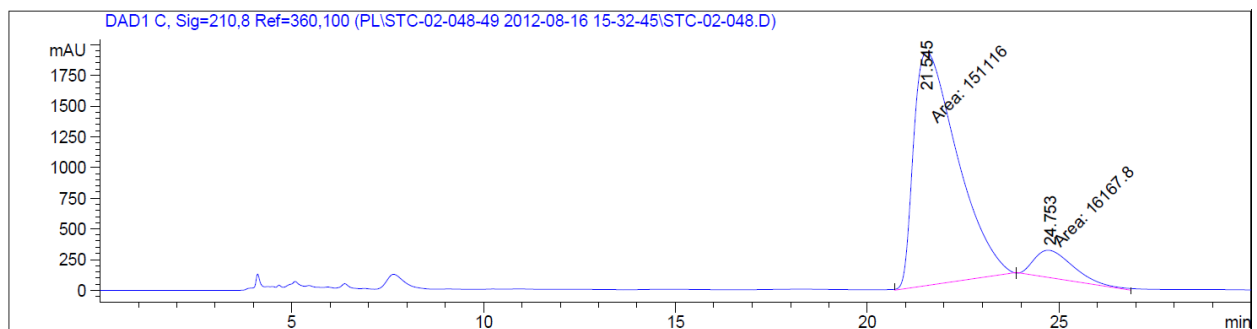

| Peak # | RetTime [min] | Type | Width [min] | Area [mAU*s] | Height [mAU] | Area %  |
|--------|---------------|------|-------------|--------------|--------------|---------|
| 1      | 21.544        | MM   | 1.2896      | 1.00250e5    | 1295.61719   | 90.9005 |
| 2      | 24.746        | MM   | 1.1576      | 1.00354e4    | 144.48186    | 9.0995  |

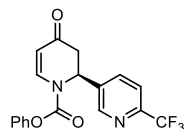

**2I**

**(S)-phenyl 4-oxo-6'-(trifluoromethyl)-3,4-dihydro-[2,3'-bipyridine]-1(2H)-carboxylate (2I):** The zincbromide solution was prepared via method A. General procedure was followed with the exception of temperature ( $-78^{\circ}\text{C}$  to rt) and the crude material was purified with flash chromatography ( $\text{SiO}_2$ ) (1:1 hexanes: EtOAc), providing **2I** in 70% yield, >99% ee as a yellow oil (Run 1). Run 2 provided 72% yield and >99% ee.

**$^1\text{H}$  NMR (500 MHz, MeOD):**  $\delta$  8.77 (s, 1H), 8.29 (d,  $J = 8.2$  Hz, 1H), 8.05 (d,  $J = 9.9$  Hz, 1H), 7.83 (d,  $J = 8.2$  Hz, 1H), 7.43 (t,  $J = 7.9$  Hz, 2H), 7.30 (t,  $J = 7.4$  Hz, 1H), 7.20 (s, 2H), 6.11 (s, 1H), 5.53 (d,  $J = 8.4$  Hz, 1H), 3.45 (dd,  $J = 16.9, 7.6$  Hz, 1H), 2.87 (d,  $J = 16.9$  Hz, 1H).

**$^{13}\text{C}$  NMR (125 MHz, MeOD):**  $\delta$  192.22 , 151.27 , 150.57 , 147.89 , 147.14 (q,  $J = 35.0$  Hz), 143.10 , 138.11 , 135.72 , 129.32 , 126.22 , 124.87 – 117.88 (q,  $J = 268.2$ ), 121.10 , 120.48 (d,  $J = 20.1$  Hz), 107.93 , 54.17 , 40.85 .

**$^{19}\text{F}$  NMR (282 MHz,  $\text{CDCl}_3$ ):**  $\delta$  -68.03.

**HRMS:** (ESI-TOF) calculated for  $\text{C}_{18}\text{H}_{13}\text{F}_3\text{N}_2\text{O}_3$  ( $[\text{M}+\text{H}]^+$ ): 363.0878, found: 363.0943.

**FTIR (thin film,  $\text{cm}^{-1}$ ):** 1735, 1669, 1605, 1493.

**Optical rotation:**  $[\alpha]_{\text{D}}^{26} -4.5$  (c 3.3,  $\text{CHCl}_3$ ).

**HPLC:** Chiralpak OD-H, 1:4, IPA to Hexanes, 70 min run, 0.8 mL/min.



**Racemic Standard:**

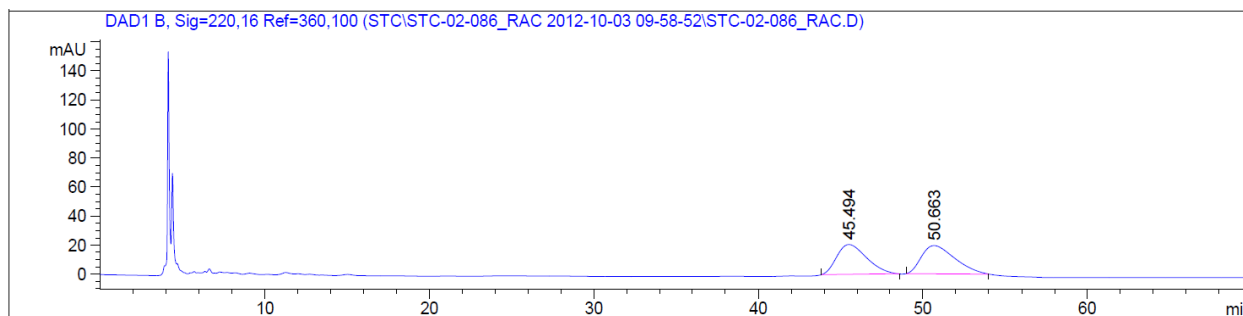

| Peak # | RetTime [min] | Type | Width [min] | Area [mAU*s] | Height [mAU] | Area %  |
|--------|---------------|------|-------------|--------------|--------------|---------|
| 1      | 45.494        | BB   | 1.5463      | 2654.69141   | 20.75353     | 48.7617 |
| 2      | 50.663        | BB   | 1.6891      | 2789.51831   | 19.54519     | 51.2383 |

**Enantioenriched:**

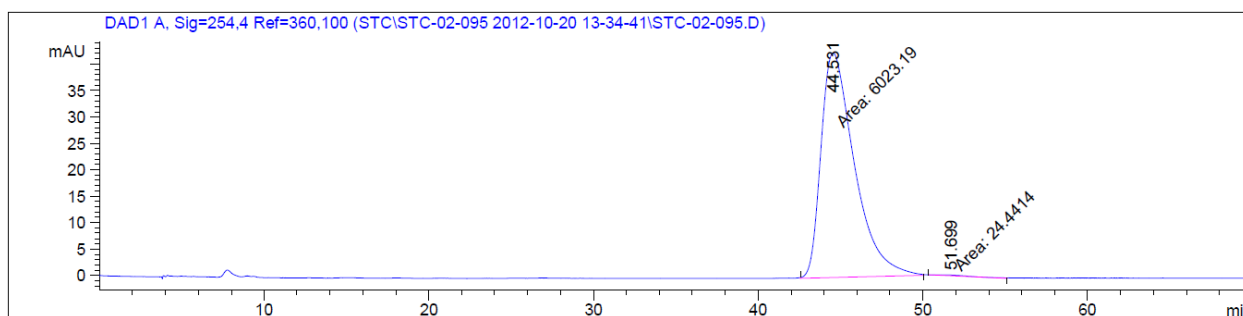

| Peak # | RetTime [min] | Type | Width [min] | Area [mAU*s] | Height [mAU] | Area %  |
|--------|---------------|------|-------------|--------------|--------------|---------|
| 1      | 44.531        | MM   | 2.3561      | 6023.19141   | 42.60728     | 99.5959 |
| 2      | 51.699        | MM   | 2.3620      | 24.44138     | 1.72464e-1   | 0.4041  |

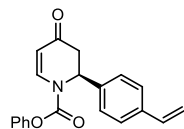

**2m**

**(S)-phenyl 4-oxo-2-(4-vinylphenyl)-3,4-dihydropyridine-1(2H)-carboxylate (2m):** The zincbromide solution was prepared via method A. General procedure was followed with the exception of temperature ( $-78^{\circ}\text{C}$  to  $-50^{\circ}\text{C}$ ) and the crude material was purified with 5%  $\text{Et}_3\text{N}$  buffered Iatrobeads 6RS-8060 silica gel, providing **2m** in 90 % yield, 52% ee as a pale yellow oil (Run 1). Run 2 provided 87% yield and 50% ee.

**$^1\text{H}$  NMR (500 MHz, MeOD):**  $\delta$  8.30 (d,  $J = 8.4$  Hz, 1H), 7.48 (d,  $J = 8.0$  Hz, 2H), 7.43 (t,  $J = 7.8$  Hz, 2H), 7.31 (dd,  $J = 15.4, 7.7$  Hz, 3H), 7.16 (s, 2H), 6.76 (dd,  $J = 17.6, 11.0$  Hz, 1H), 5.96 (d,  $J = 7.2$  Hz, 1H), 5.83 (d,  $J = 17.7$  Hz, 1H), 5.50 (d,  $J = 8.5$  Hz, 1H), 5.28 (d,  $J = 11.0$  Hz, 1H), 3.41 (dd,  $J = 16.7, 7.5$  Hz, 1H), 2.84 (d,  $J = 16.9$  Hz, 1H).

**$^{13}\text{C}$  NMR (125 MHz, MeOD):**  $\delta$  194.87, 153.02, 152.05, 144.76, 139.31, 138.85, 137.39, 130.63, 127.74, 127.45, 127.08, 122.48, 114.71, 109.09, 57.59, 42.92.

**HRMS:** (ESI-TOF) calculated for  $\text{C}_{20}\text{H}_{17}\text{NO}_3$  ( $[\text{M}+\text{H}]^+$ ): 320.1281, found: 320.1296.

**FTIR (thin film,  $\text{cm}^{-1}$ ):** 1736, 1669, 1606, 1306.

**Optical rotation:**  $[\alpha]_{\text{D}}^{26} -3.7$  ( $c$  11.6,  $\text{CHCl}_3$ ).

**HPLC:** Chiralpak OD-H, 1:4, IPA to Hexanes, 40 min run, 0.8 mL/min.

**Racemic Standard:**

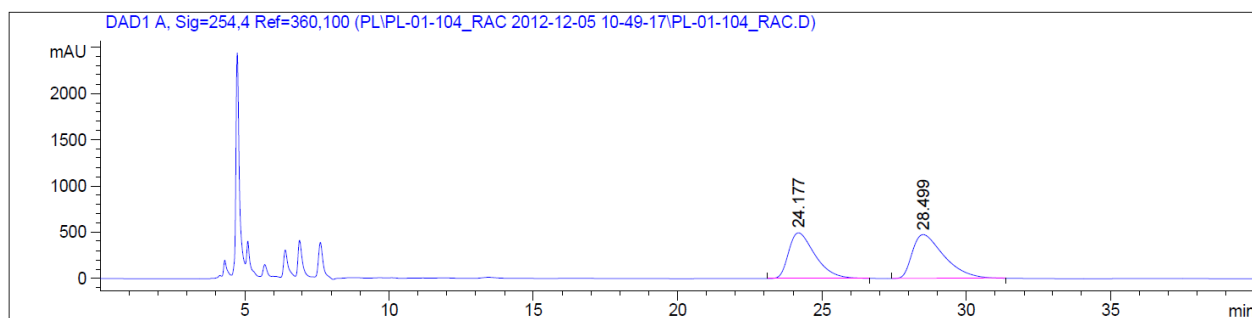

| Peak # | RetTime [min] | Type | Width [min] | Area [mAU*s] | Height [mAU] | Area %  |
|--------|---------------|------|-------------|--------------|--------------|---------|
| 1      | 24.183        | BB   | 1.0229      | 2.42971e4    | 362.07007    | 51.2368 |
| 2      | 28.498        | BB   | 1.1469      | 2.31240e4    | 302.82648    | 48.7632 |

**Enantioenriched:**

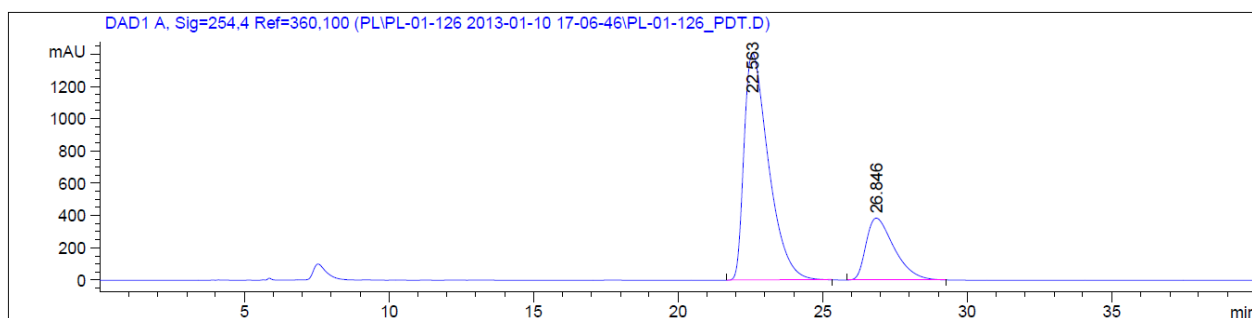

| Peak # | RetTime [min] | Type | Width [min] | Area [mAU*s] | Height [mAU] | Area %  |
|--------|---------------|------|-------------|--------------|--------------|---------|
| 1      | 22.563        | BB   | 0.8975      | 8.29257e4    | 1407.22388   | 76.2129 |
| 2      | 26.846        | BB   | 1.0184      | 2.58822e4    | 383.96167    | 23.7871 |

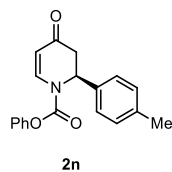

**(S)-phenyl 4-oxo-2-(p-tolyl)-3,4-dihydropyridine-1(2H)-carboxylate (2n):** The zincbromide solution was prepared via method A. General procedure was followed with the exception of temperature ( $-78^{\circ}\text{C}$  to  $-50^{\circ}\text{C}$ ), providing **2n** in 73% yield, 60% ee as a white foam (Run 1). Run 2 provided 69% yield and 53% ee.

**$^1\text{H}$  NMR (500 MHz, MeOD):**  $\delta$  8.26 (d,  $J = 8.3$  Hz, 1H), 7.41 (t,  $J = 7.8$  Hz, 2H), 7.29 (t,  $J = 7.4$  Hz, 1H), 7.24 – 7.18 (m, 4H), 7.14 (s, 2H), 5.90 (d,  $J = 6.5$  Hz, 1H), 5.47 (d,  $J = 8.3$  Hz, 1H), 3.37 – 3.27 (dd,  $J =$  obscured, 1H), 2.80 (d,  $J = 16.6$  Hz, 1H), 2.33 (s, 3H).

**$^{13}\text{C}$  NMR (125 MHz, MeOD):**  $\delta$  195.29, 153.30, 152.32, 145.01, 139.28, 137.08, 130.91, 130.85, 127.72, 127.03, 122.77, 109.33, 57.83, 43.32, 21.35.

**HRMS:** (ESI-TOF) calculated for  $\text{C}_{19}\text{H}_{17}\text{NO}_3$  ( $[\text{M}+\text{H}]^+$ ): 308.1208, found: 308.1271.

**FTIR (thin film,  $\text{cm}^{-1}$ ):** 1733, 1667, 1604, 1494.

**Optical rotation:**  $[\alpha]_{\text{D}}^{26} -24.8$  ( $c$  .77,  $\text{CHCl}_3$ ).

**HPLC:** Chiralpak OD-H, 1:4, IPA to Hexanes, 30 min run, 0.8 mL/min.

**Racemic Standard:**

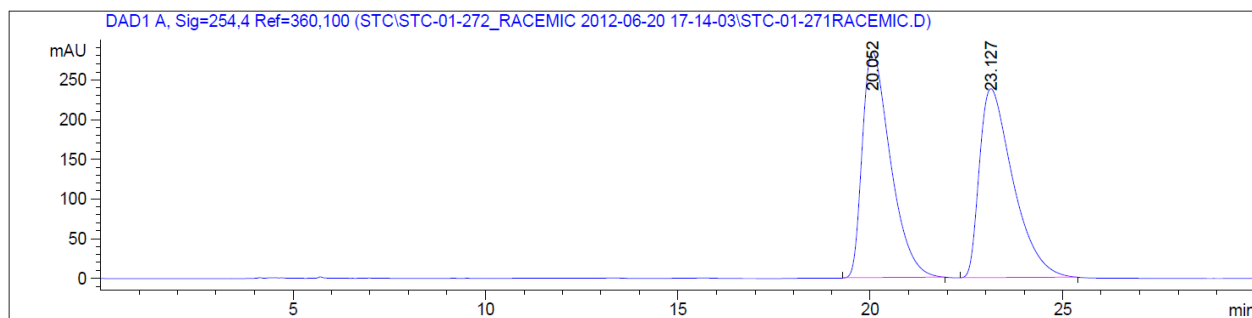

| Peak # | RetTime [min] | Type | Width [min] | Area [mAU*s] | Height [mAU] | Area %  |
|--------|---------------|------|-------------|--------------|--------------|---------|
| 1      | 20.052        | BB   | 0.7784      | 1.45172e4    | 284.96182    | 50.0850 |
| 2      | 23.127        | BB   | 0.9090      | 1.44680e4    | 238.08754    | 49.9150 |

**Enantioenriched:**

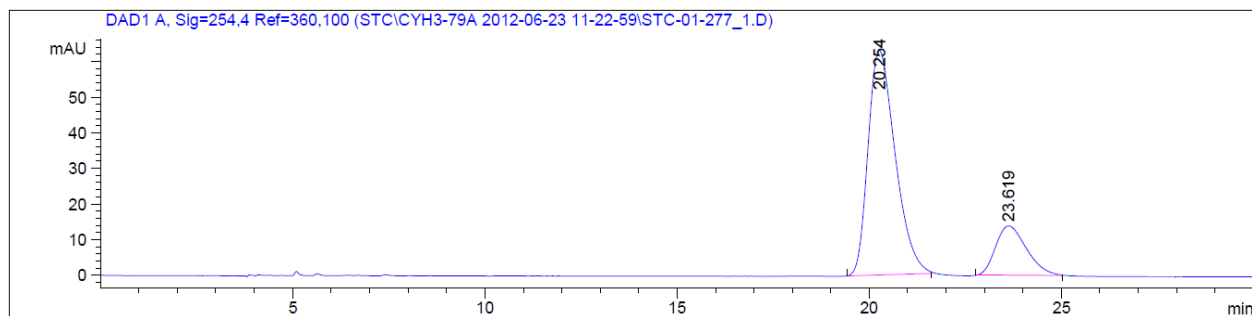

| Peak # | RetTime [min] | Type | Width [min] | Area [mAU*s] | Height [mAU] | Area %  |
|--------|---------------|------|-------------|--------------|--------------|---------|
| 1      | 20.254        | BB   | 0.7535      | 3101.86646   | 63.09587     | 79.9411 |
| 2      | 23.619        | BB   | 0.8296      | 778.32428    | 13.89206     | 20.0589 |

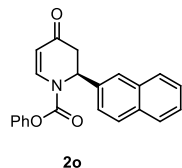

**(S)-phenyl 2-(naphthalen-2-yl)-4-oxo-3,4-dihydropyridine-1(2H)-carboxylate (2o):** The zincbromide solution was prepared via method A. General procedure was followed, providing **2o** in 57% yield, 83% ee as a white solid (Run 1). Run 2 provided 51% yield and 79% ee.

**<sup>1</sup>H NMR (500 MHz, MeOD):**  $\delta$  8.38 (d,  $J$  = 8.4 Hz, 1H), 7.93 (d,  $J$  = 8.6 Hz, 1H), 7.89 – 7.85 (m, 2H), 7.79 (s, 1H), 7.56 – 7.48 (m, 3H), 7.41 (t,  $J$  = 7.8 Hz, 2H), 7.29 (t,  $J$  = 7.4 Hz, 1H), 7.14 (s, 2H), 6.13 (d,  $J$  = 7.0 Hz, 1H), 5.54 (d,  $J$  = 8.4 Hz, 1H), 3.49 (dd,  $J$  = 16.7, 7.5 Hz, 1H), 2.97 (d,  $J$  = 16.7 Hz, 1H).

**<sup>13</sup>C NMR (125 MHz, MeOD):**  $\delta$  195.20, 153.38, 152.36, 145.17, 137.40, 134.94, 134.65, 130.92, 130.37, 129.31, 128.96, 127.95, 127.74, 125.76, 125.13, 122.78, 109.47, 58.20, 43.22 (1 carbon overlap).

**HRMS:** (ESI-TOF) calculated for C<sub>22</sub>H<sub>17</sub>NO<sub>3</sub> ([M+H]<sup>+</sup>): 344.1195, found: 344.1268.

**FTIR (thin film, cm<sup>-1</sup>):** 1736, 1669, 1606, 1494.

**Optical rotation:**  $[\alpha]_D^{26}$  +6.4 ( $c$  .93, CHCl<sub>3</sub>).

**Melting point:** 130-132°C.

**HPLC:** Chiralpak OD-H, 1:4, IPA to Hexanes, 50 min run, 0.8 mL/min.

**Racemic standard:**

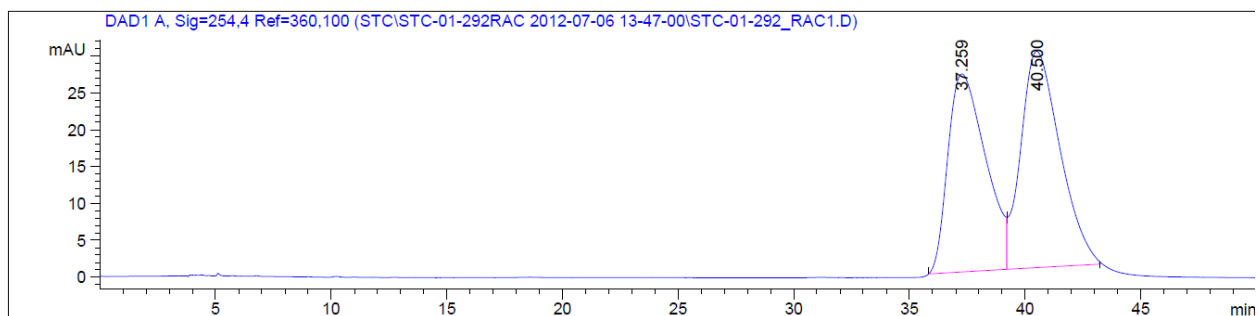

| Peak # | RetTime [min] | Type | Width [min] | Area [mAU*s] | Height [mAU] | Area %  |
|--------|---------------|------|-------------|--------------|--------------|---------|
| 1      | 37.259        | BV   | 1.5268      | 3053.40234   | 26.89025     | 46.7997 |
| 2      | 40.500        | VB   | 1.5351      | 3470.99976   | 29.36287     | 53.2003 |

**Enantioenriched:**

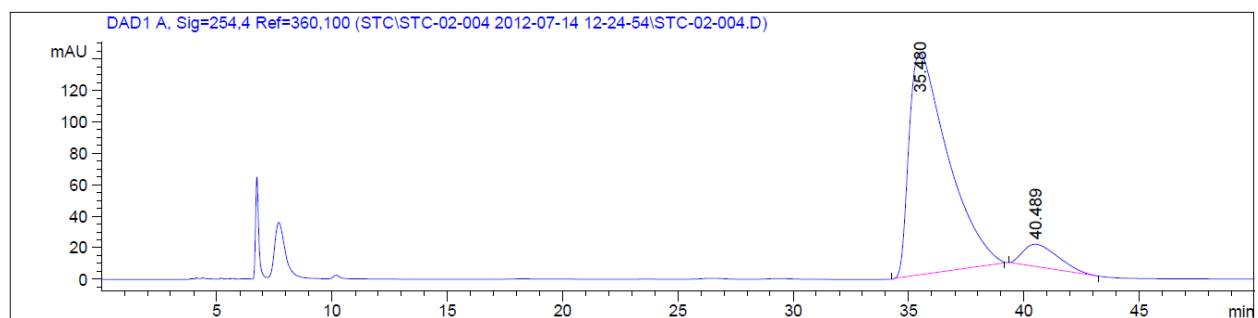

| Peak # | RetTime [min] | Type | Width [min] | Area [mAU*s] | Height [mAU] | Area %  |
|--------|---------------|------|-------------|--------------|--------------|---------|
| 1      | 35.480        | BB   | 1.6748      | 1.65945e4    | 141.23099    | 91.5831 |
| 2      | 40.489        | BB   | 1.2849      | 1525.11084   | 14.24687     | 8.4169  |

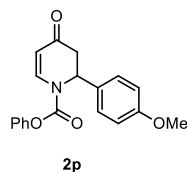

**Phenyl 2-(4-methoxyphenyl)-4-oxo-3,4-dihydropyridine-1(2H)-carboxylate (2p):** The zincbromide solution was prepared via method A. General procedure was followed, providing **2p** in 77% yield, 0% ee as a clear oil. Attempts to increase the selectivity included performing syringe pump addition of the nucleophile, the addition of additives including 1,4-dioxane, dimethoxyethane, and using different types of zinc based nucleophiles including (4-OMePh)<sub>2</sub>Zn, 4-OMePhZnEt, 4-OMePhZnCl·LiCl, and salt free (4-MeO)<sub>2</sub>Zn provided only racemic **2p**.

**<sup>1</sup>H NMR (500 MHz, MeOD):** δ 8.23 (d, *J* = 8.2 Hz, 1H), 7.42 (t, *J* = 7.8 Hz, 2H), 7.28 (dd, *J* = 16.2, 8.1 Hz, 3H), 7.15 (d, *J* = 7.9 Hz, 2H), 7.03 – 6.91 (m, 2H), 5.87 (d, *J* = 7.2 Hz, 1H), 5.47 (d, *J* = 8.3 Hz, 1H), 3.78 (s, 3H), 3.31 (dd, *J* = 16.6, 7.4 Hz, 1H), 2.79 (dt, *J* = 16.5, 1.6 Hz, 1H).

**<sup>13</sup>C NMR (125 MHz, MeOD):** δ 193.73, 159.46, 151.60, 150.66, 143.24, 130.36, 129.27, 126.81, 126.06, 121.13, 113.89, 107.61, 55.87, 54.36, 41.65.

**HRMS:** (ESI-TOF) calculated for C<sub>19</sub>H<sub>17</sub>NO<sub>4</sub> ([M+H]<sup>+</sup>): 324.1157, found: 324.1191.

**FTIR (thin film, cm<sup>-1</sup>):** 1735, 1665, 1605, 1440.

**Optical rotation:** N/A.

**HPLC:** Chiralpak OD-H, 1:4, IPA to Hexanes, 40 min run, 0.8 mL/min.



**Racemic Standard:**

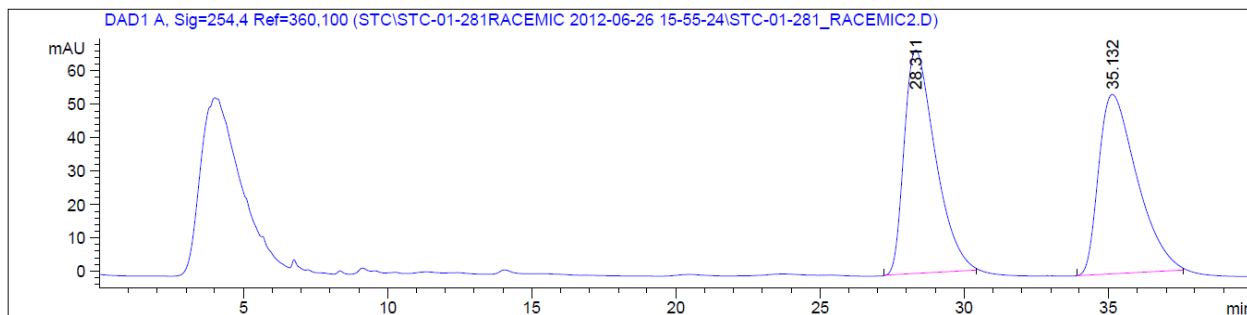

| Peak # | RetTime [min] | Type | Width [min] | Area [mAU*s] | Height [mAU] | Area %  |
|--------|---------------|------|-------------|--------------|--------------|---------|
| 1      | 28.311        | BB   | 1.1318      | 5046.63330   | 67.07098     | 50.4528 |
| 2      | 35.132        | BB   | 1.3340      | 4956.03955   | 53.73827     | 49.5472 |

**Enantioenriched:**

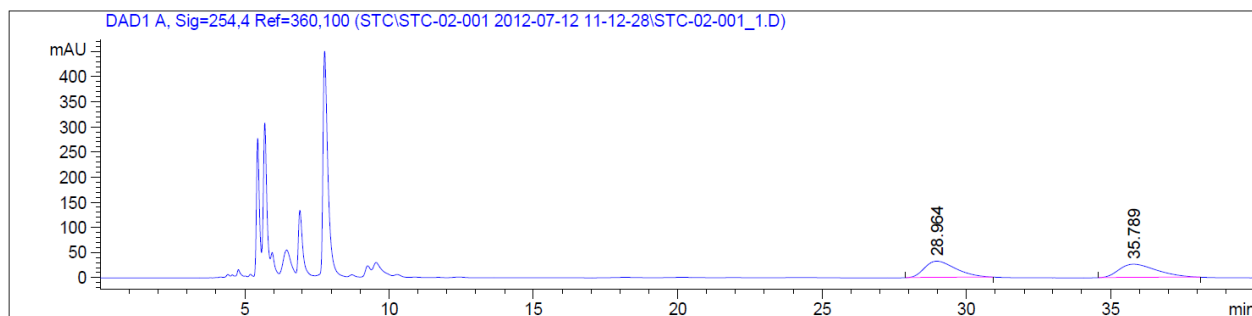

| Peak # | RetTime [min] | Type | Width [min] | Area [mAU*s] | Height [mAU] | Area %  |
|--------|---------------|------|-------------|--------------|--------------|---------|
| 1      | 28.964        | BB   | 1.1408      | 2520.69043   | 32.86661     | 50.2759 |
| 2      | 35.789        | BB   | 1.2997      | 2493.02710   | 26.78967     | 49.7241 |

### V. NMR Spectra

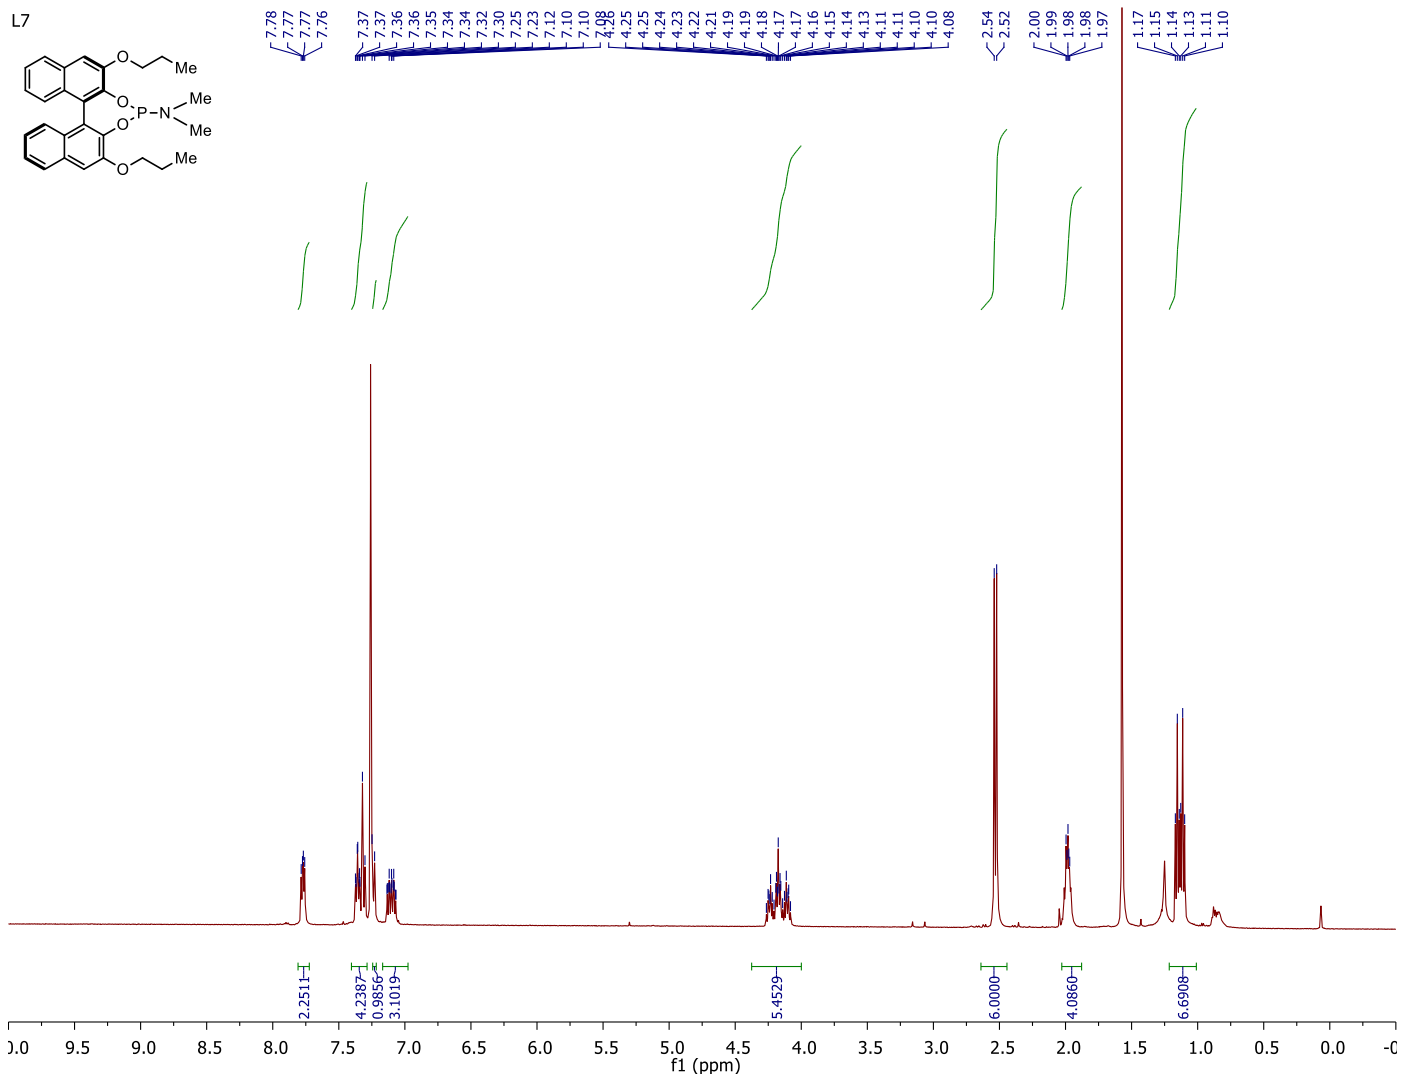

500 MHz  $^1\text{H}$ -NMR spectrum of **L7** in  $\text{CDCl}_3$

L7

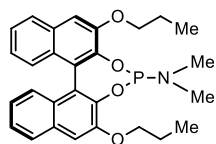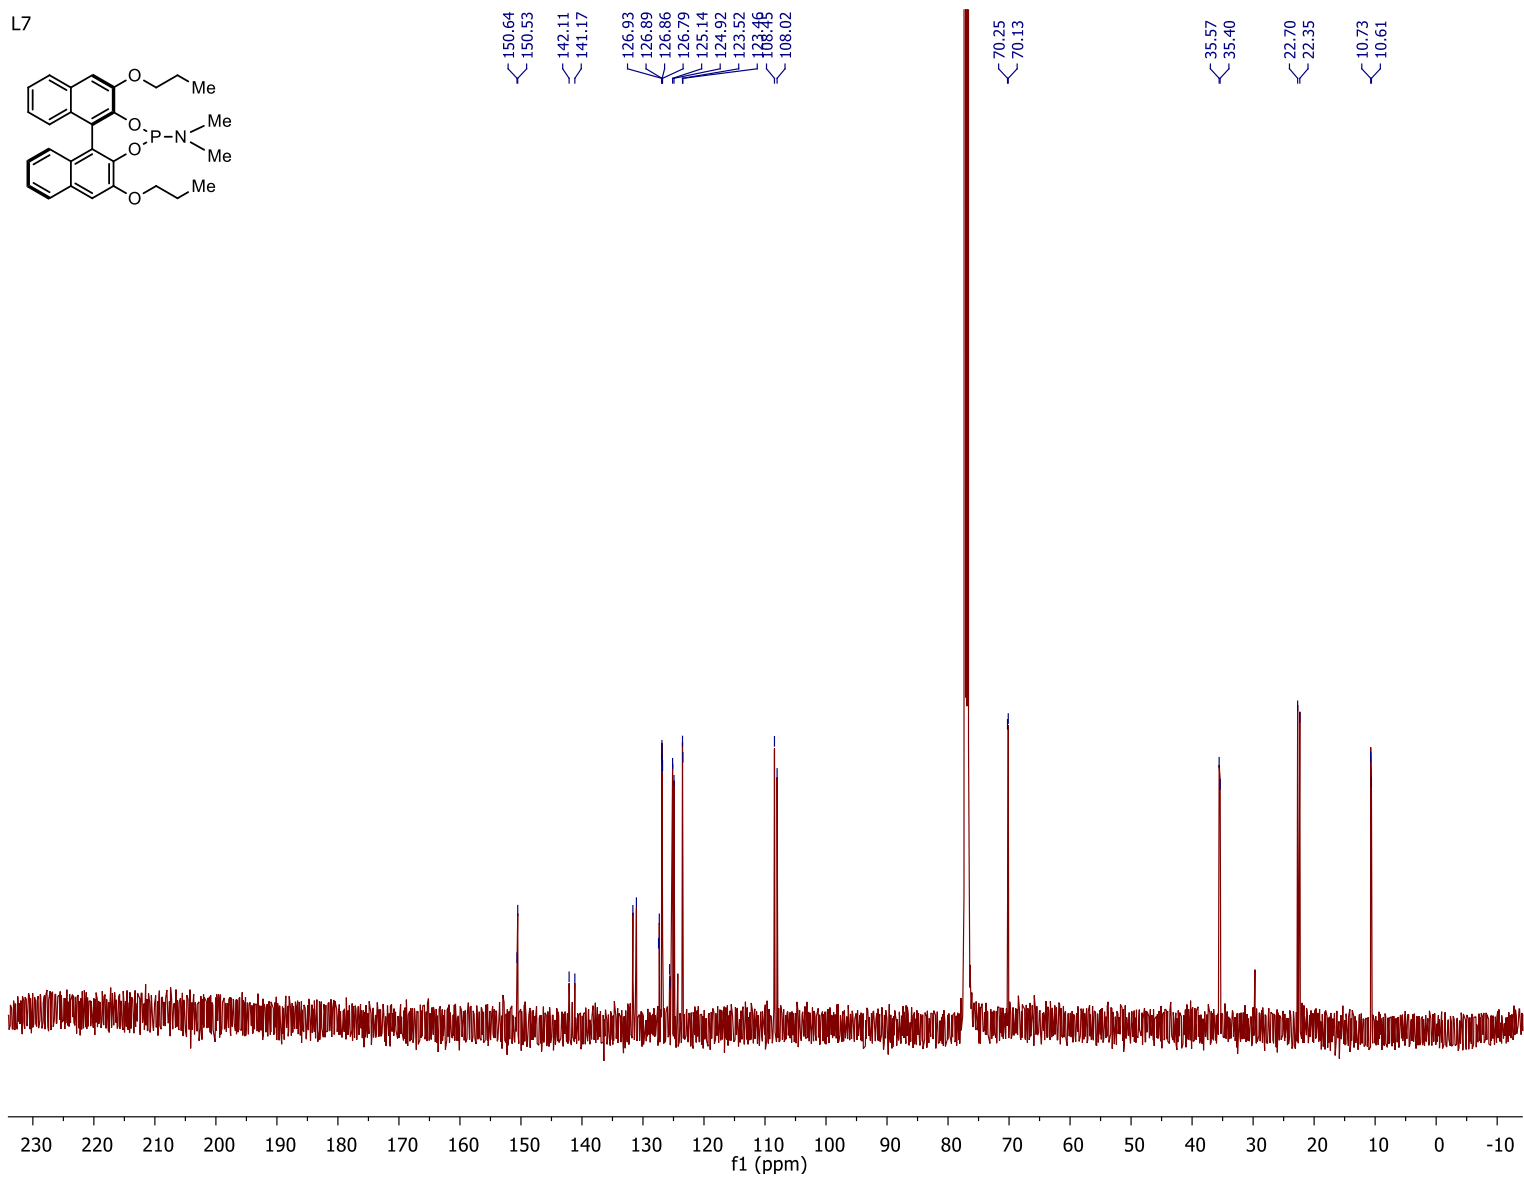

125 MHz  $^{13}\text{C}$ -NMR spectrum of **L7** in  $\text{CDCl}_3$

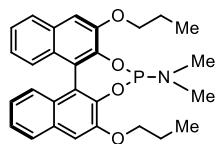

L7

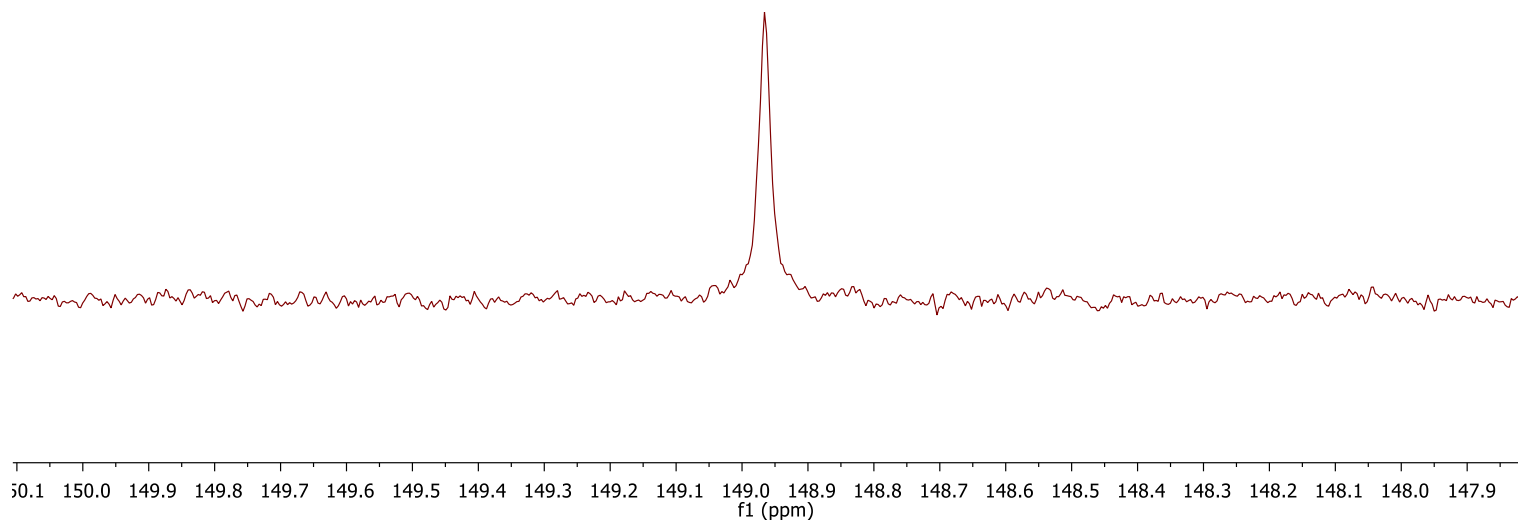

121 MHz  $^{31}\text{P}$ -NMR spectrum of L7 in  $\text{CDCl}_3$

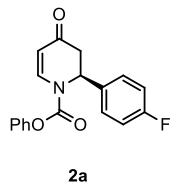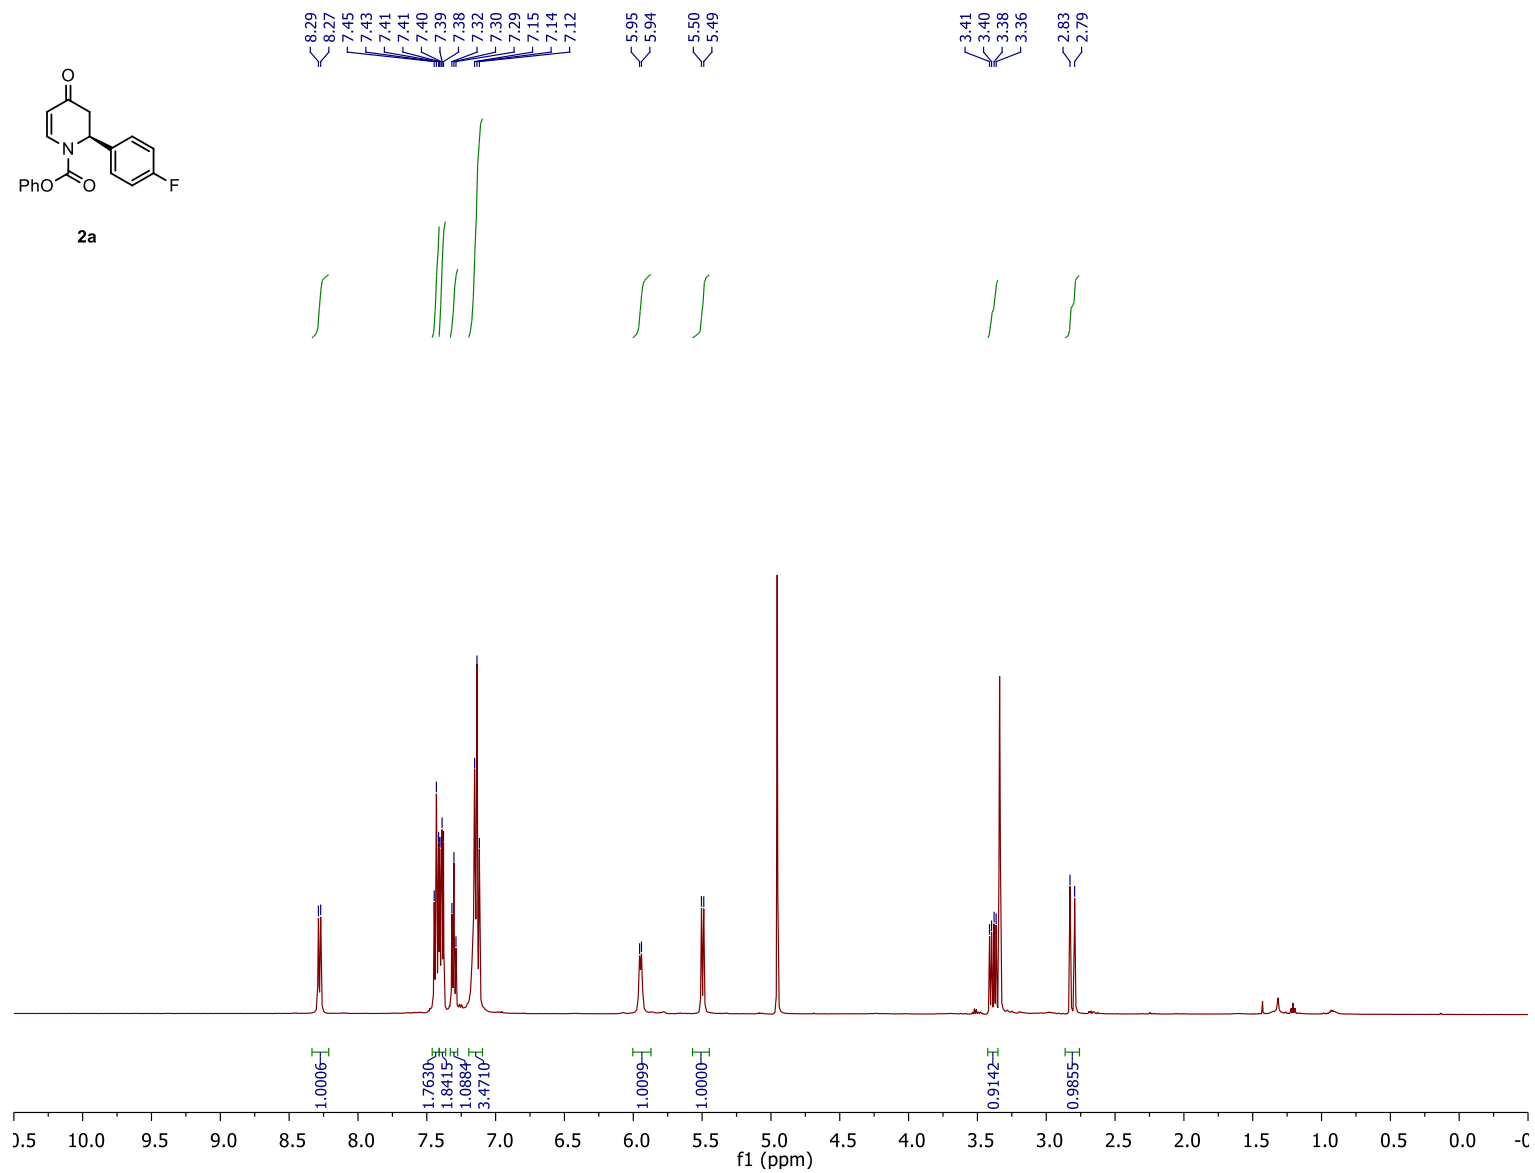

500 MHz <sup>1</sup>H-NMR spectrum of **2a** in MeOD

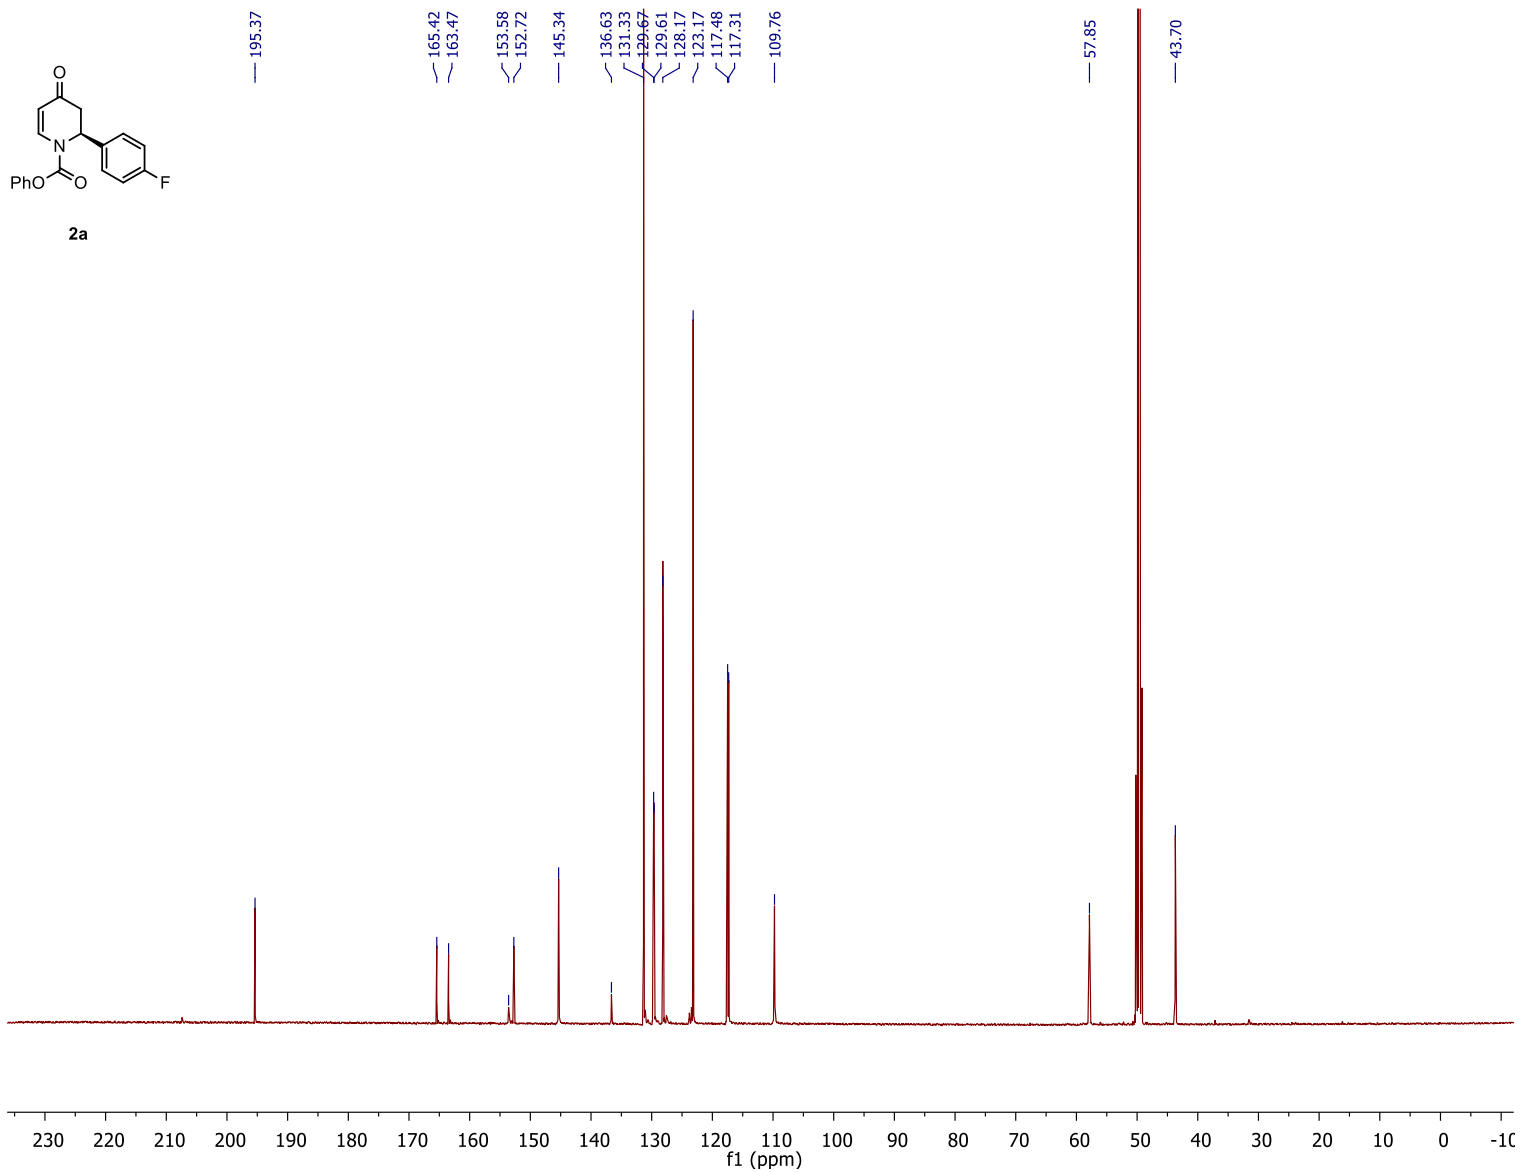

125 MHz  $^{13}\text{C}$ -NMR spectrum of **2a** in MeOD

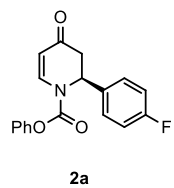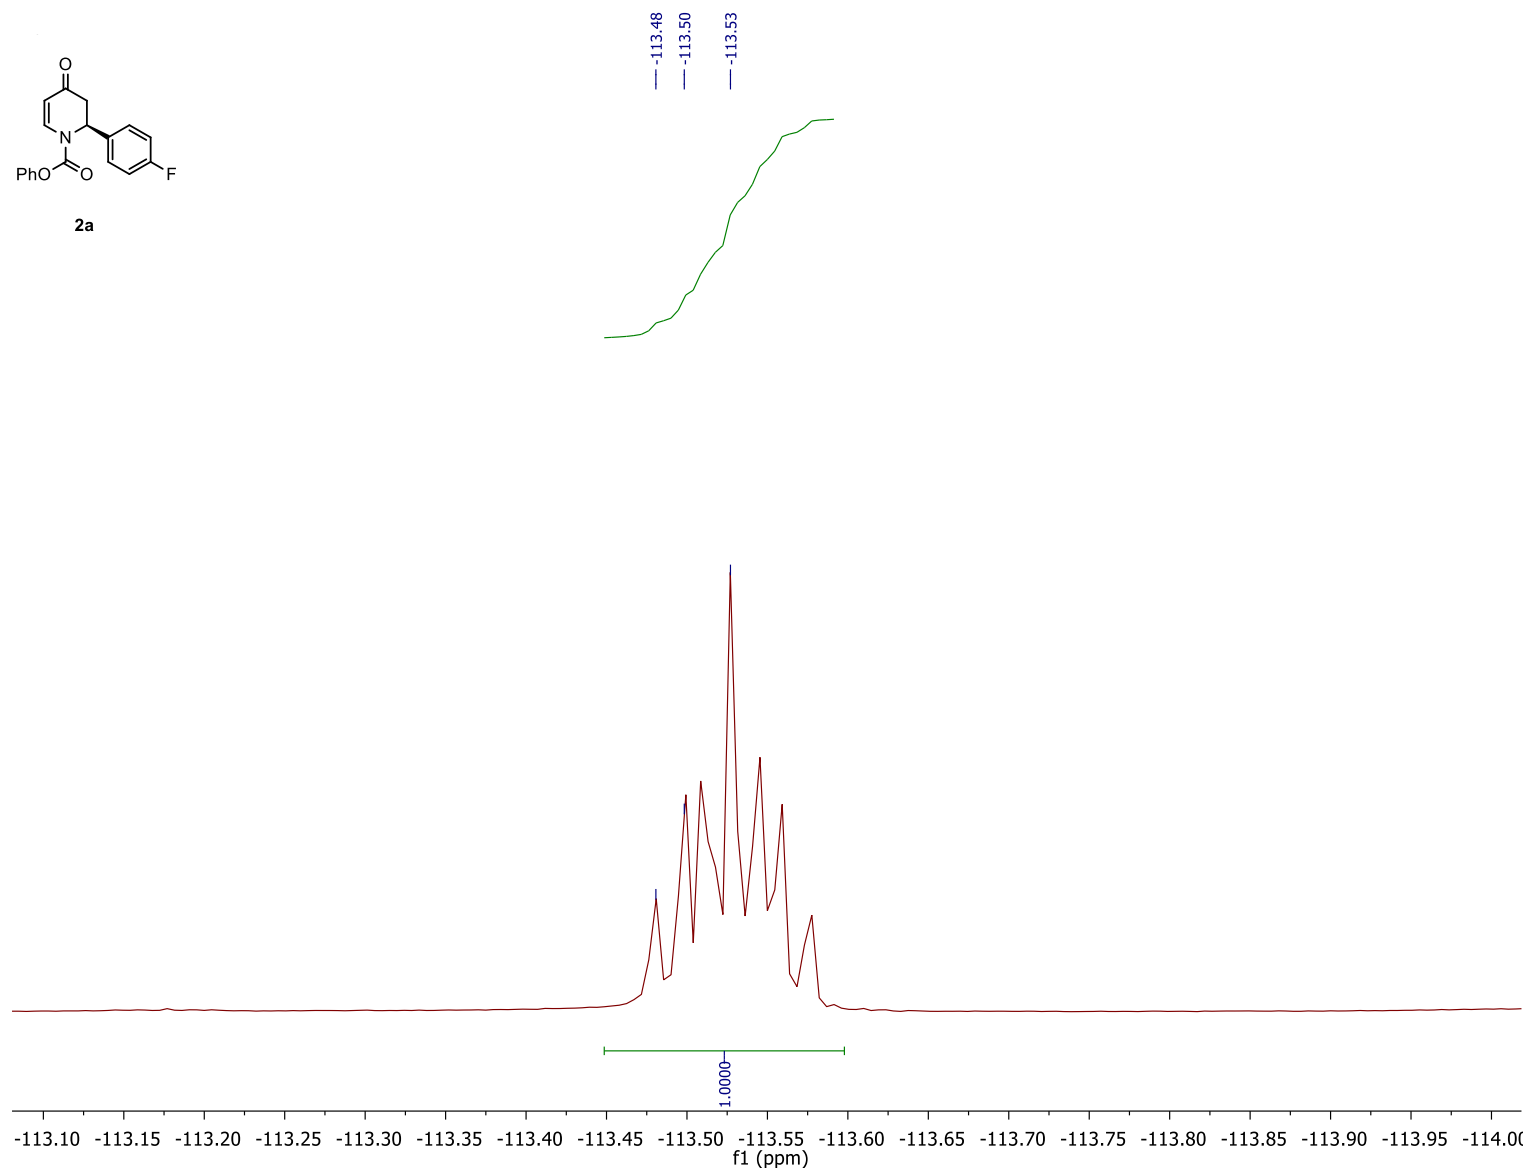

282 MHz  $^{19}\text{F}$  NMR spectrum of **2a** in MeOD

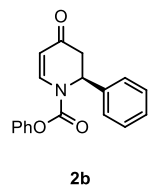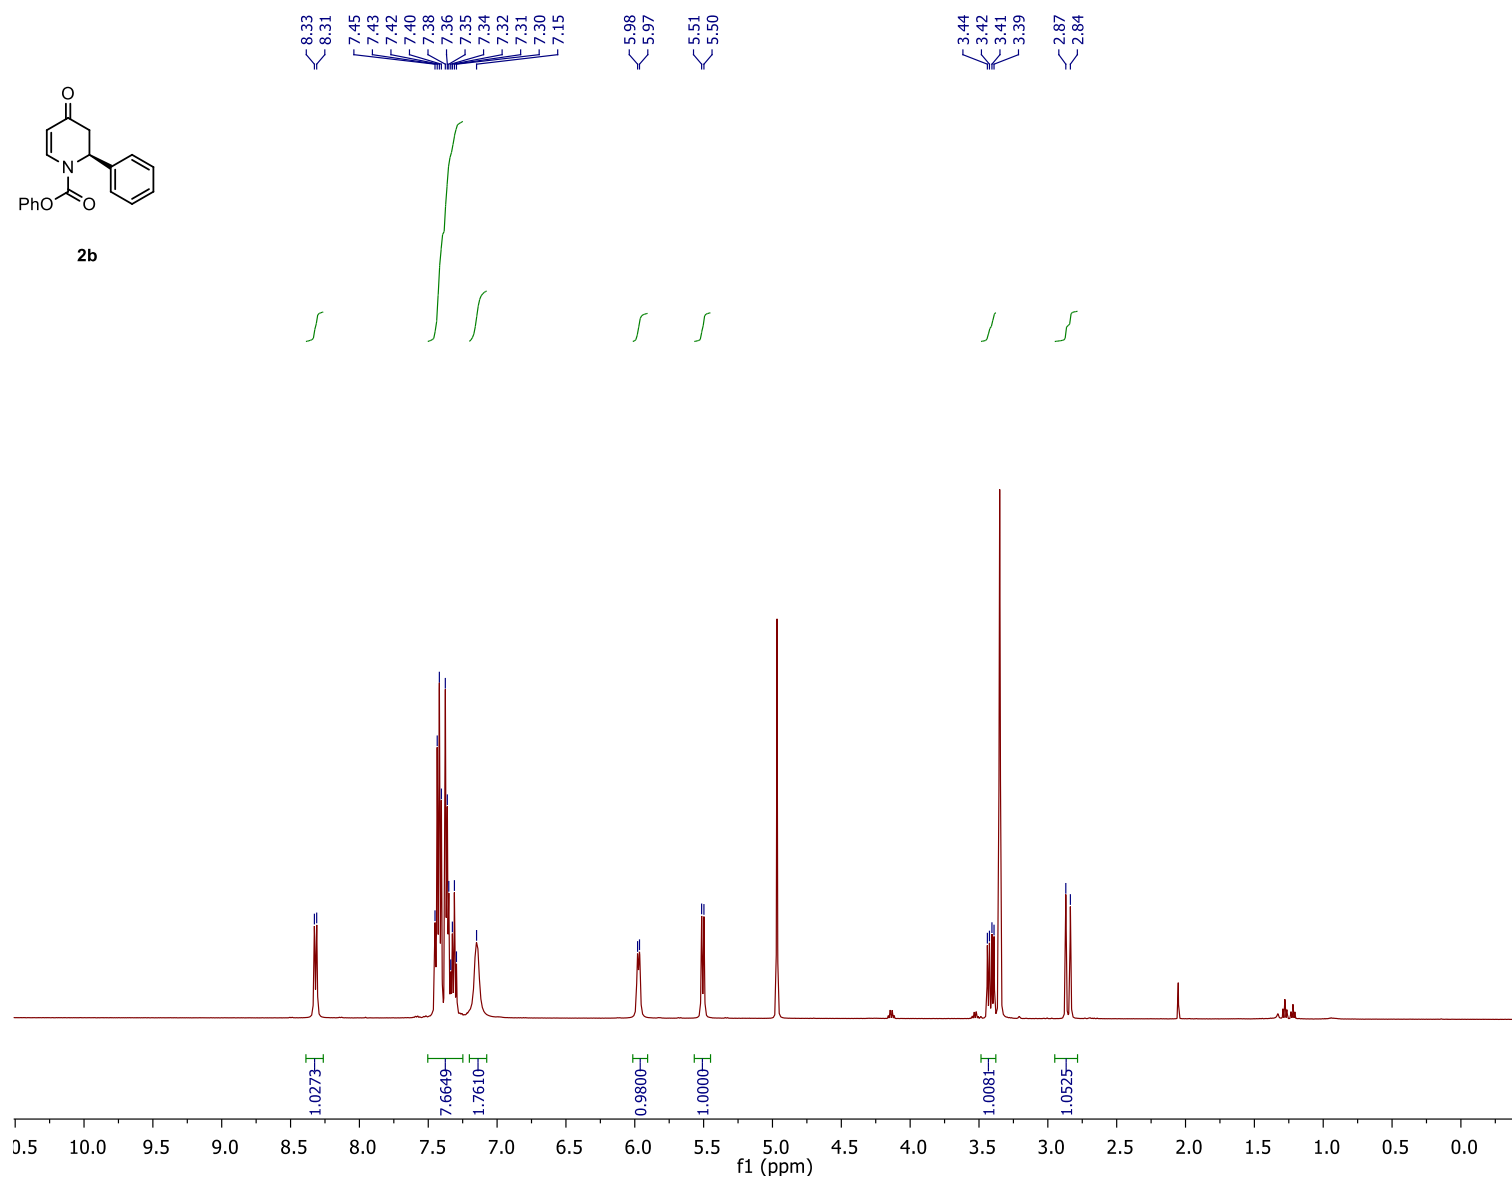

500 MHz  $^1\text{H}$ -NMR spectrum of **2b** in MeOD



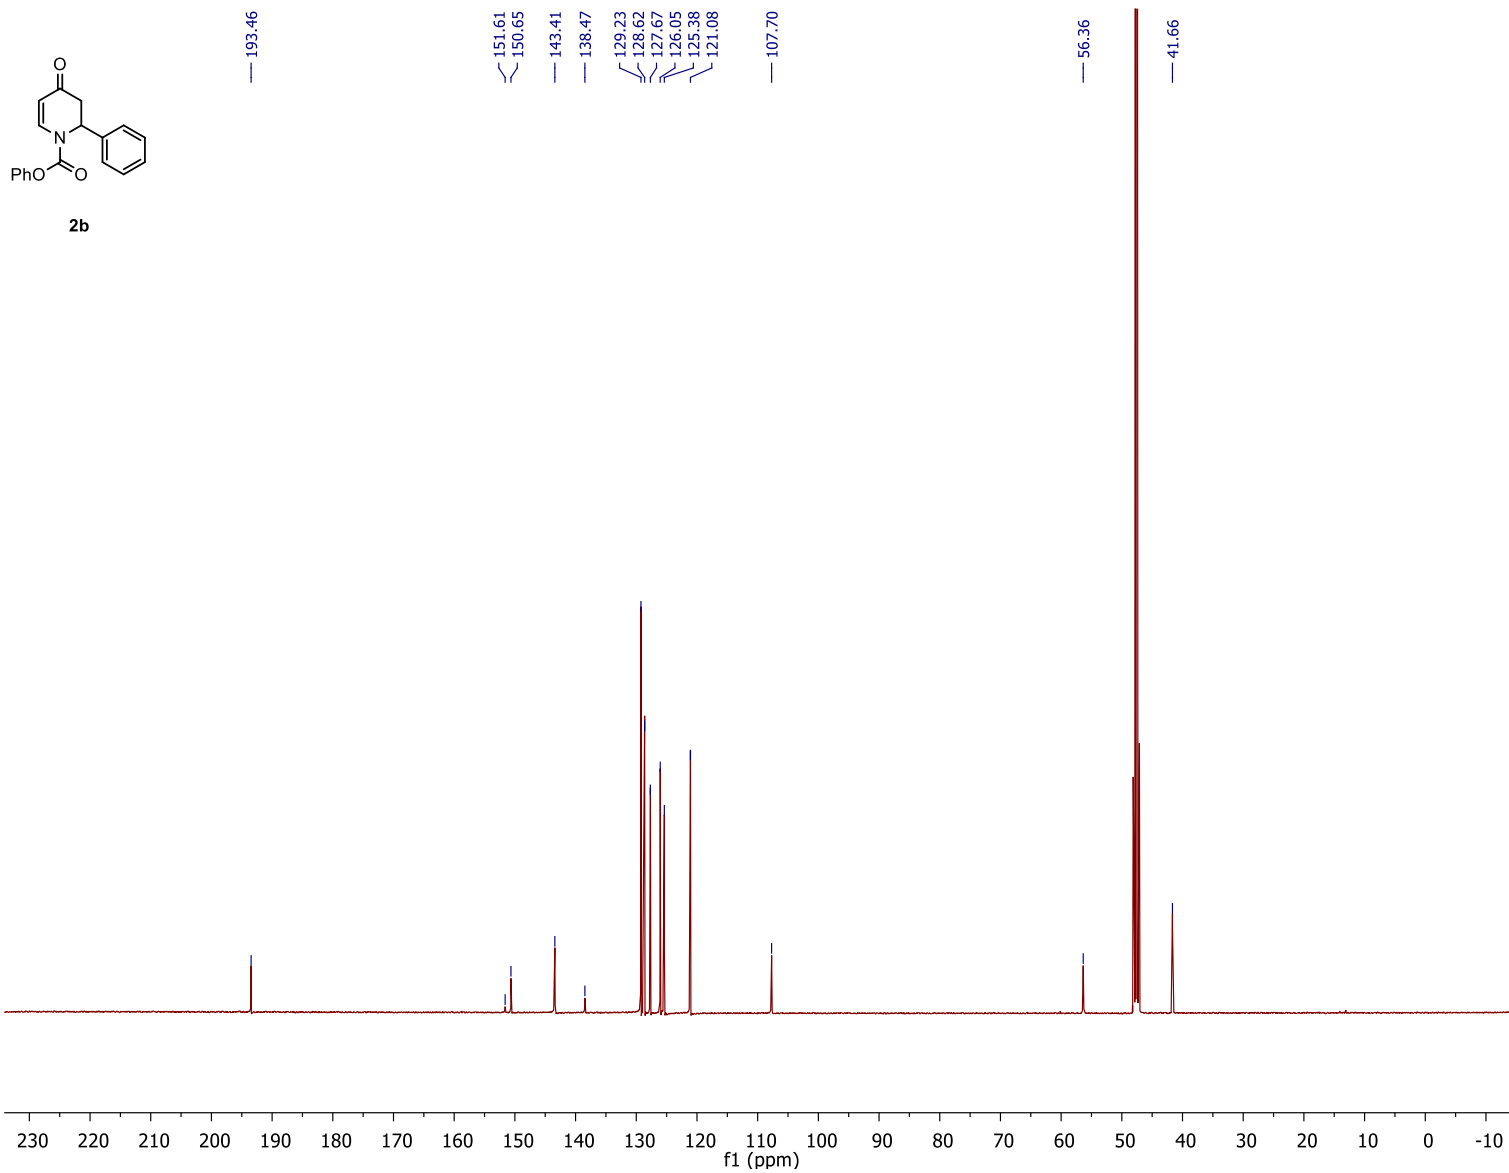

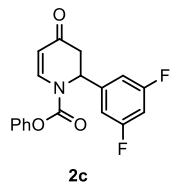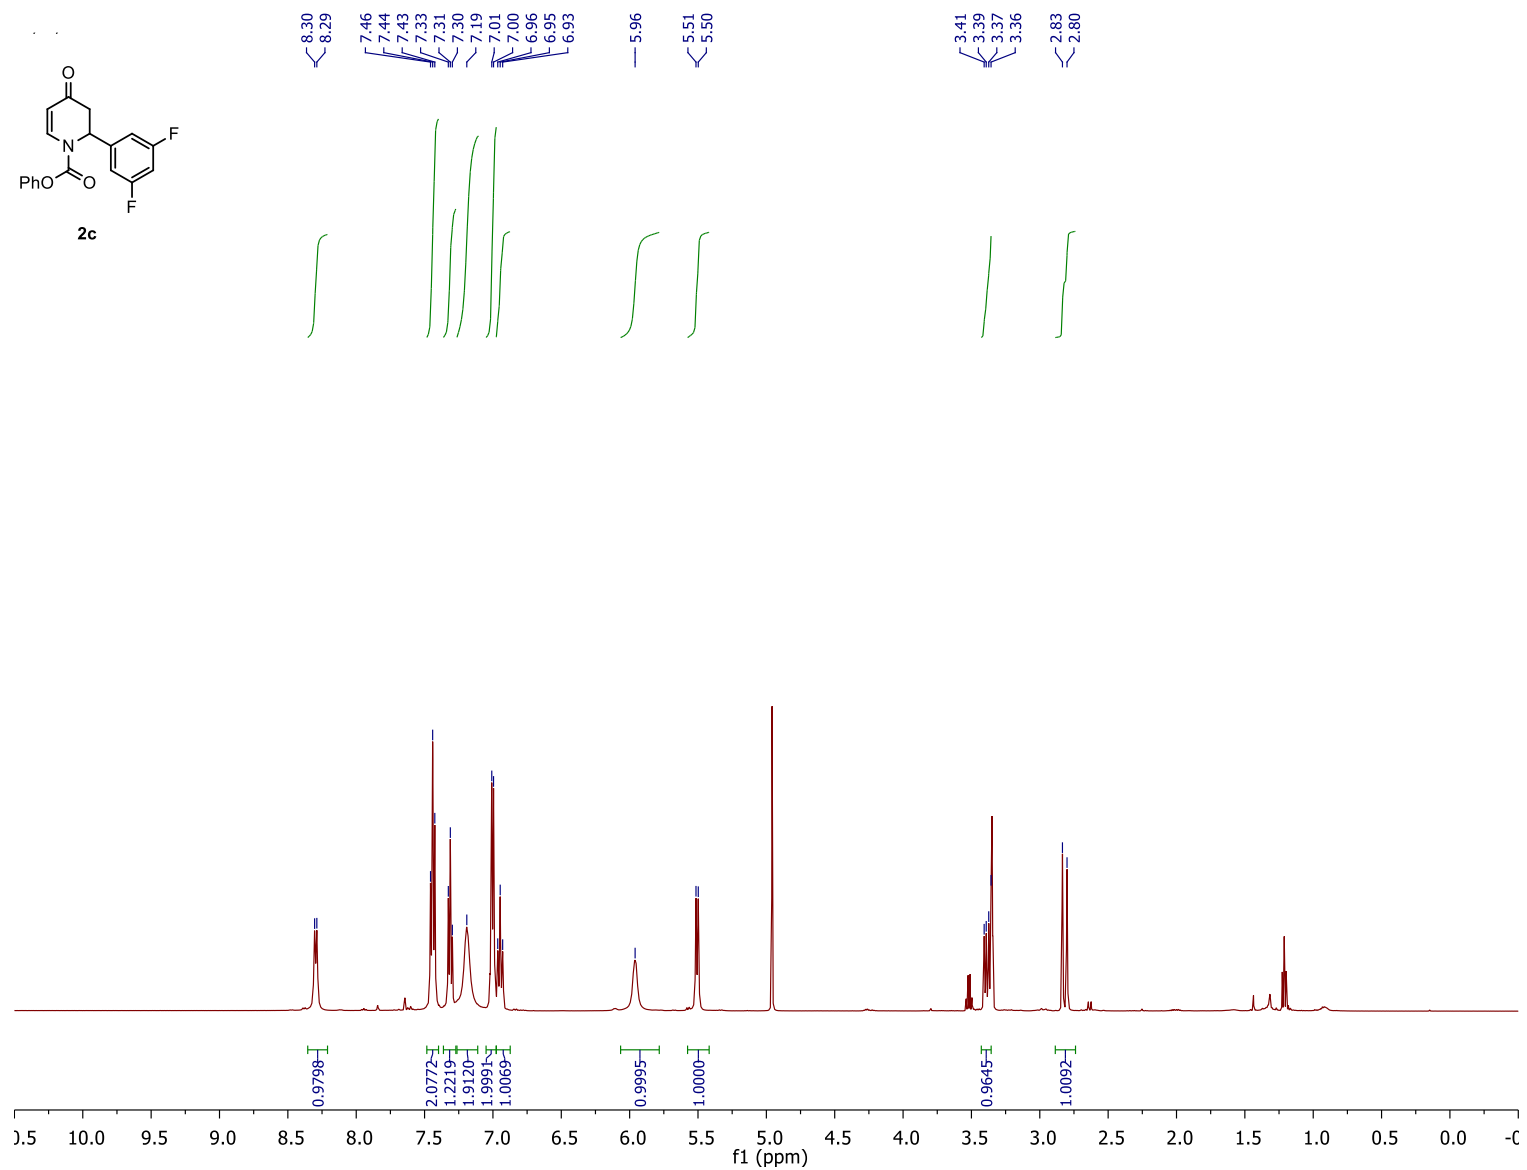

500 MHz  $^1\text{H}$ -NMR spectrum of 2c in MeOD

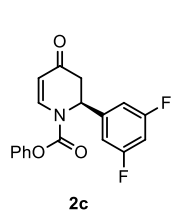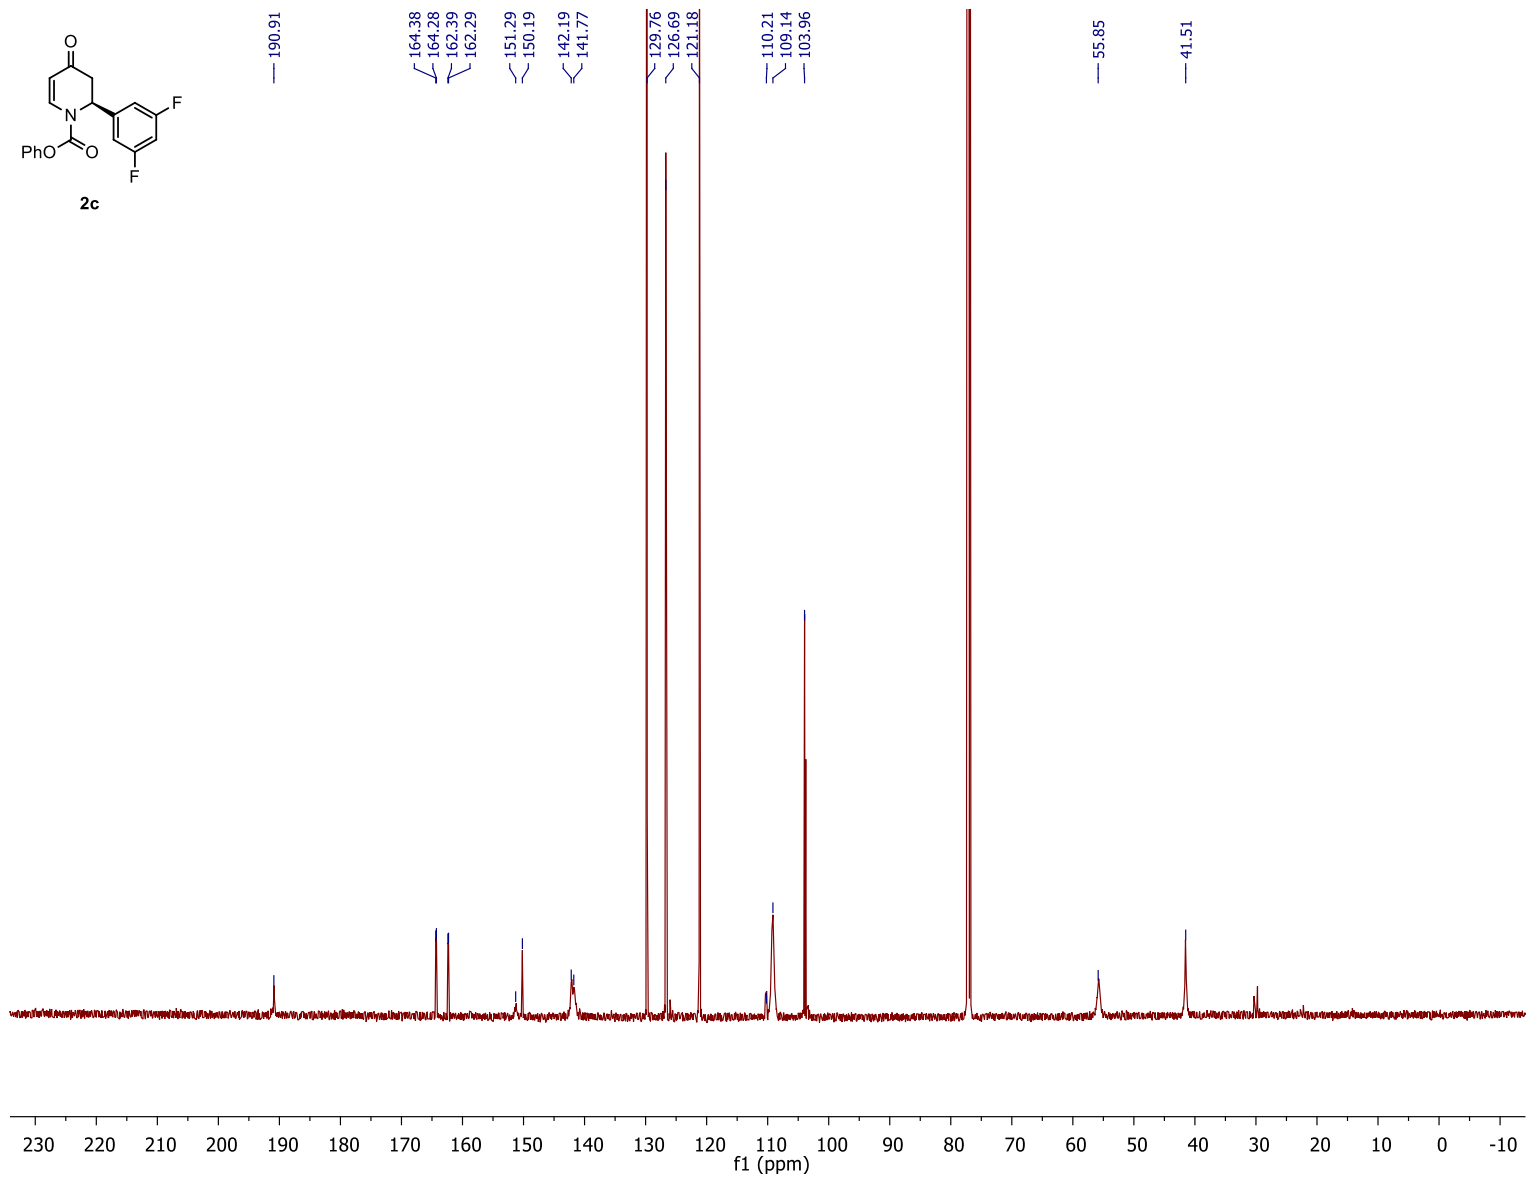

125 MHz  $^{13}\text{C}$ -NMR spectrum of **2c** in  $\text{CDCl}_3$

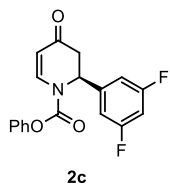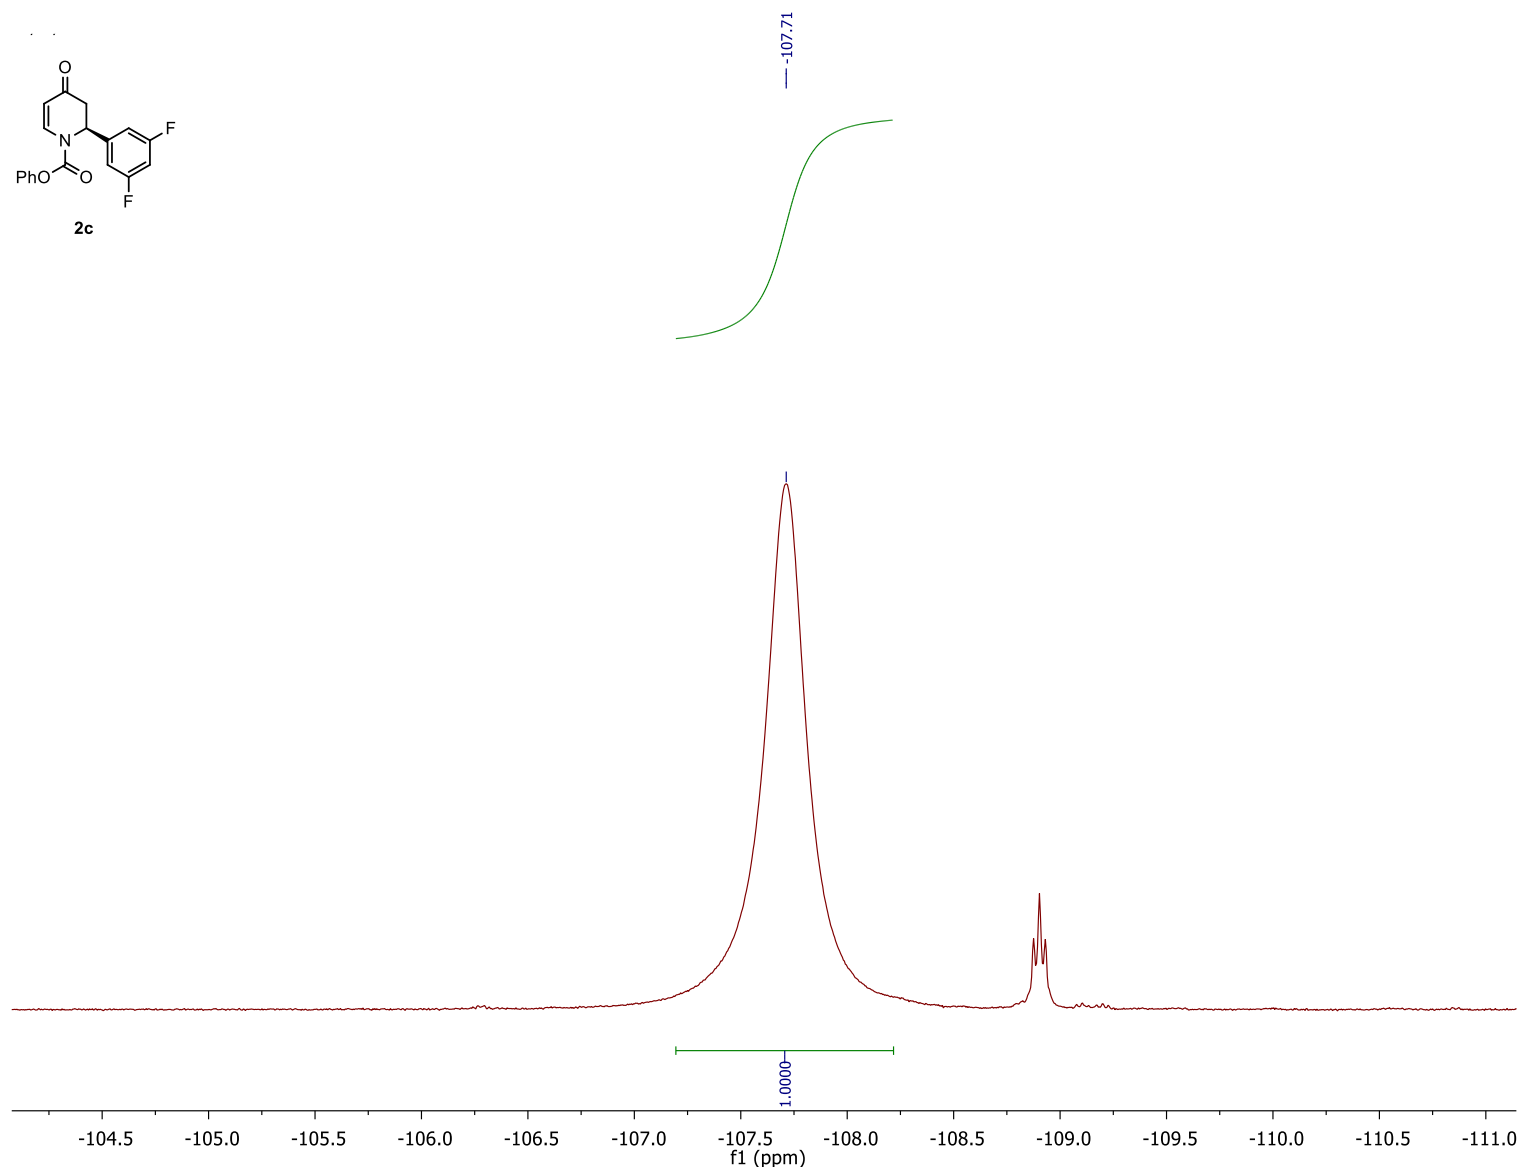

282 MHz  $^{19}\text{F}$  NMR spectrum of **2c** in MeOD

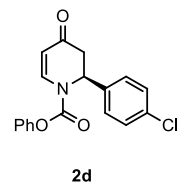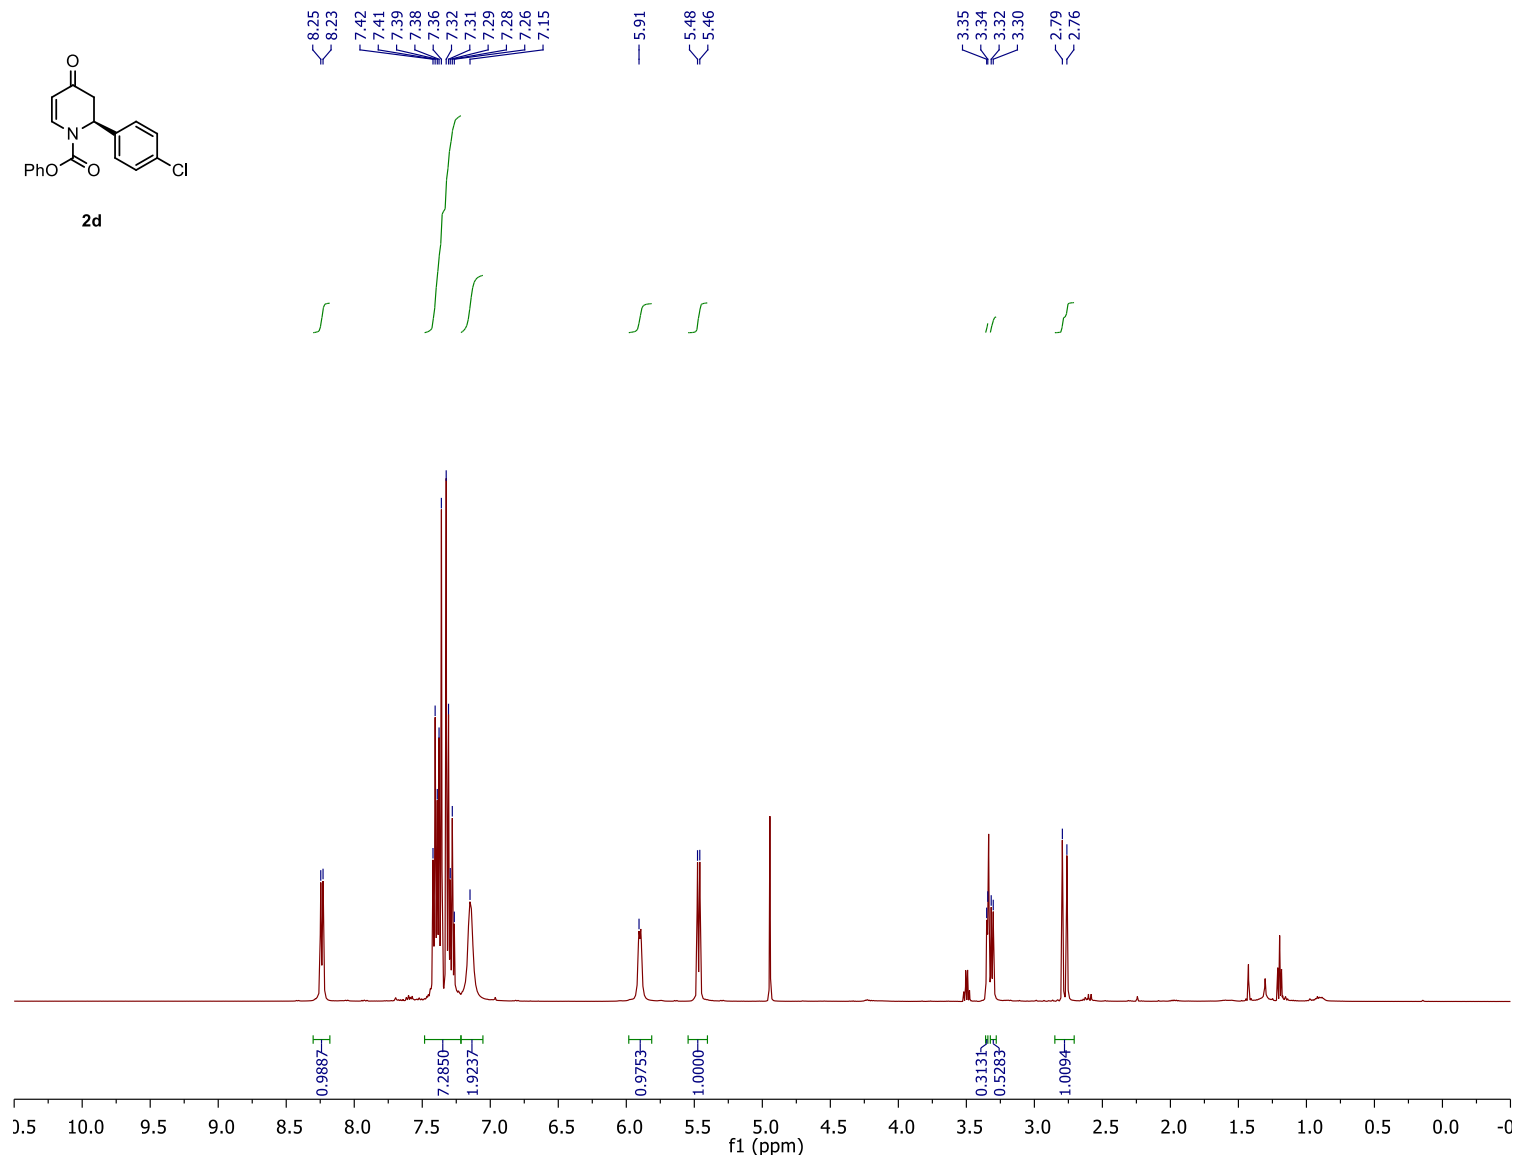

500 MHz  $^1\text{H}$ -NMR spectrum of **2d** in MeOD

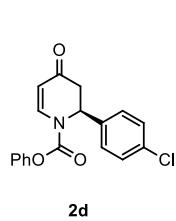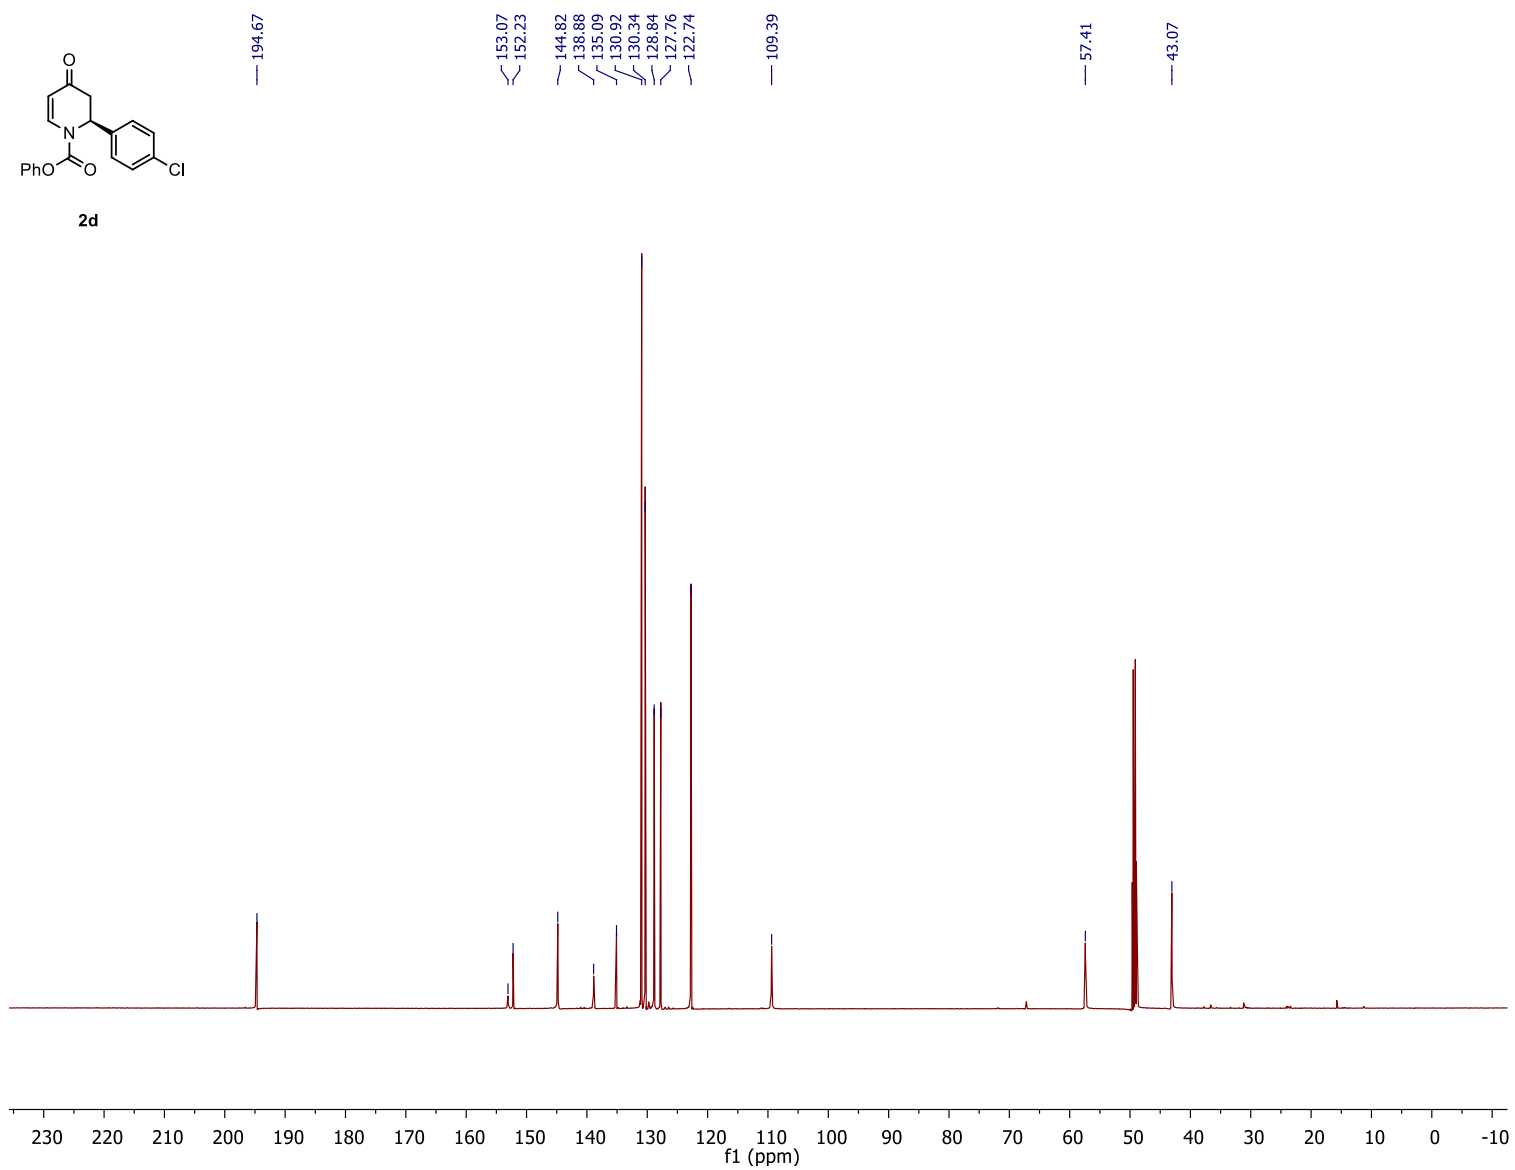

125 MHz  $^{13}\text{C}$ -NMR spectrum of **2d** in MeOD

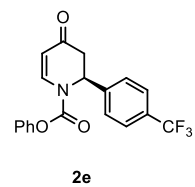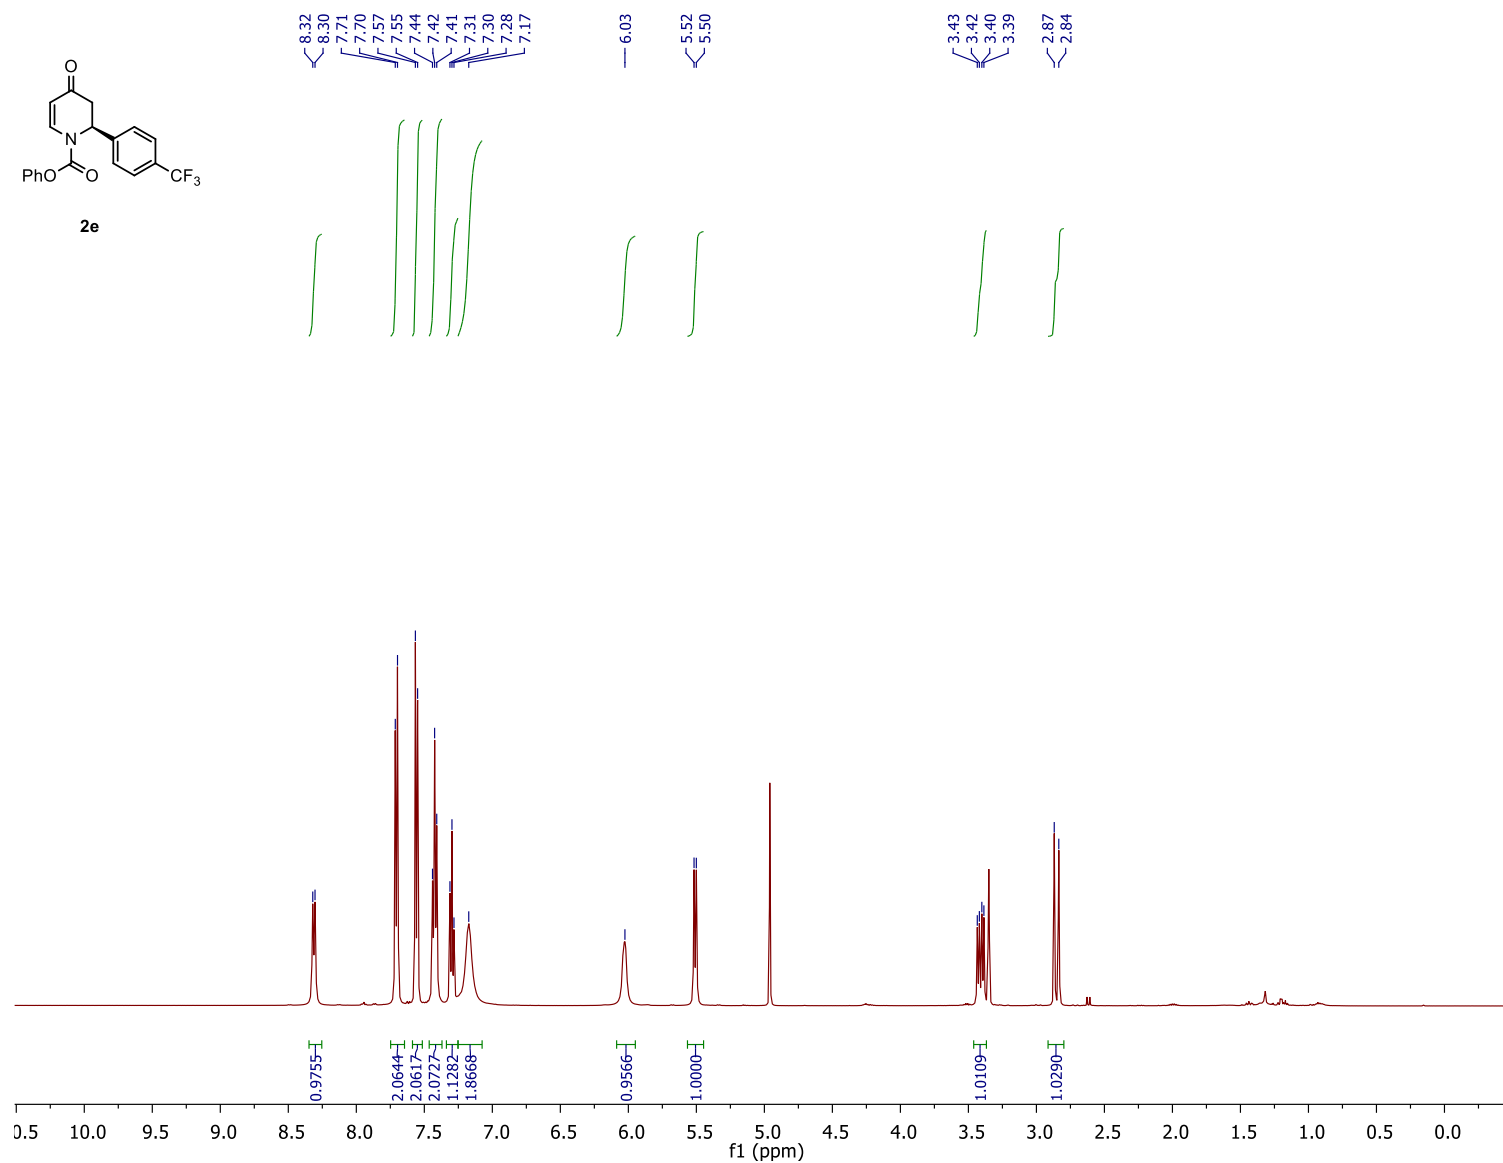

500 MHz <sup>1</sup>H-NMR spectrum of **2e** in MeOD

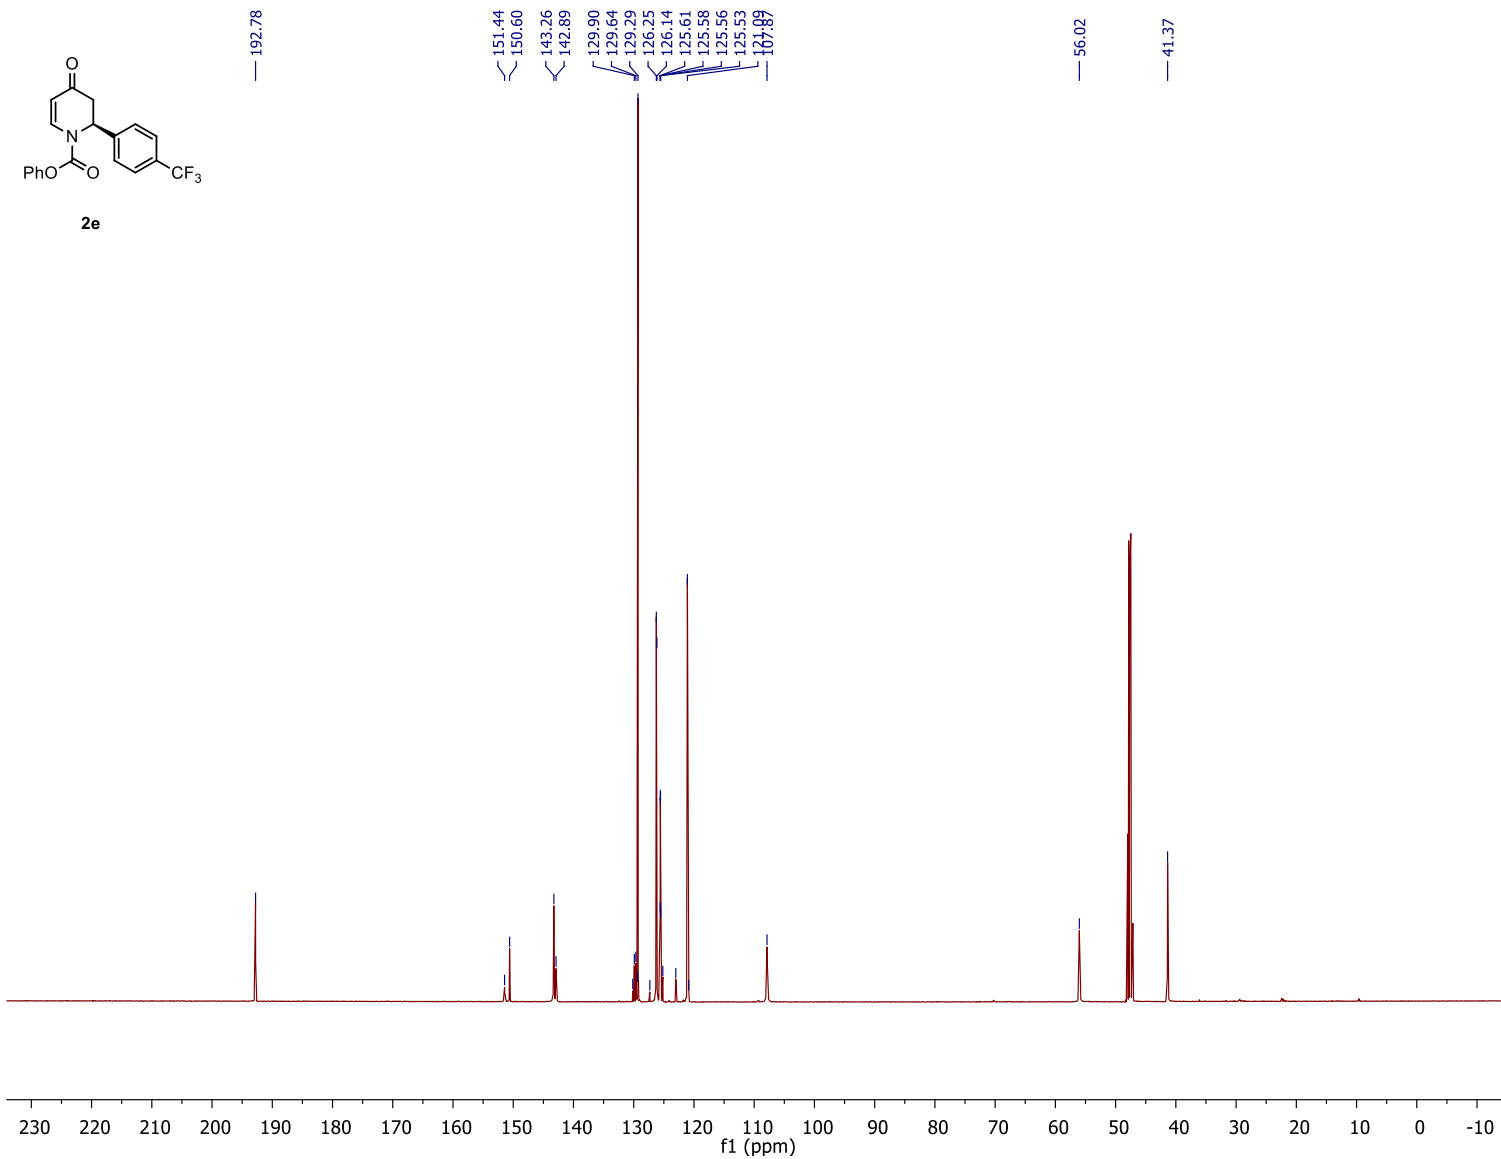

125 MHz <sup>13</sup>C-NMR spectrum of **2e** in MeOD



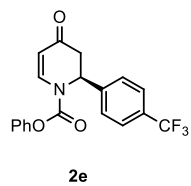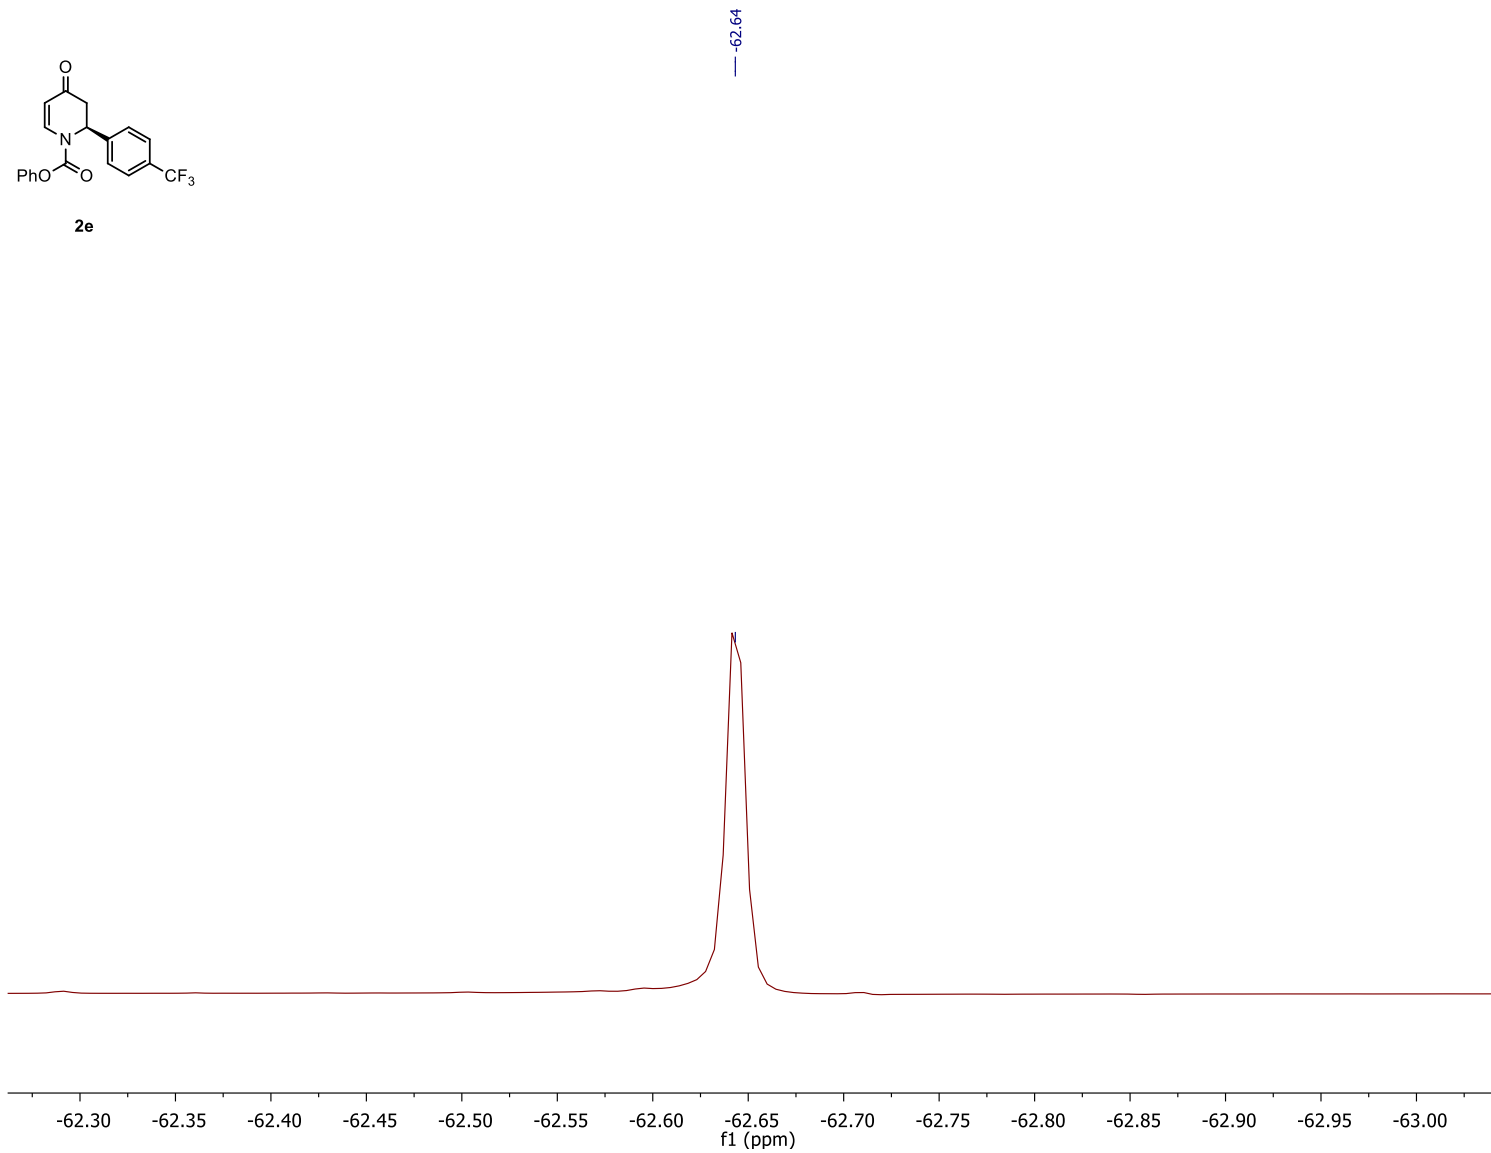

282 MHz  $^{19}\text{F}$  NMR spectrum of **2e** in MeOD

S-60

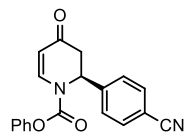

**2f**

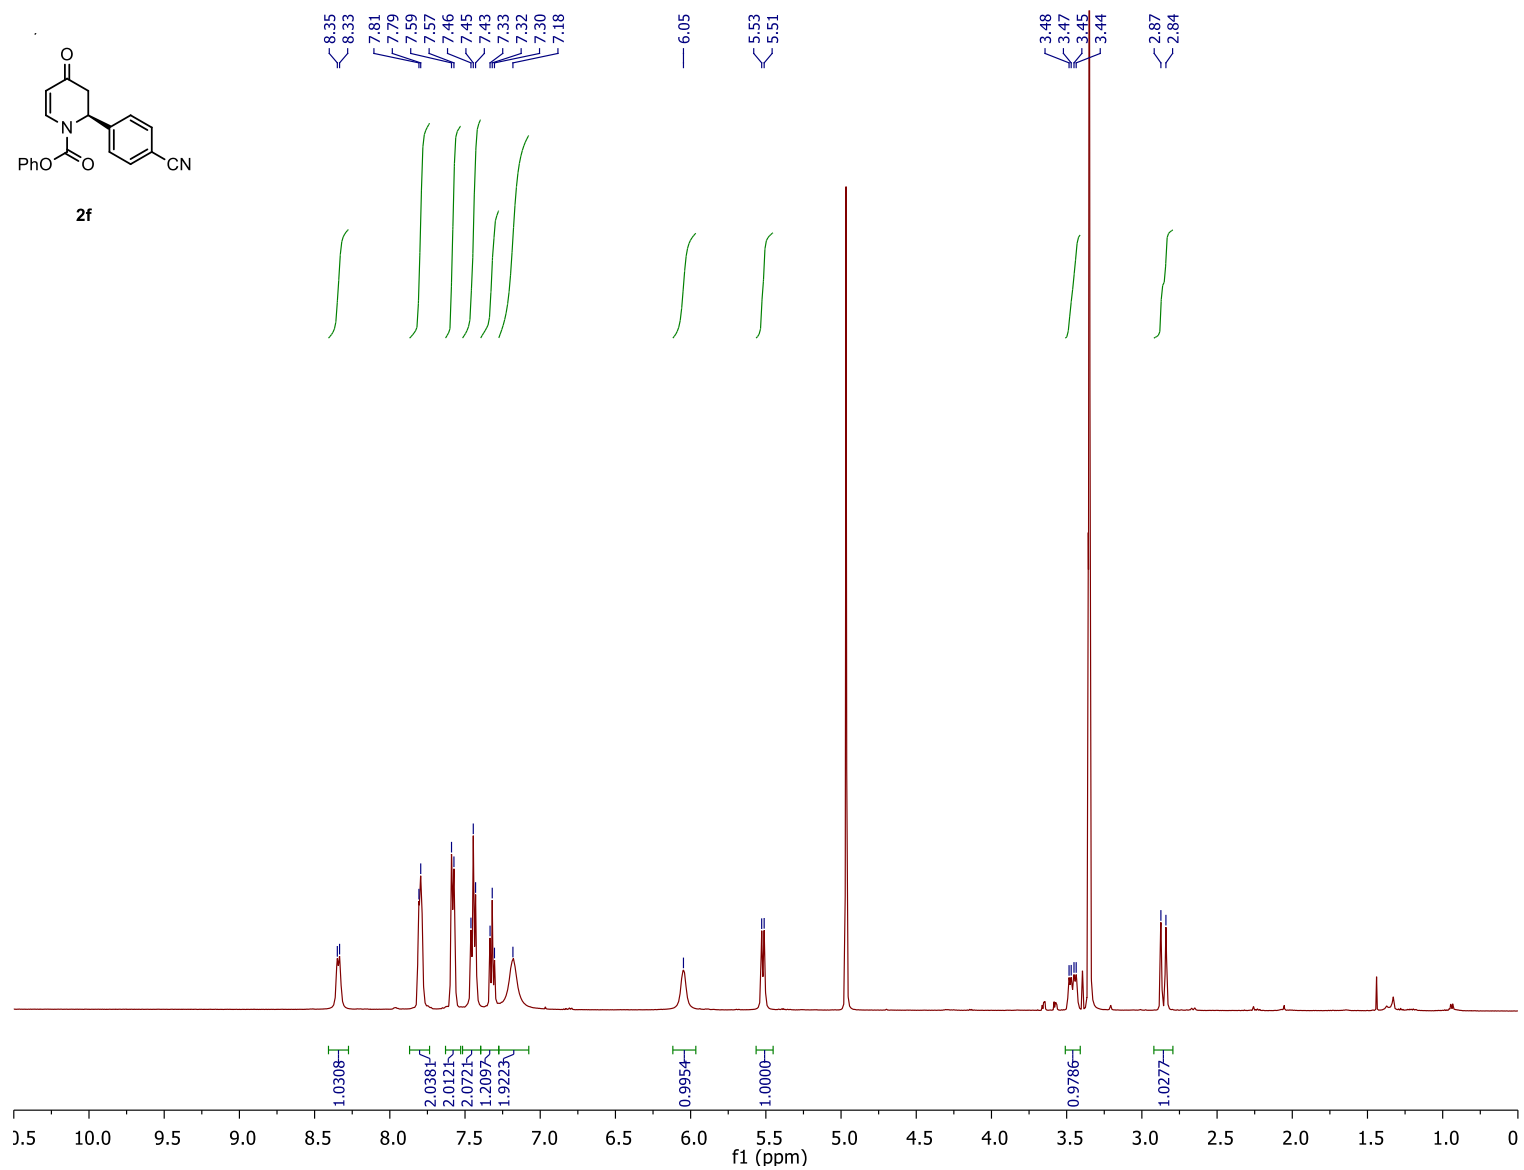

500 MHz <sup>1</sup>H-NMR spectrum of **2f** in MeOD

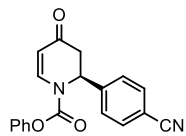

**2f**

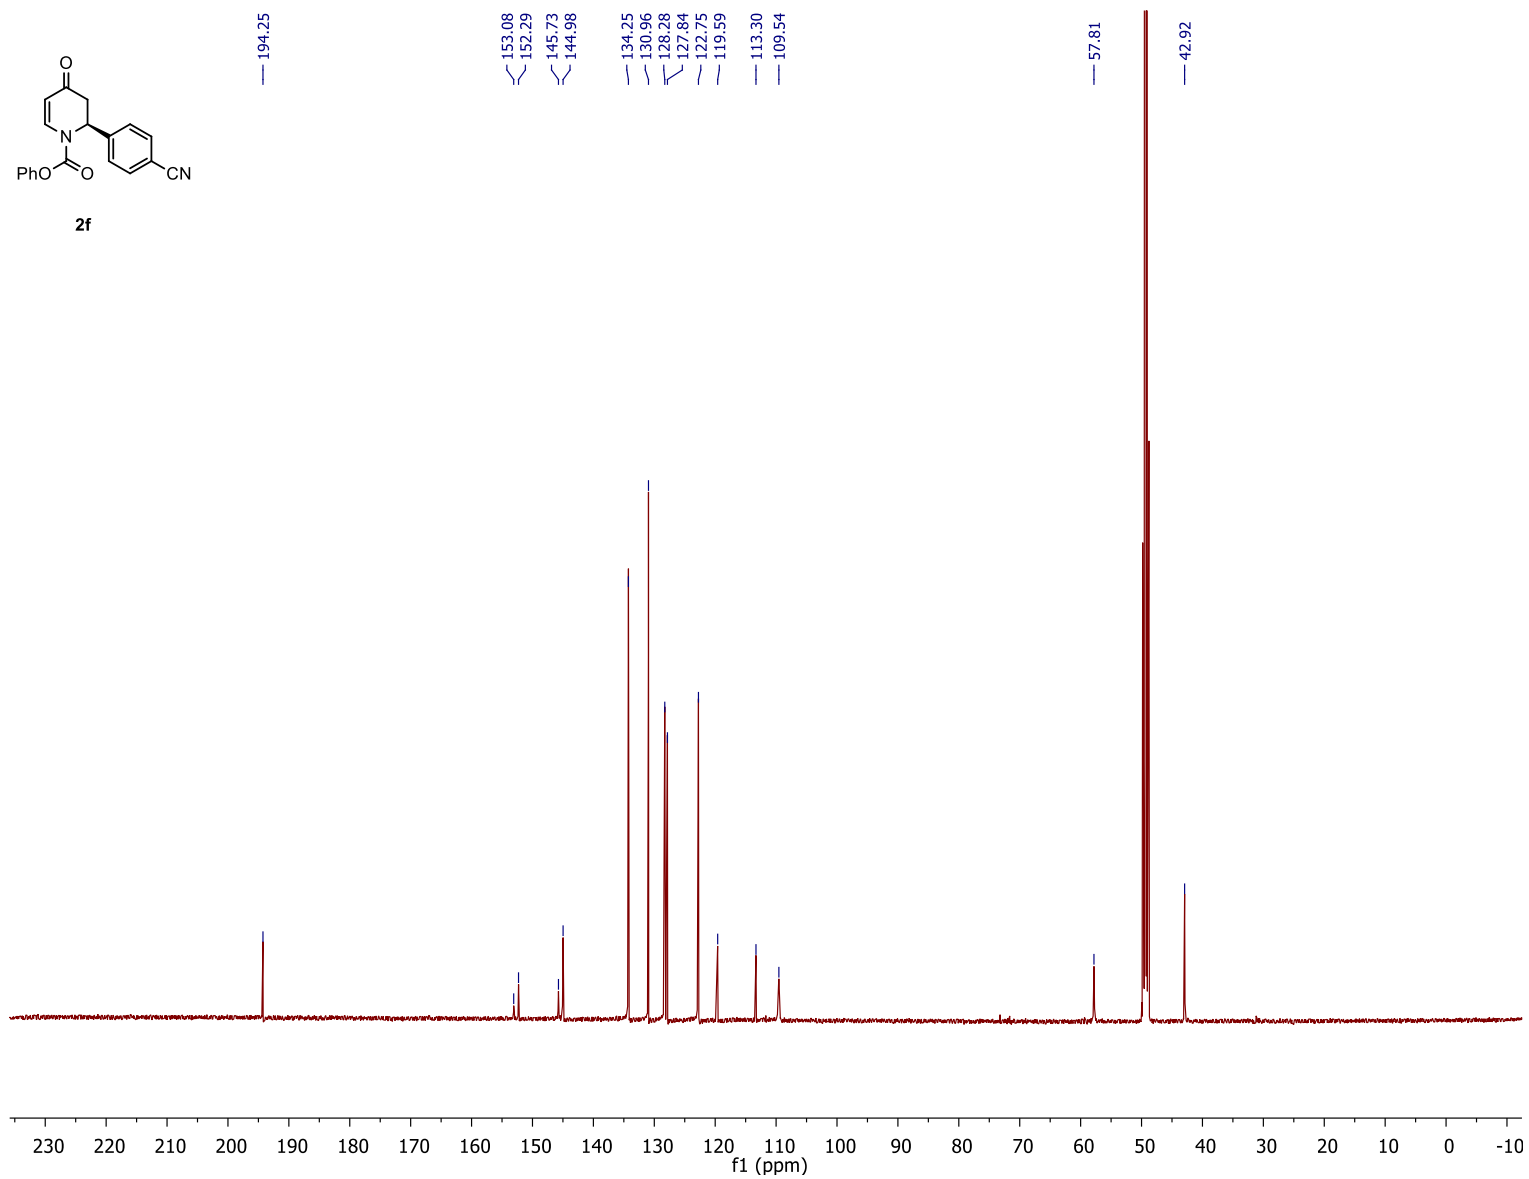

125 MHz  $^{13}\text{C}$ -NMR spectrum of **2f** in MeOD

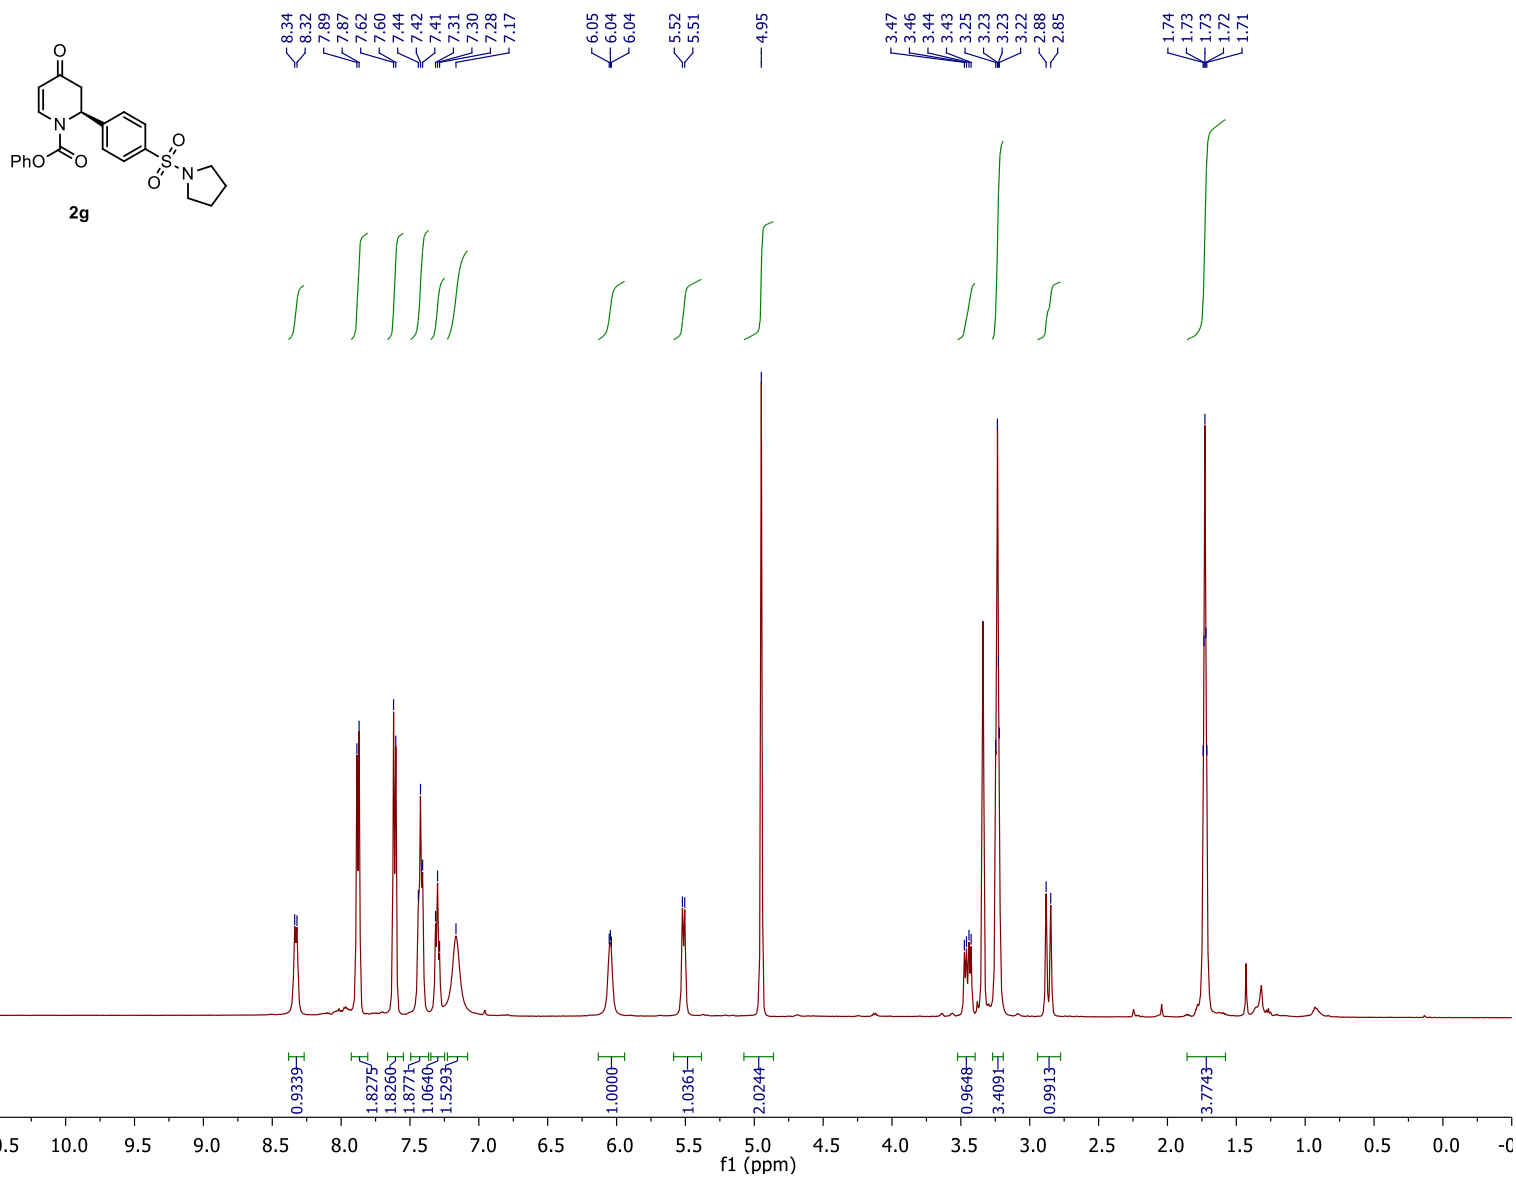

500 MHz <sup>1</sup>H-NMR spectrum of **2g** in MeOD

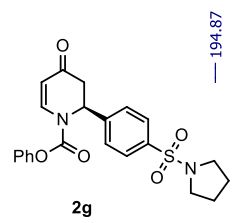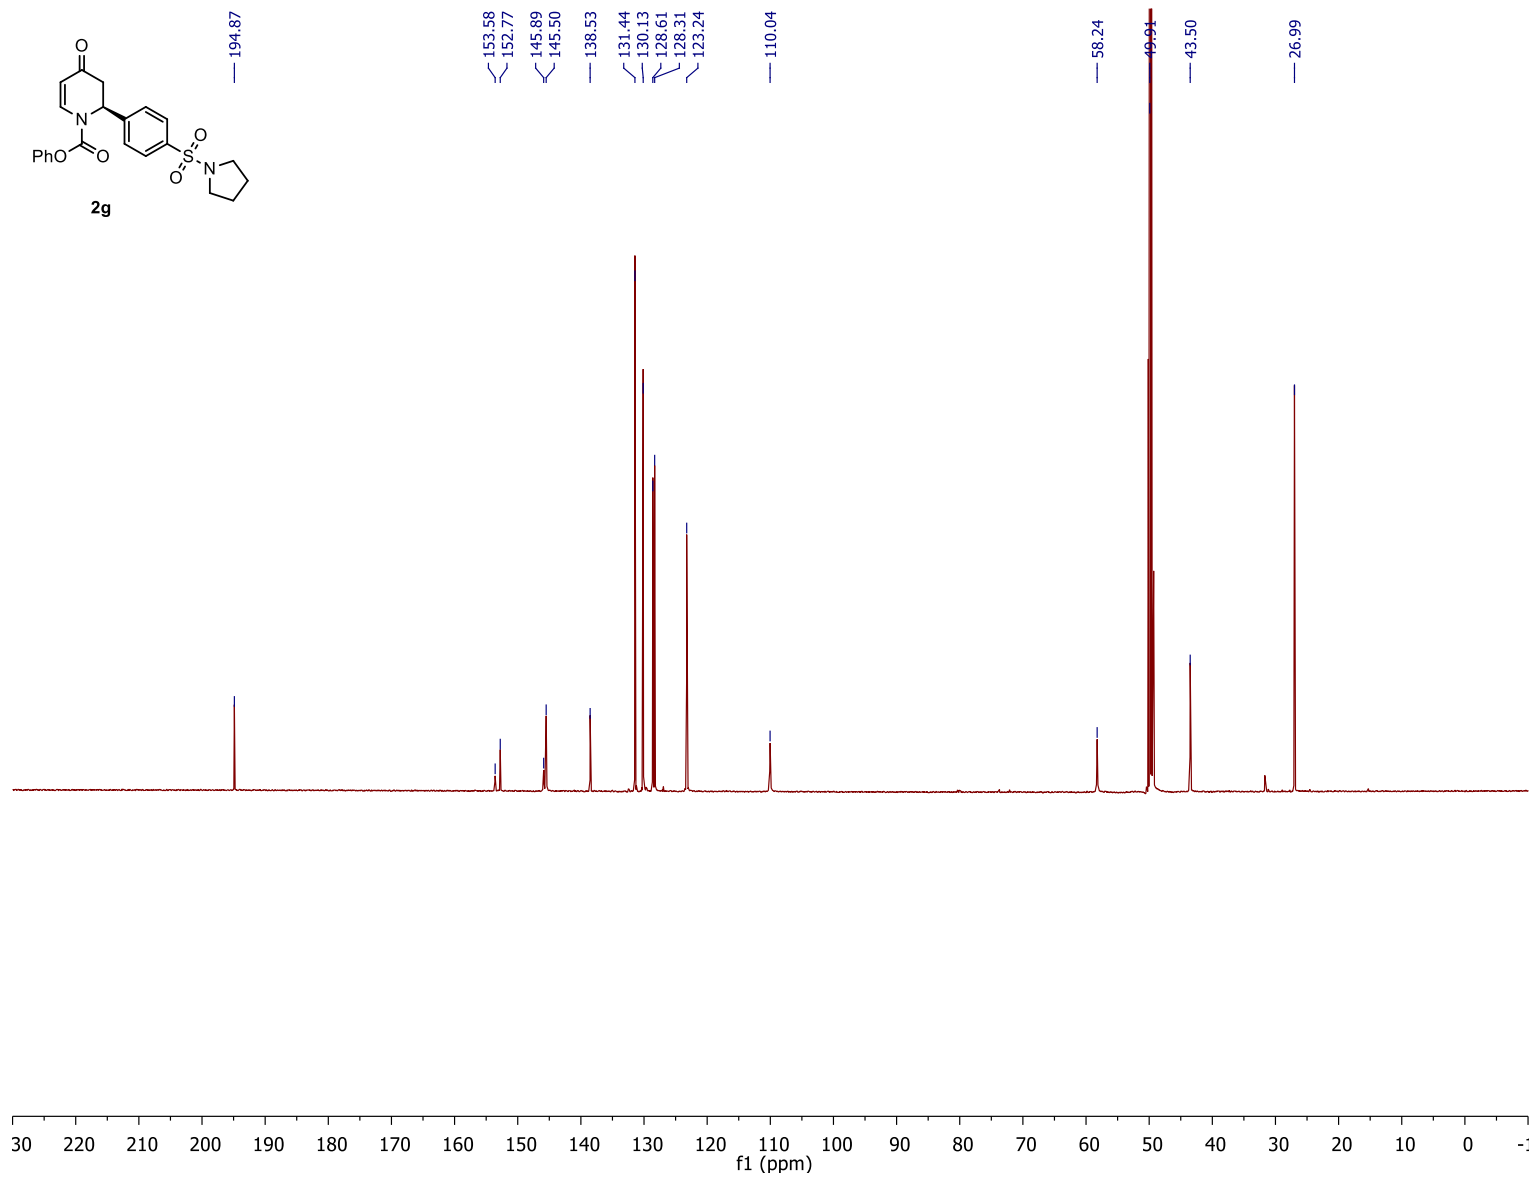

125 MHz  $^{13}\text{C}$ -NMR spectrum of **2g** in MeOD

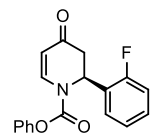

**2h**

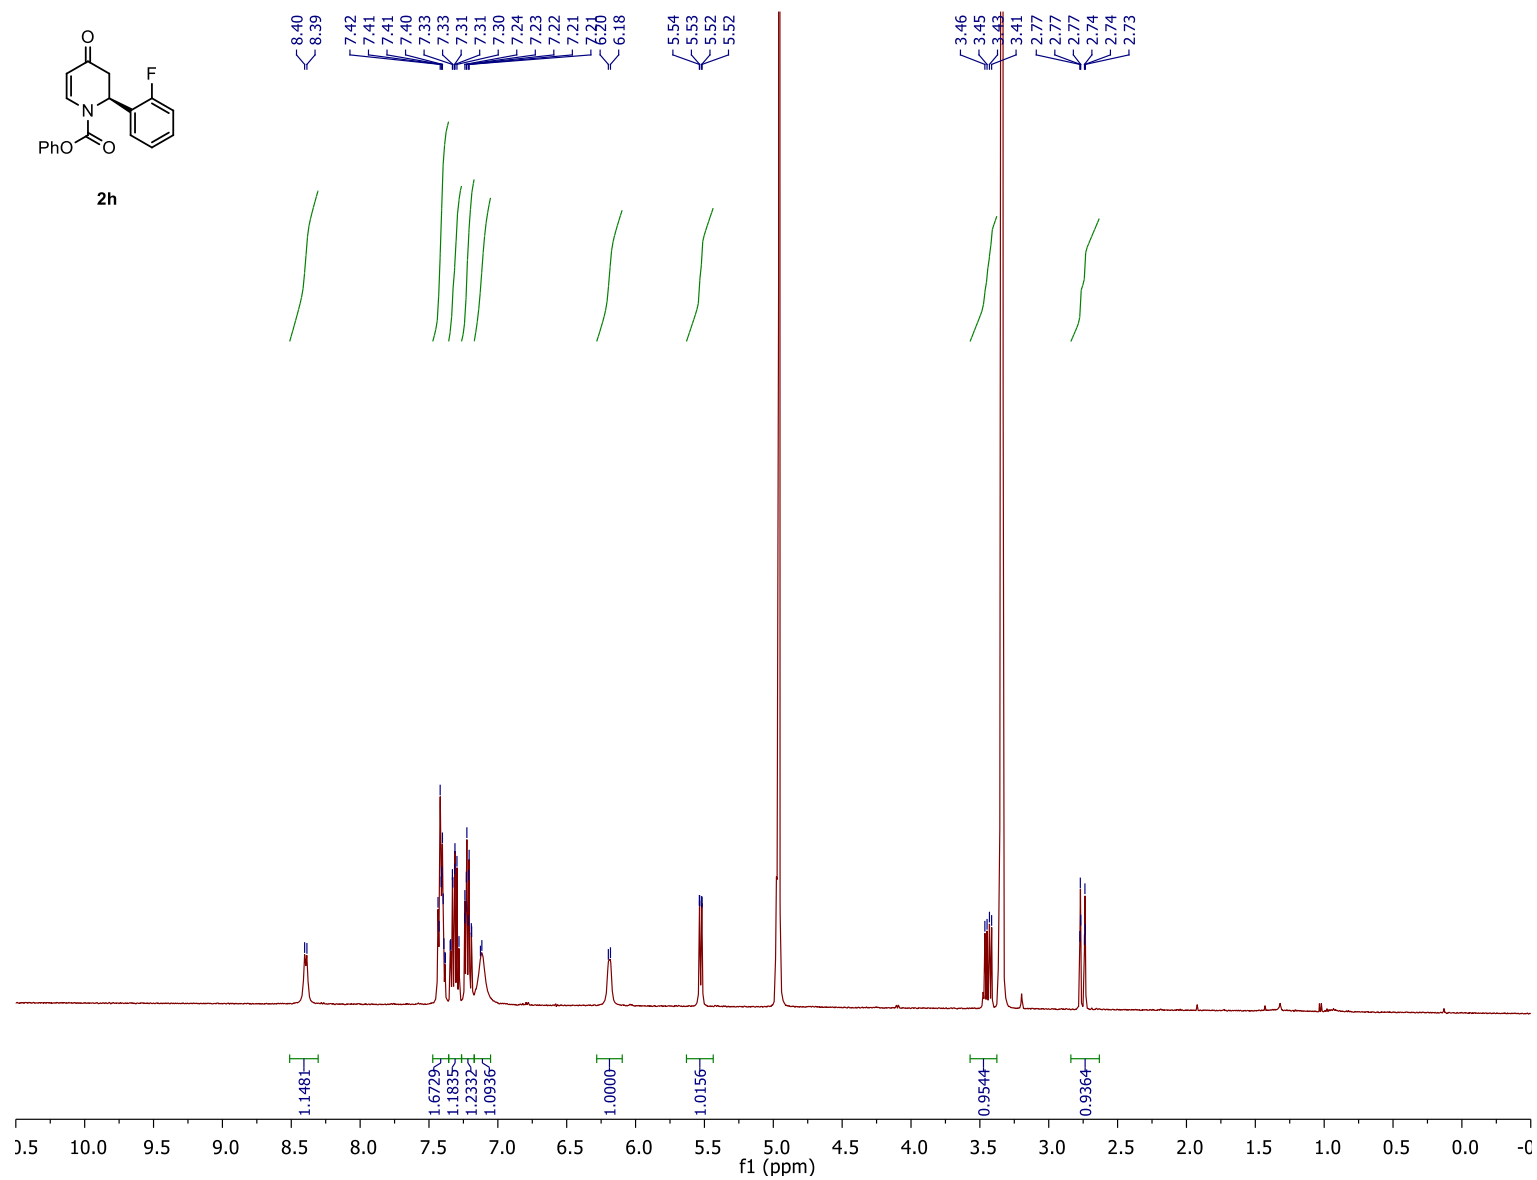

500 MHz  $^1\text{H}$ -NMR spectrum of **2h** in MeOD

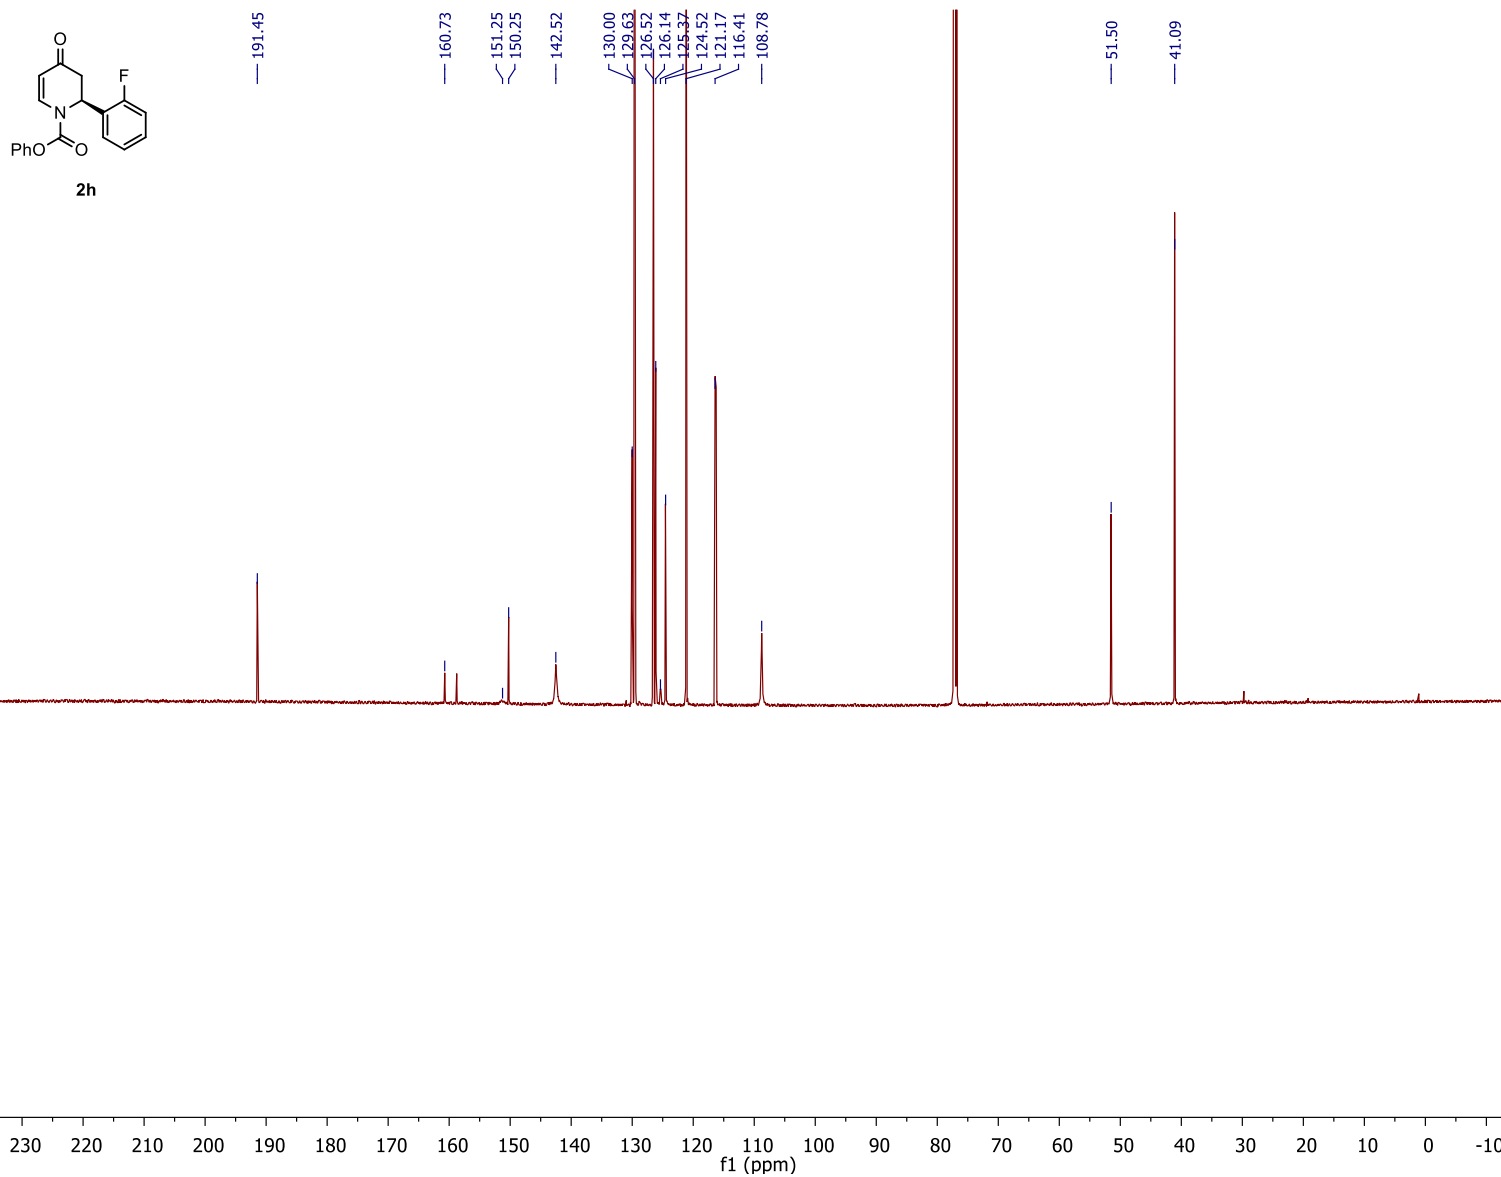

125 MHz <sup>13</sup>C-NMR spectrum of **2h** in CDCl<sub>3</sub>

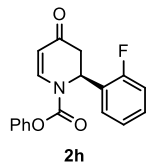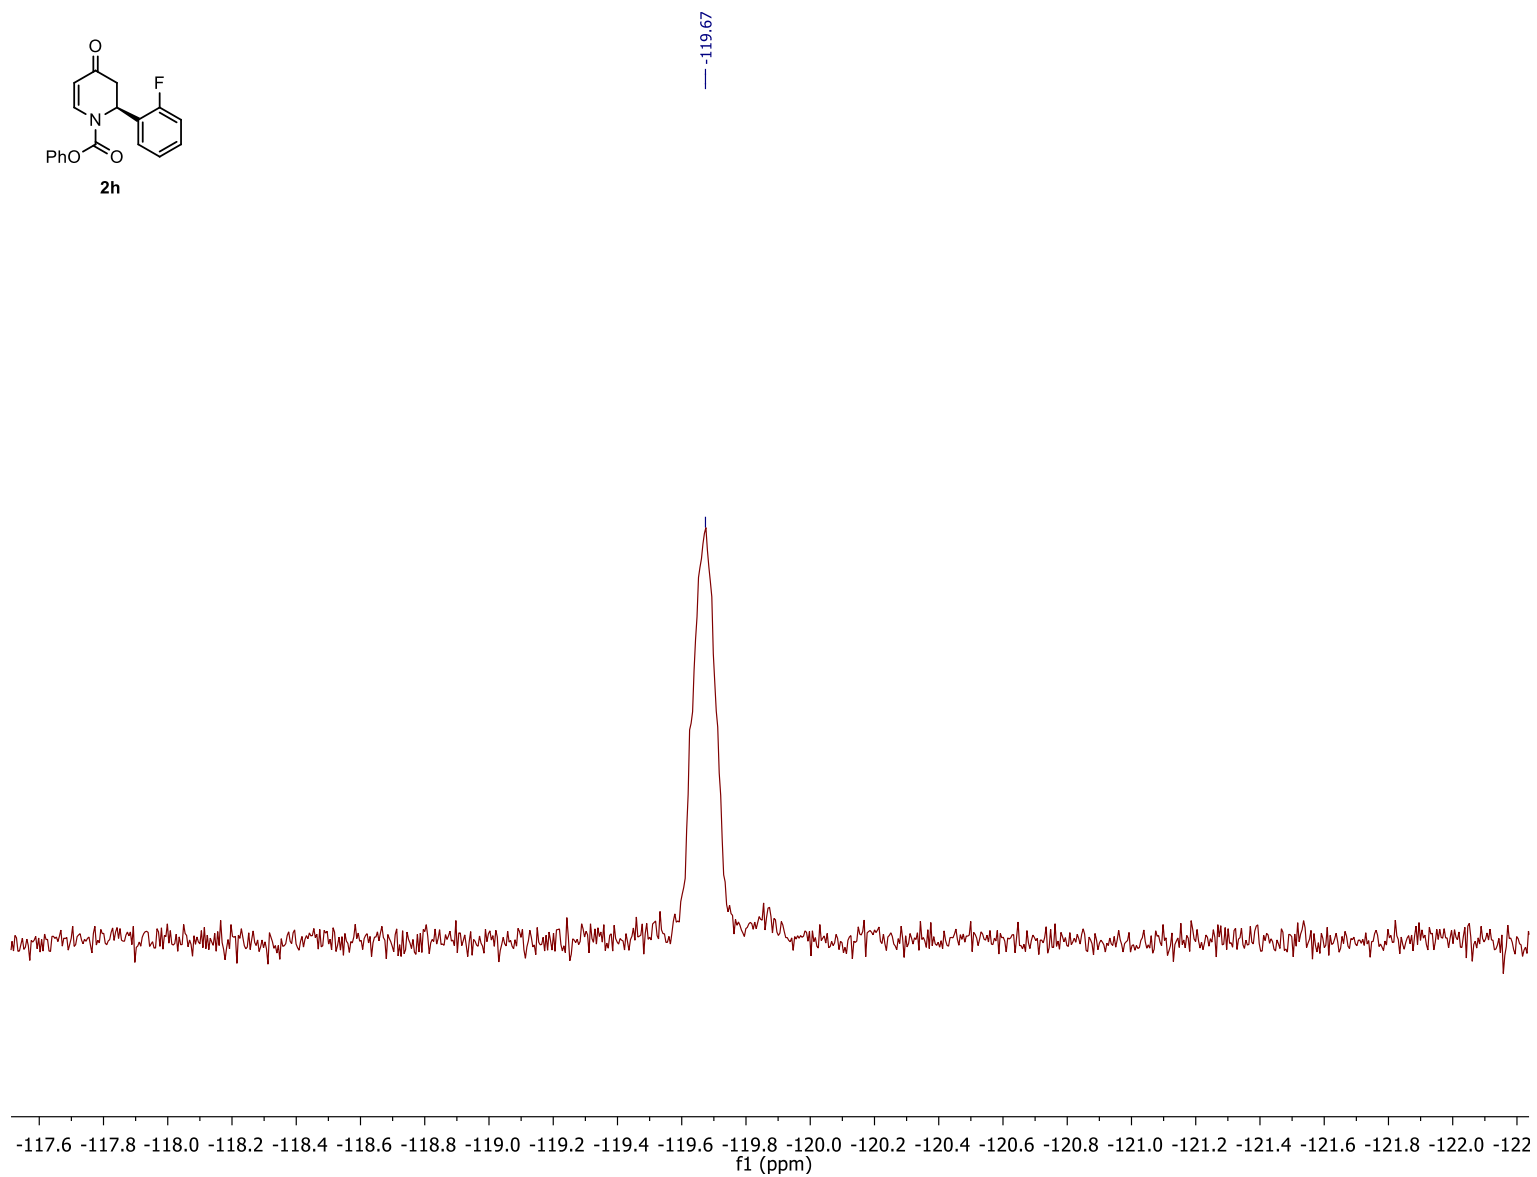

282 MHz  $^{19}\text{F}$  NMR spectrum of **2h** in MeOD



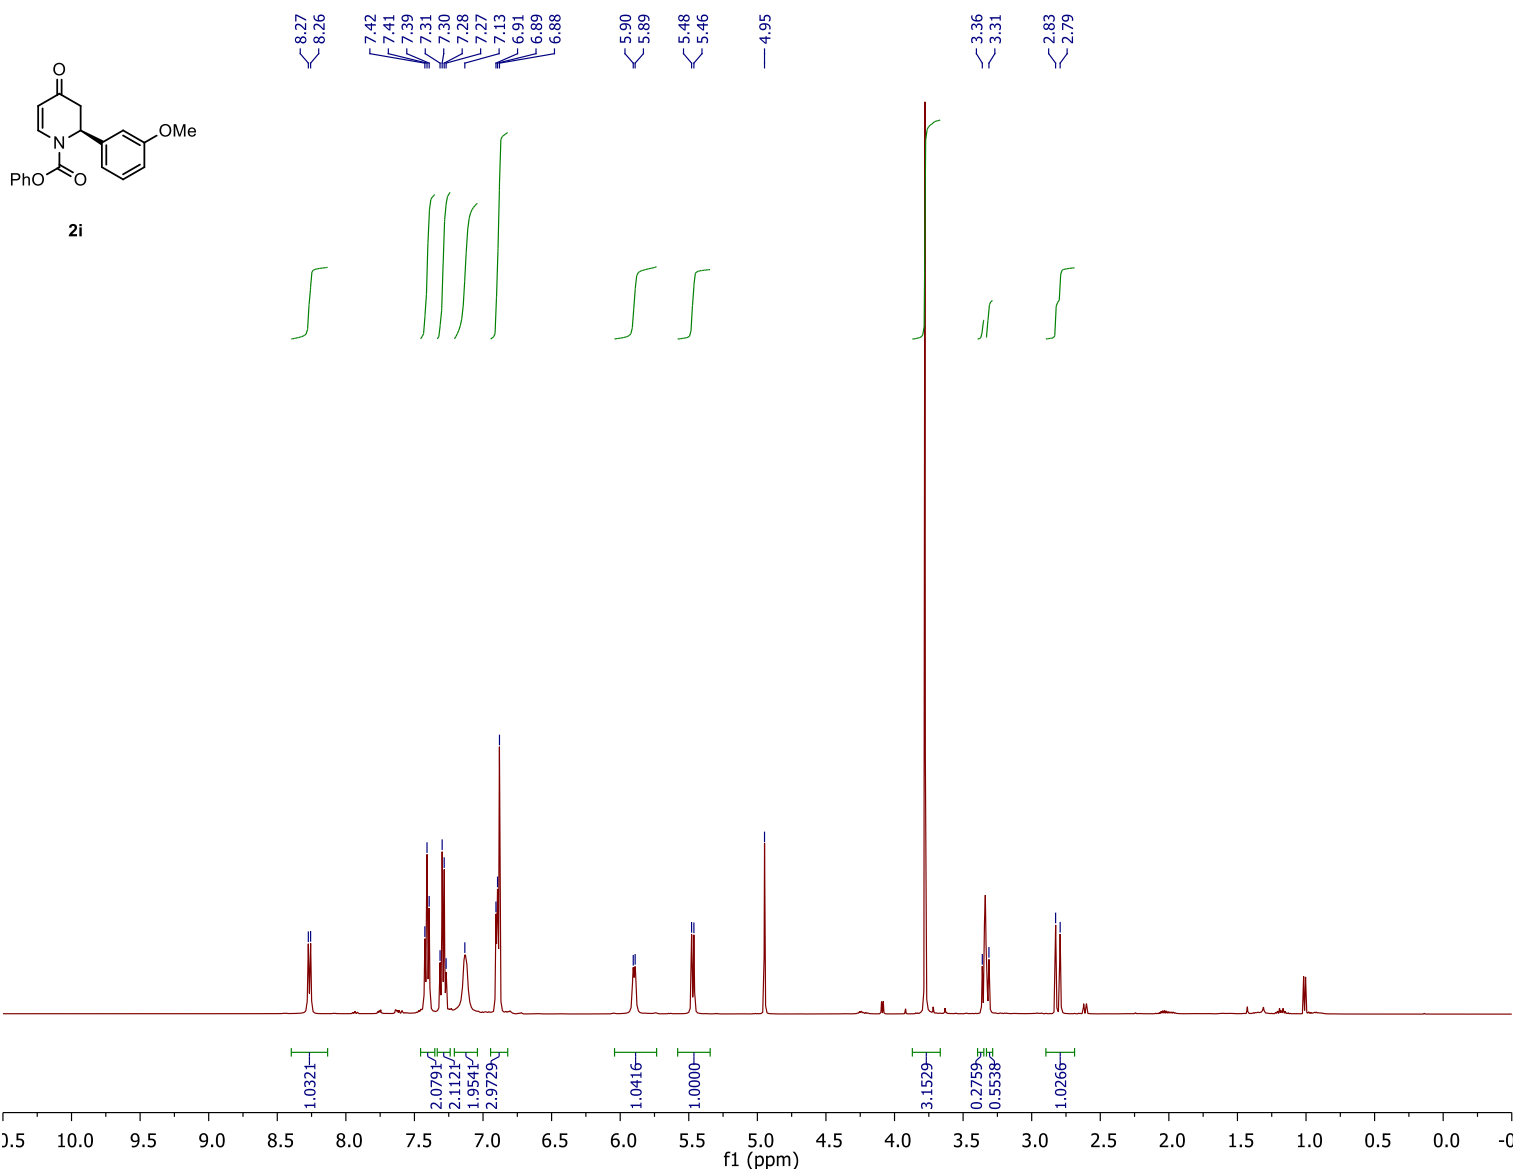

500 MHz  $^1\text{H}$ -NMR spectrum of **2i** in MeOD

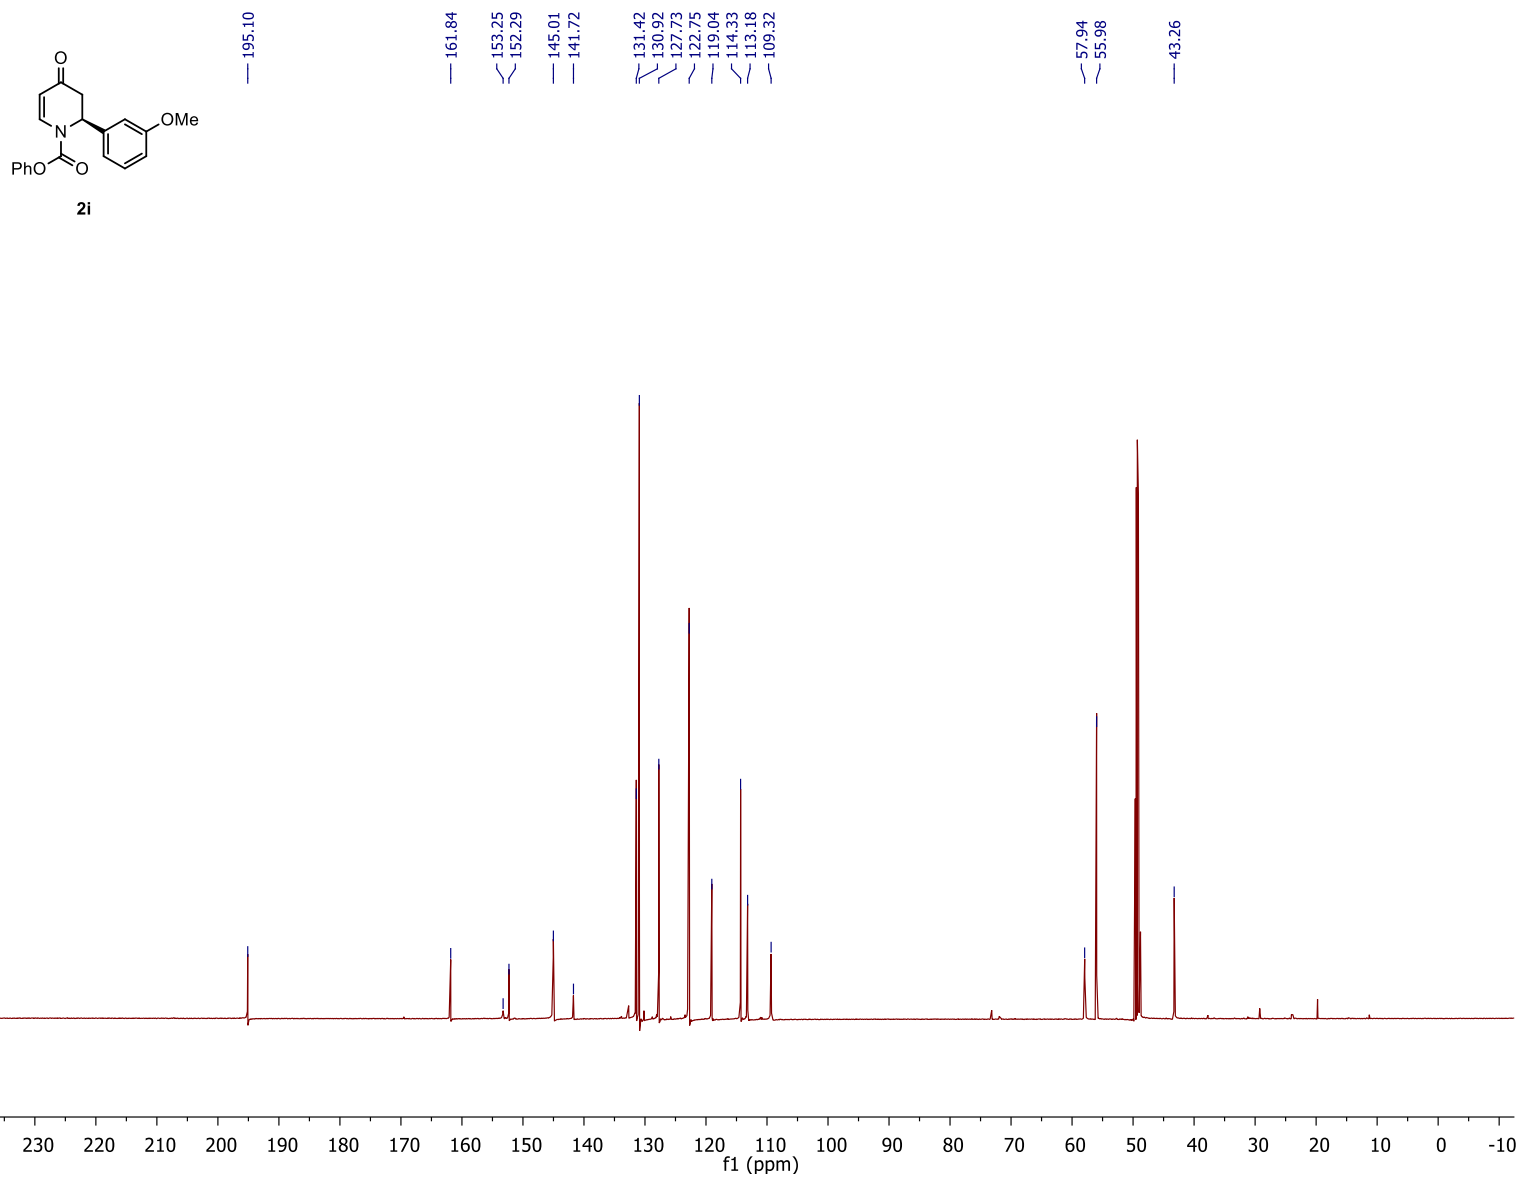

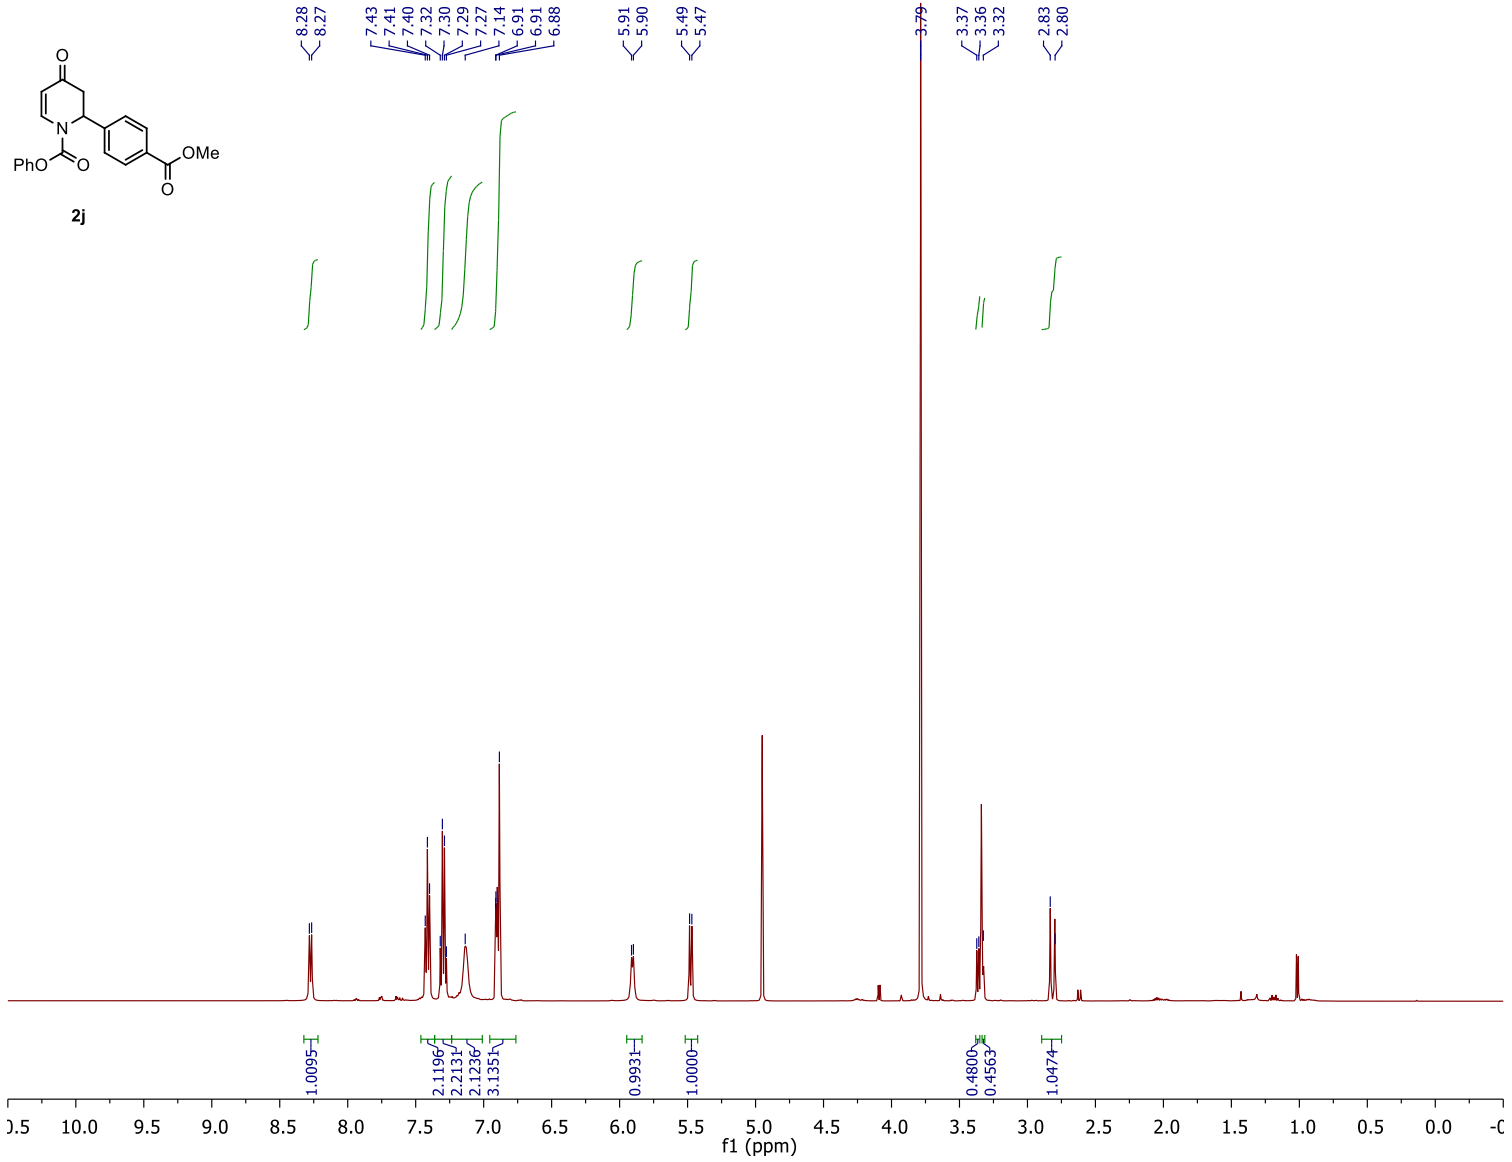

500 MHz <sup>1</sup>H-NMR spectrum of **2j** in MeOD

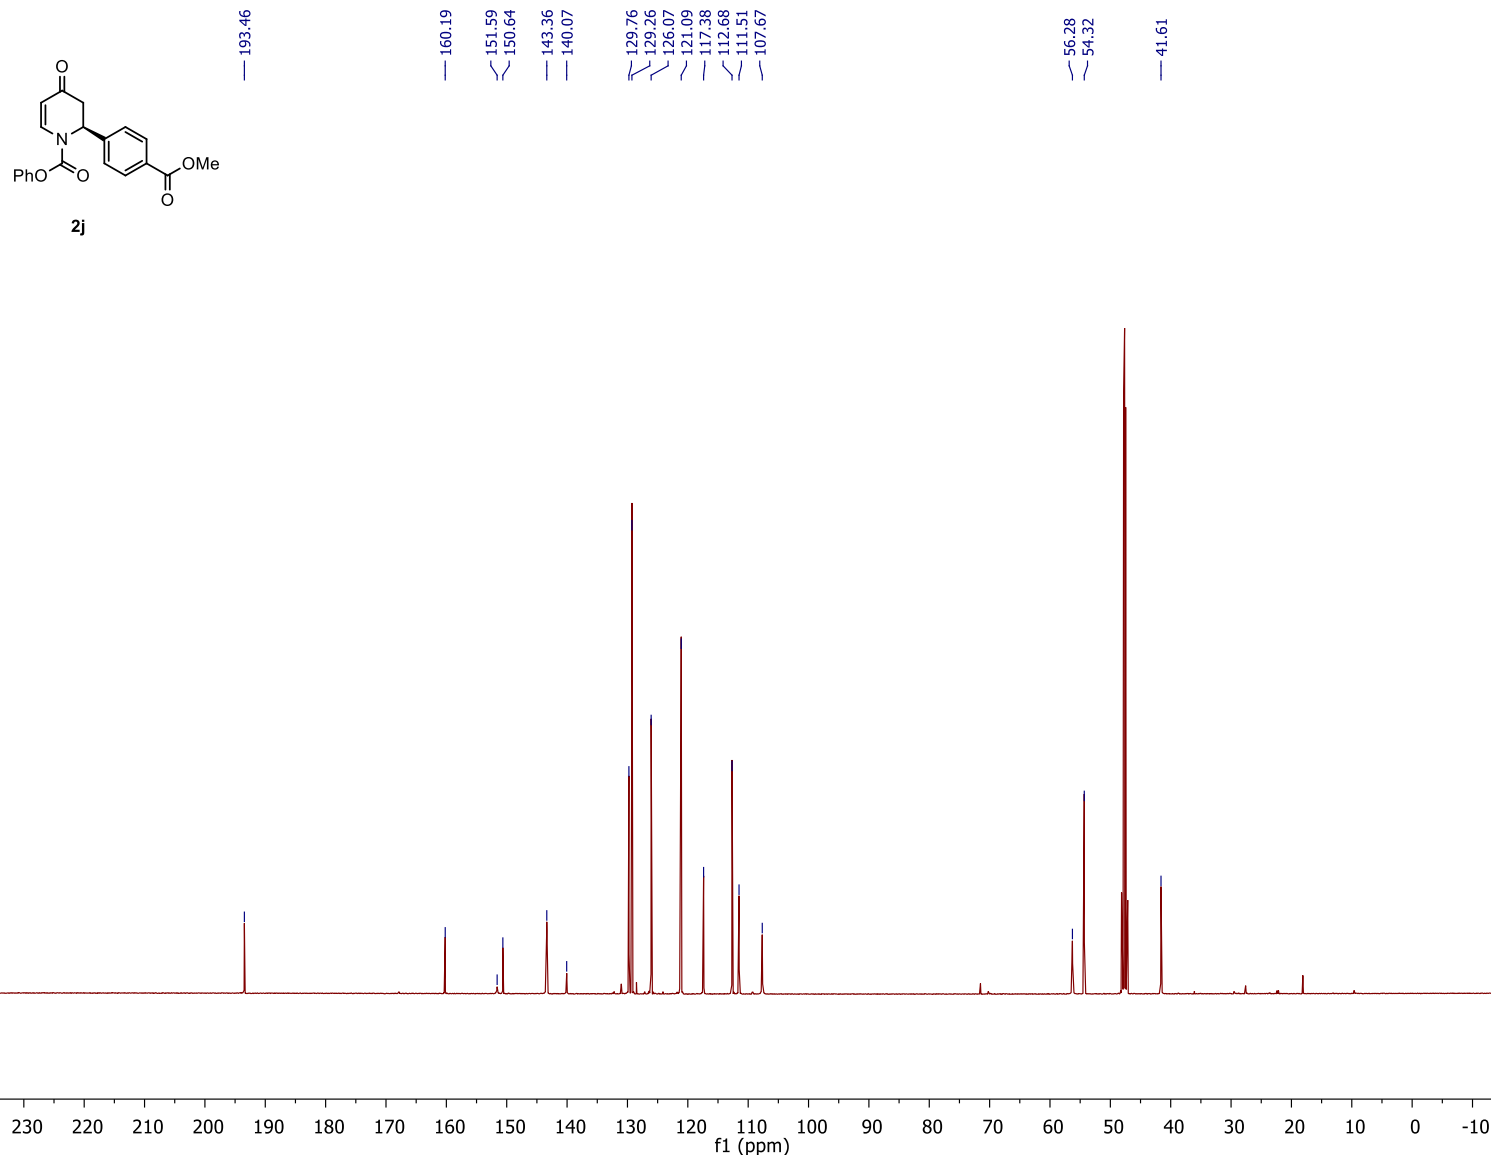

125 MHz  $^{13}\text{C}$ -NMR spectrum of **2j** in MeOD

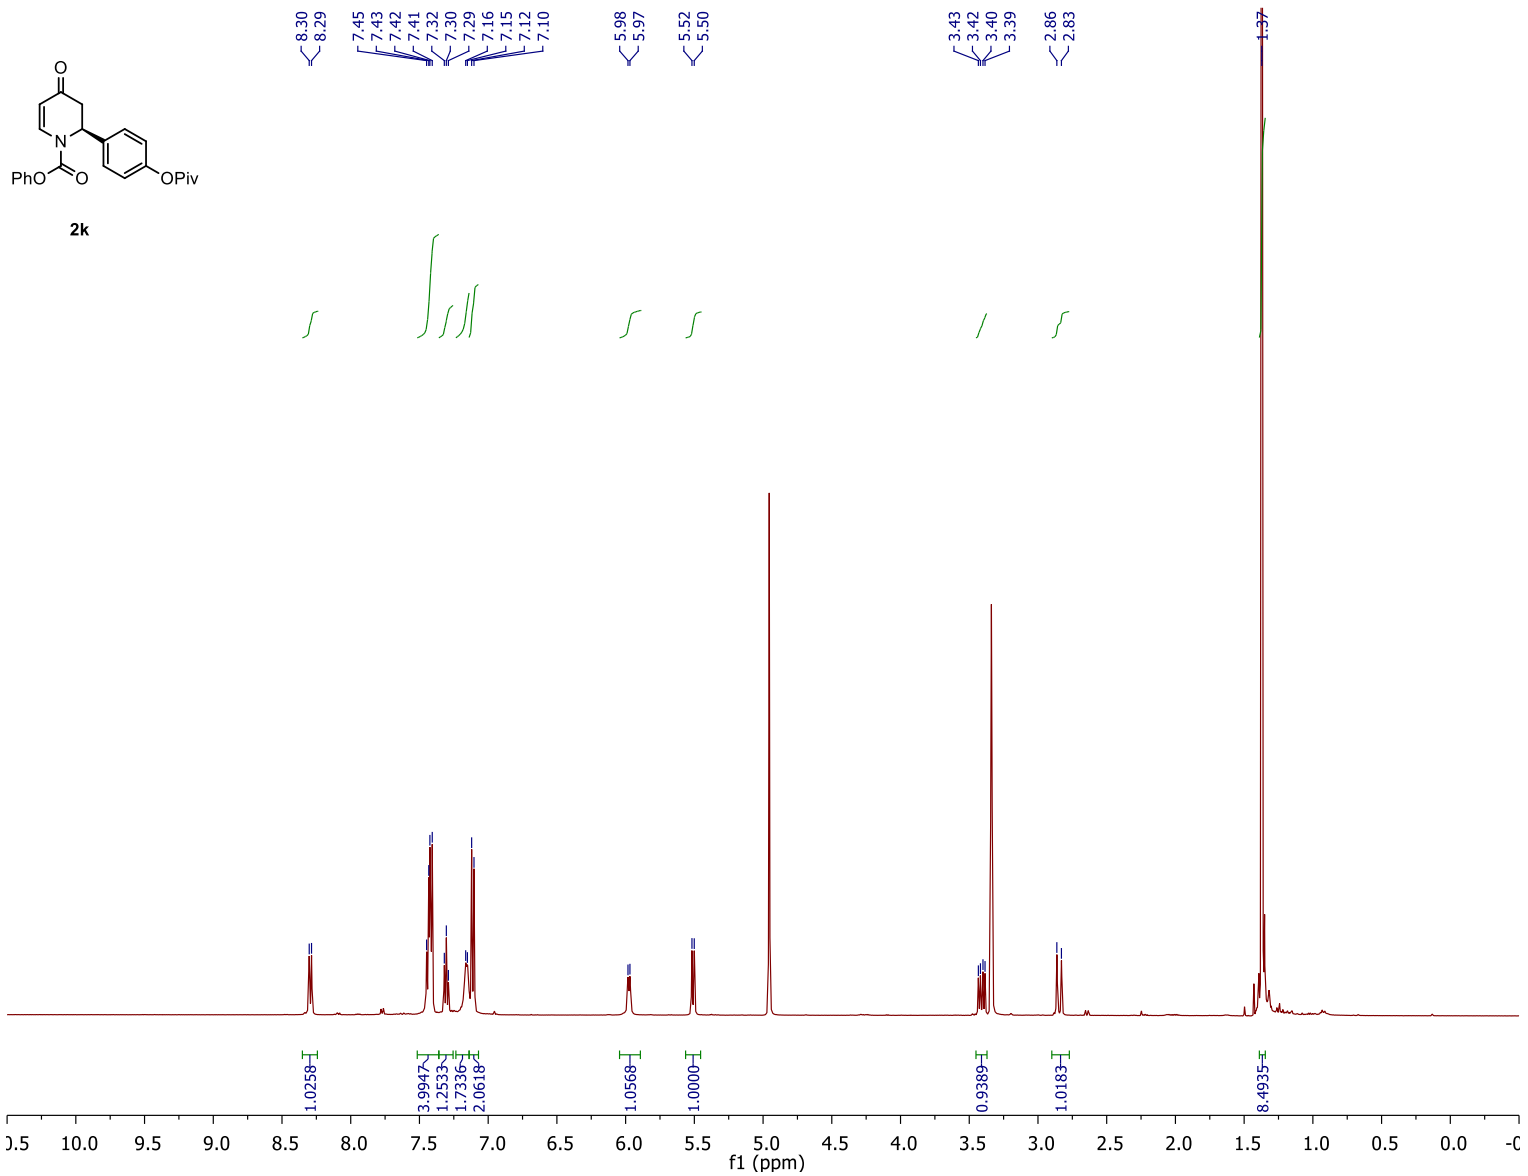

500 MHz  $^1\text{H-NMR}$  spectrum of **2k** in MeOD

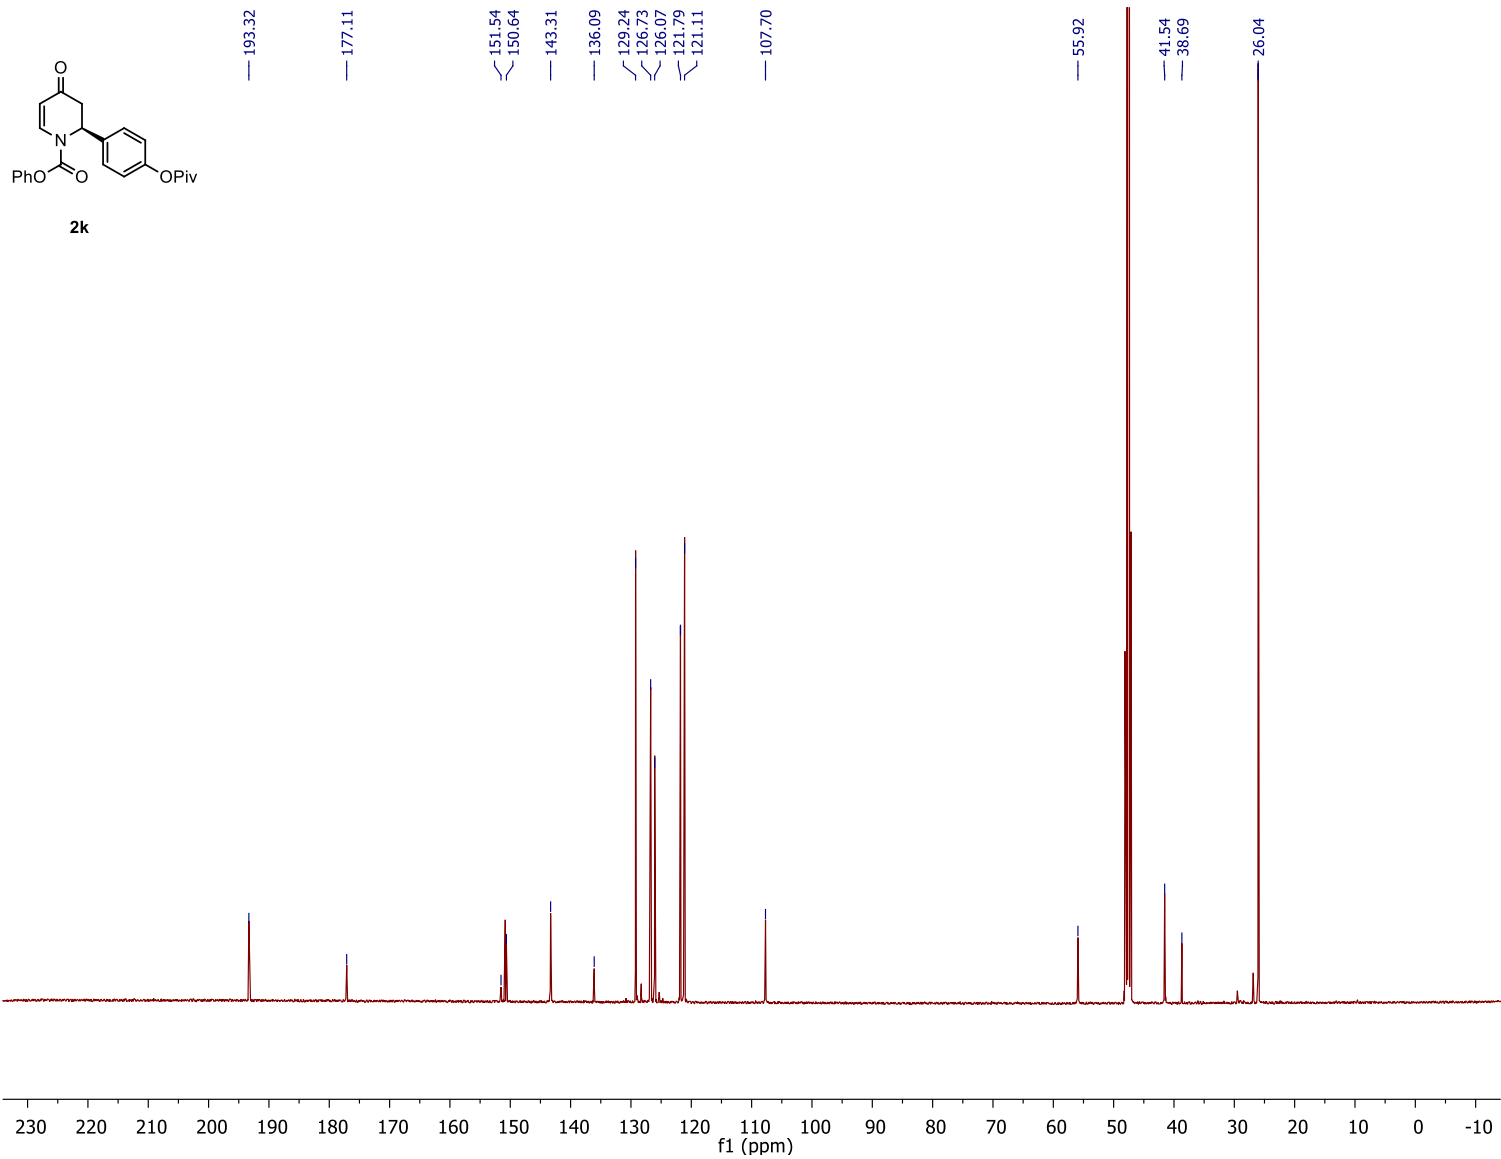

125 MHz  $^{13}\text{C}$ -NMR spectrum of **2k** in MeOD

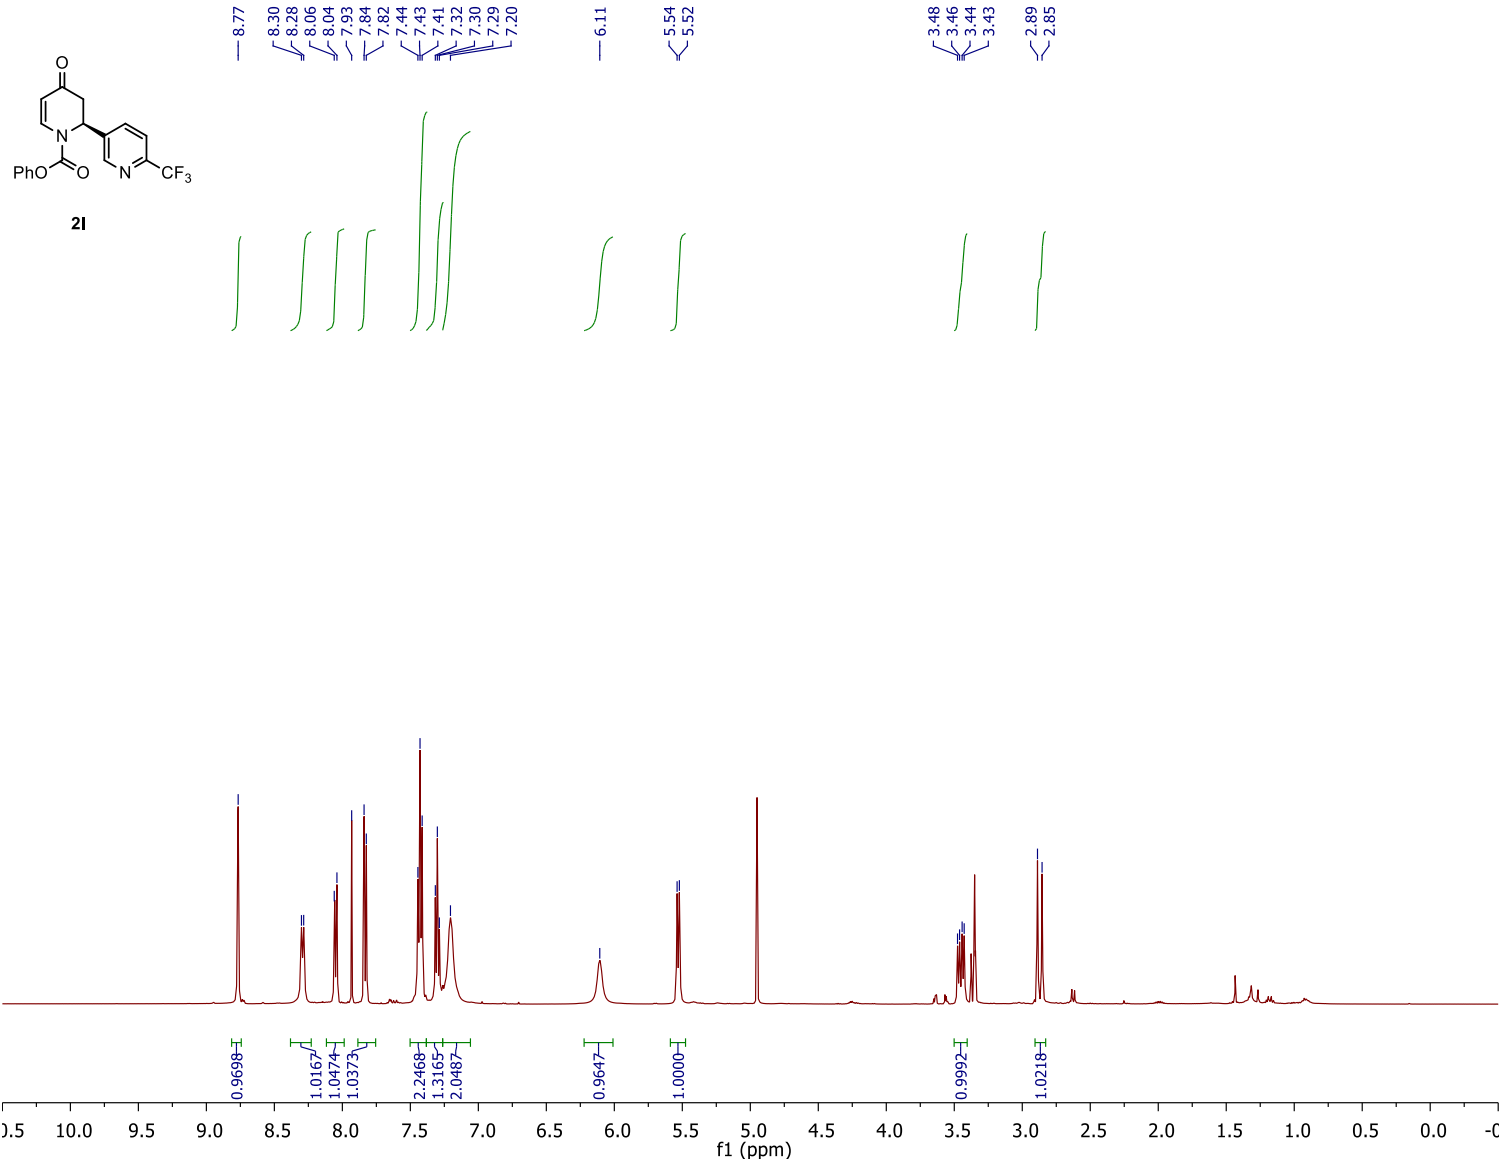

500 MHz  $^1\text{H}$ -NMR spectrum of **21** in MeOD

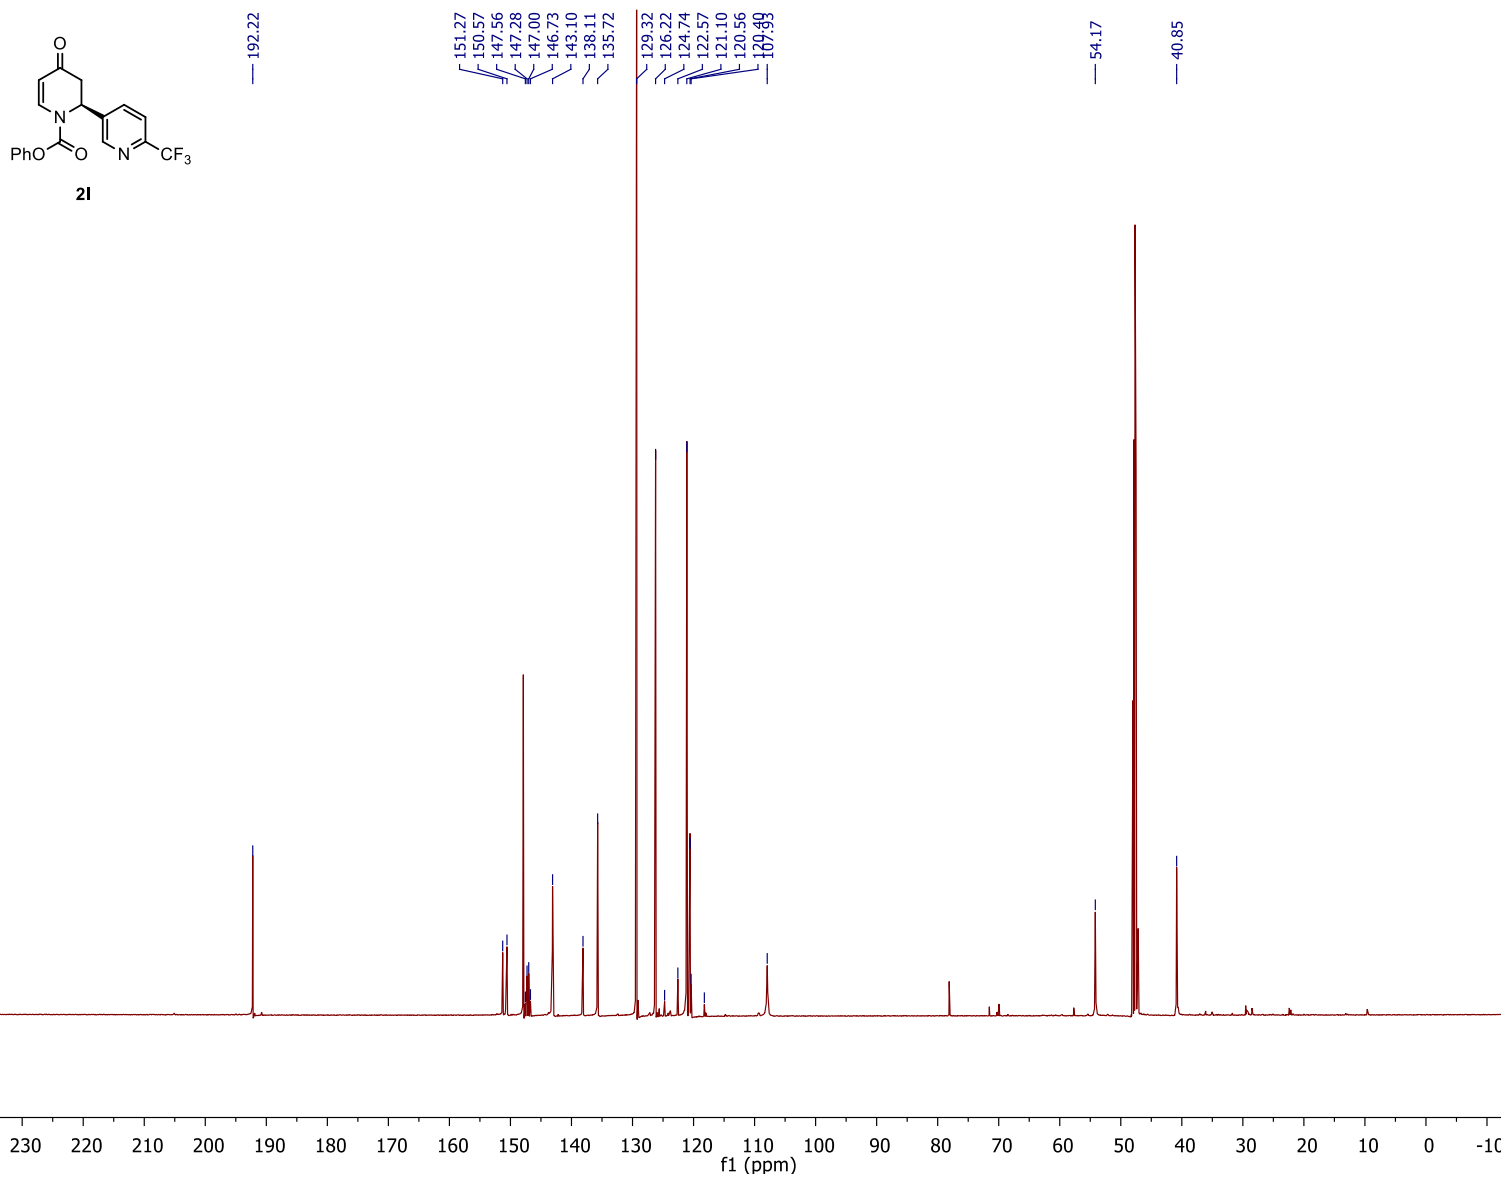

125 MHz <sup>13</sup>C-NMR spectrum of **2I** in MeOD



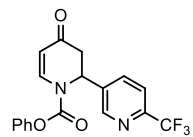

**21**

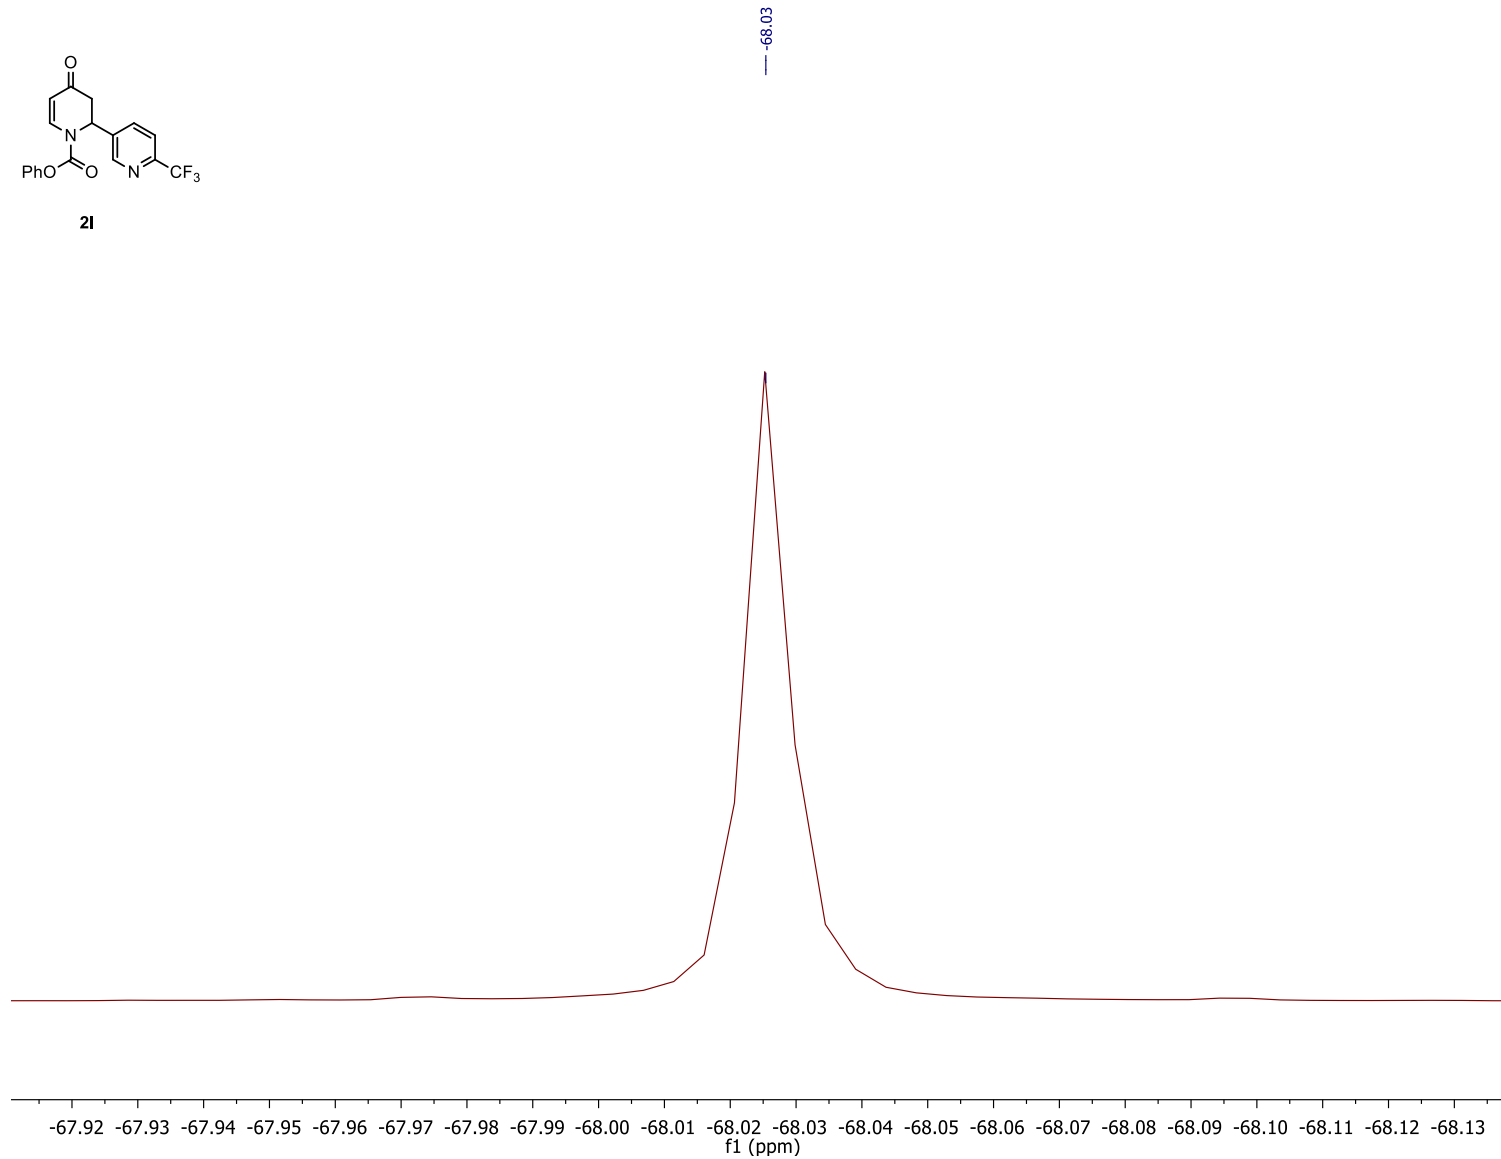

282 MHz  $^{19}\text{F}$  NMR spectrum of **21** in MeOD

S-76

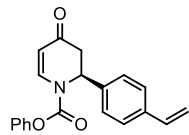

2m

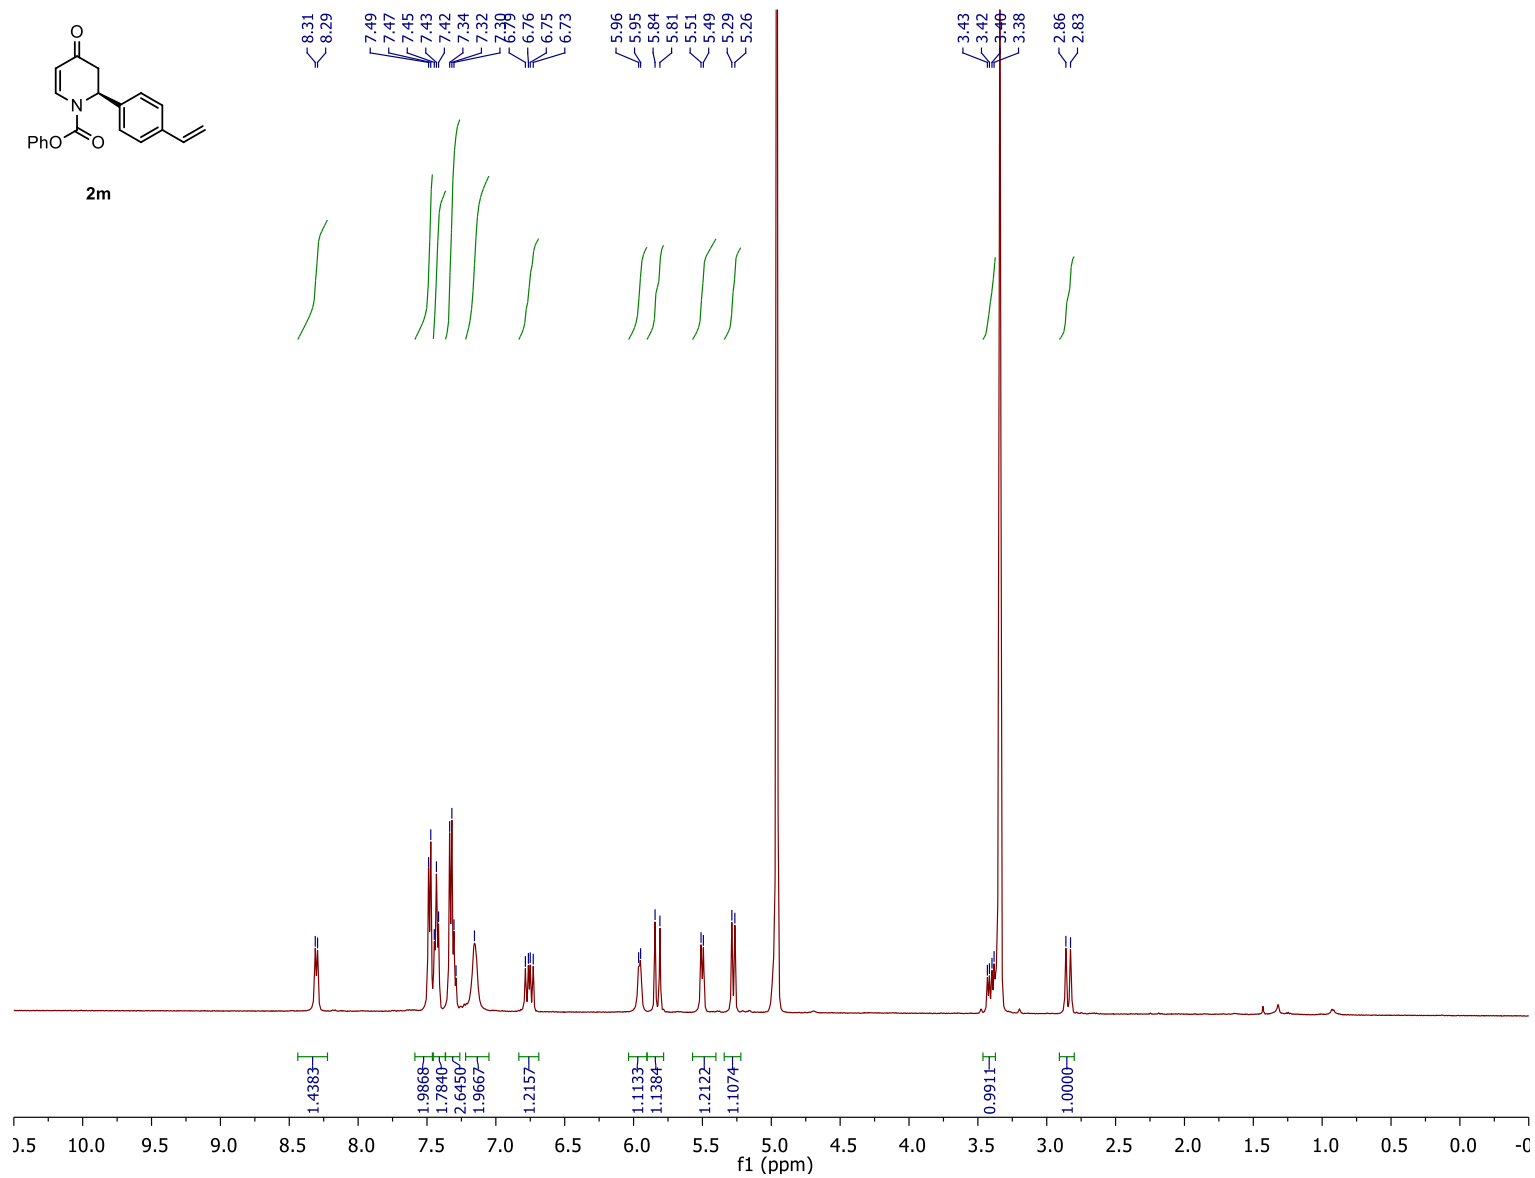

500 MHz <sup>1</sup>H-NMR spectrum of **2m** in MeOD

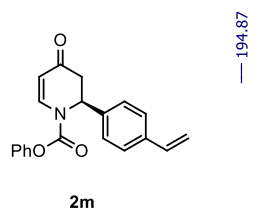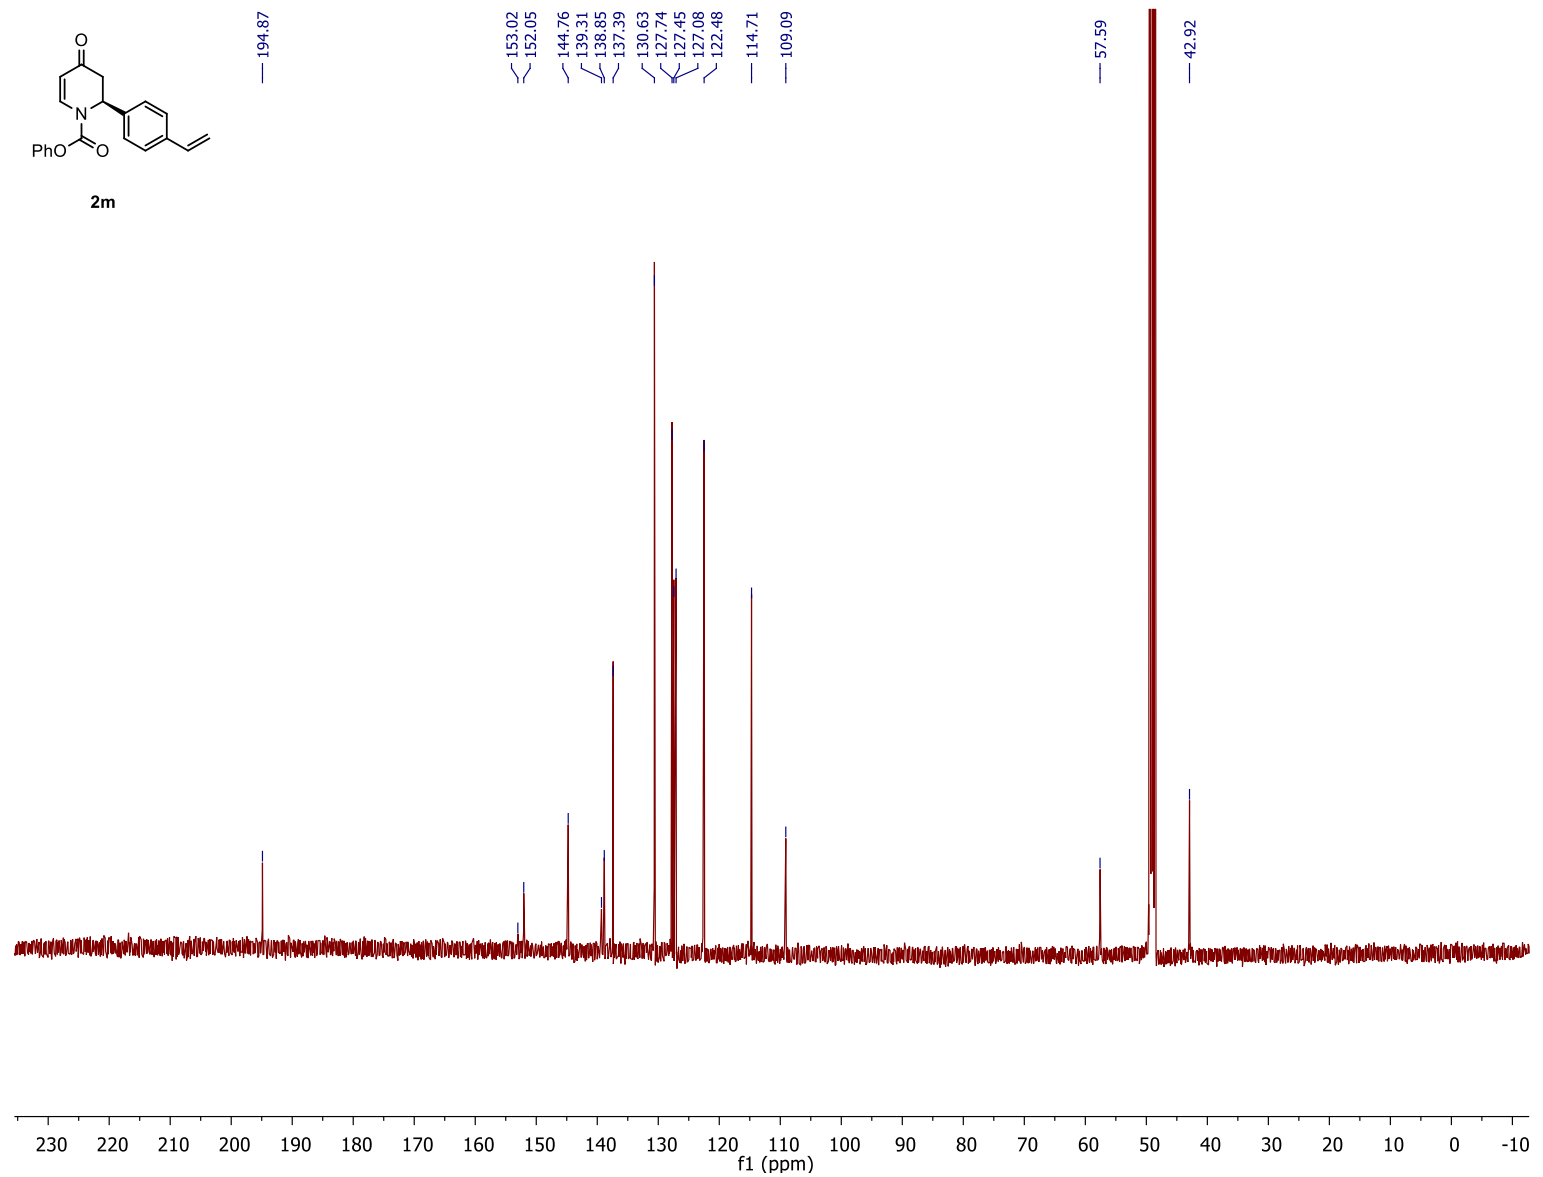

125 MHz <sup>13</sup>C-NMR spectrum of **2m** in MeOD

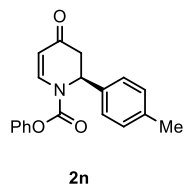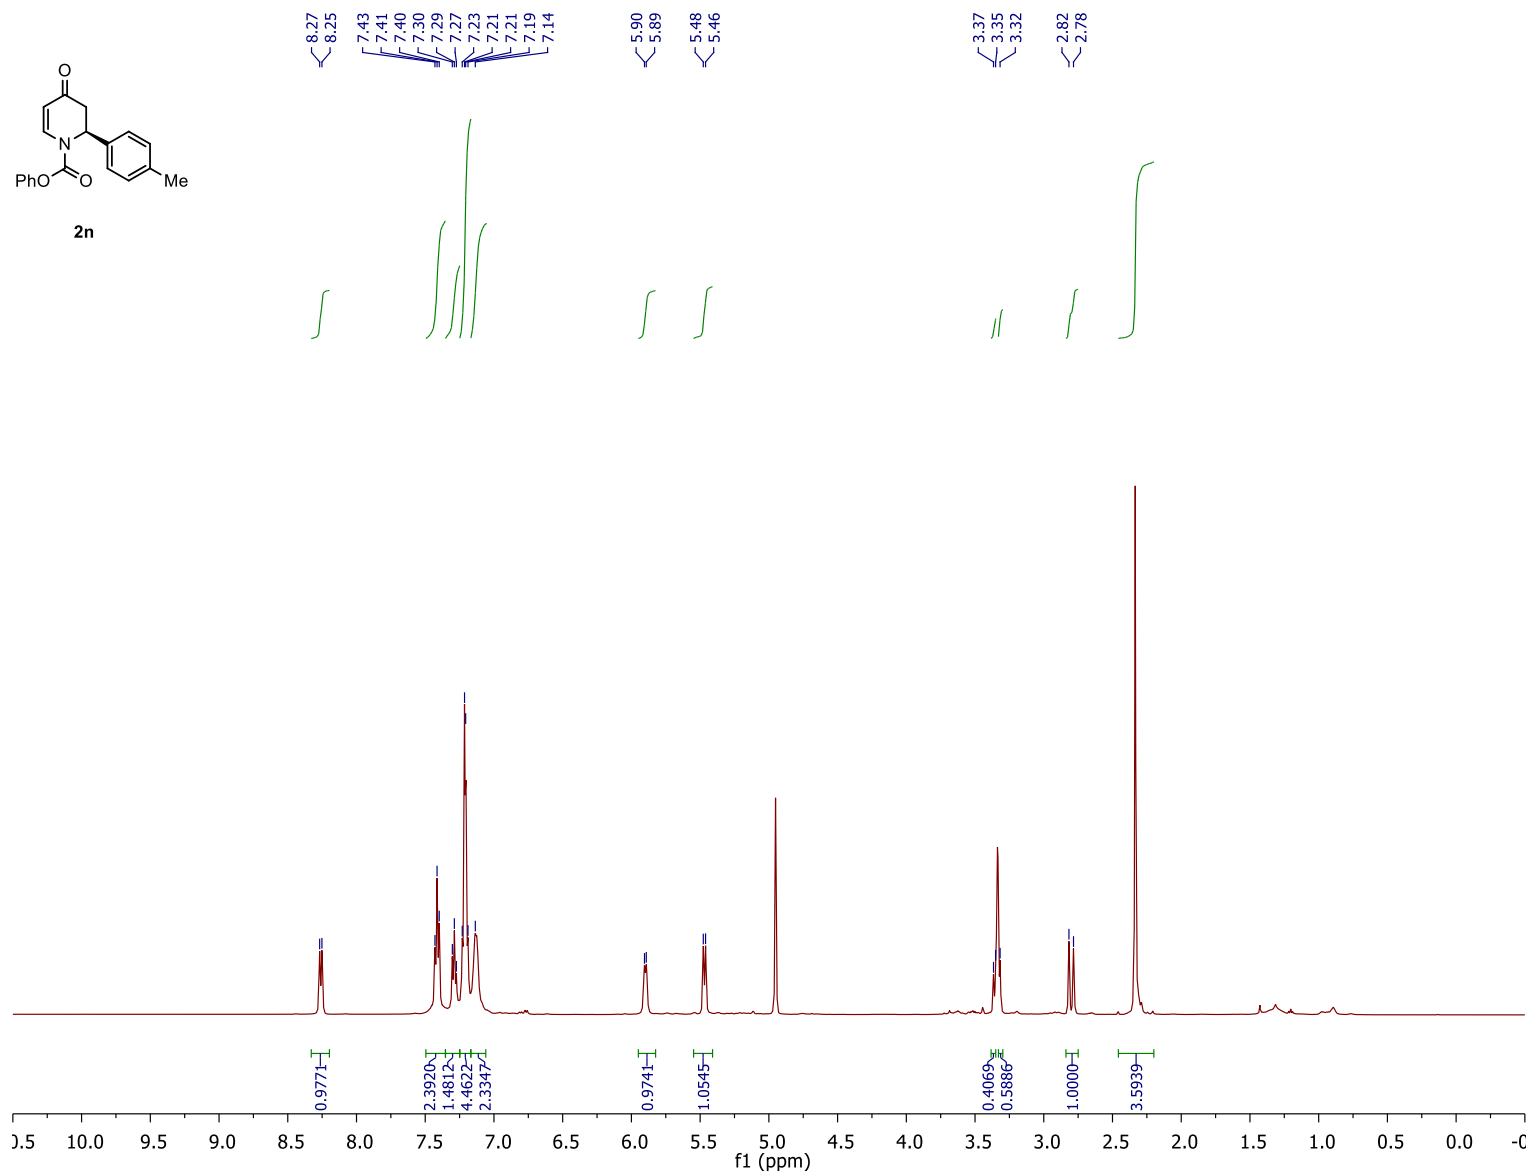

500 MHz  $^1\text{H}$ -NMR spectrum of **2n** in MeOD

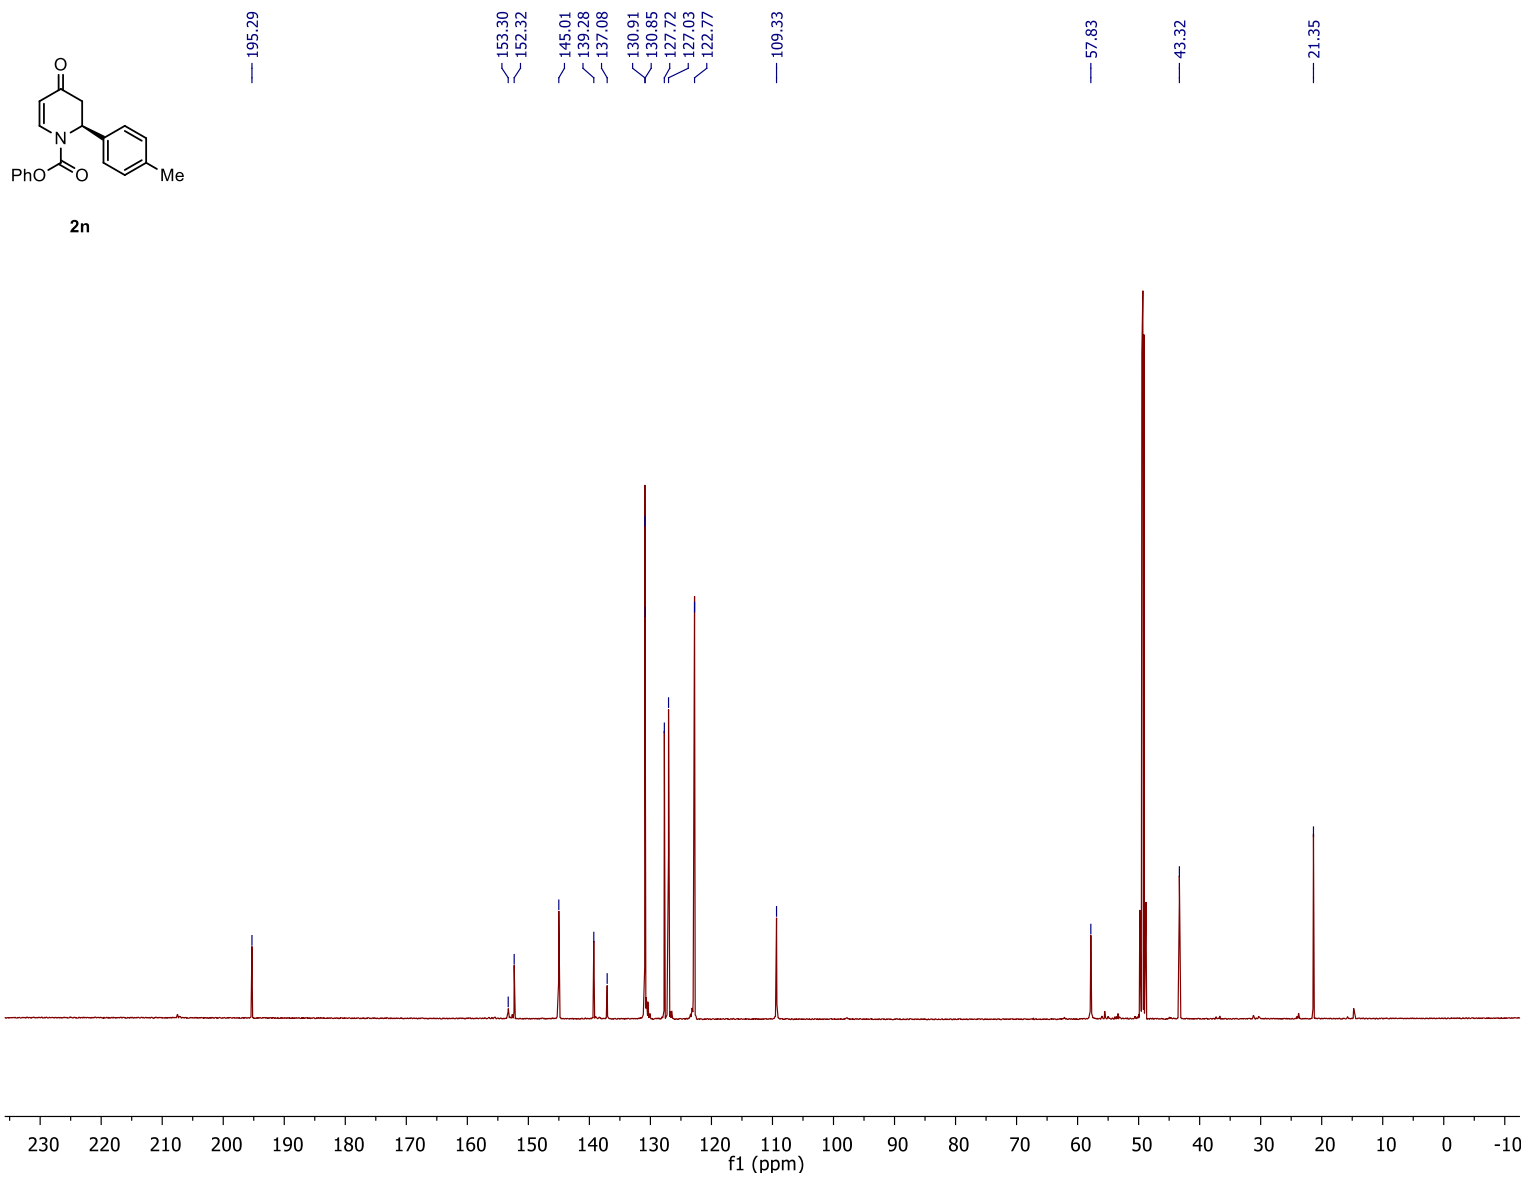

125 MHz  $^{13}\text{C}$ -NMR spectrum of **2n** in MeOD

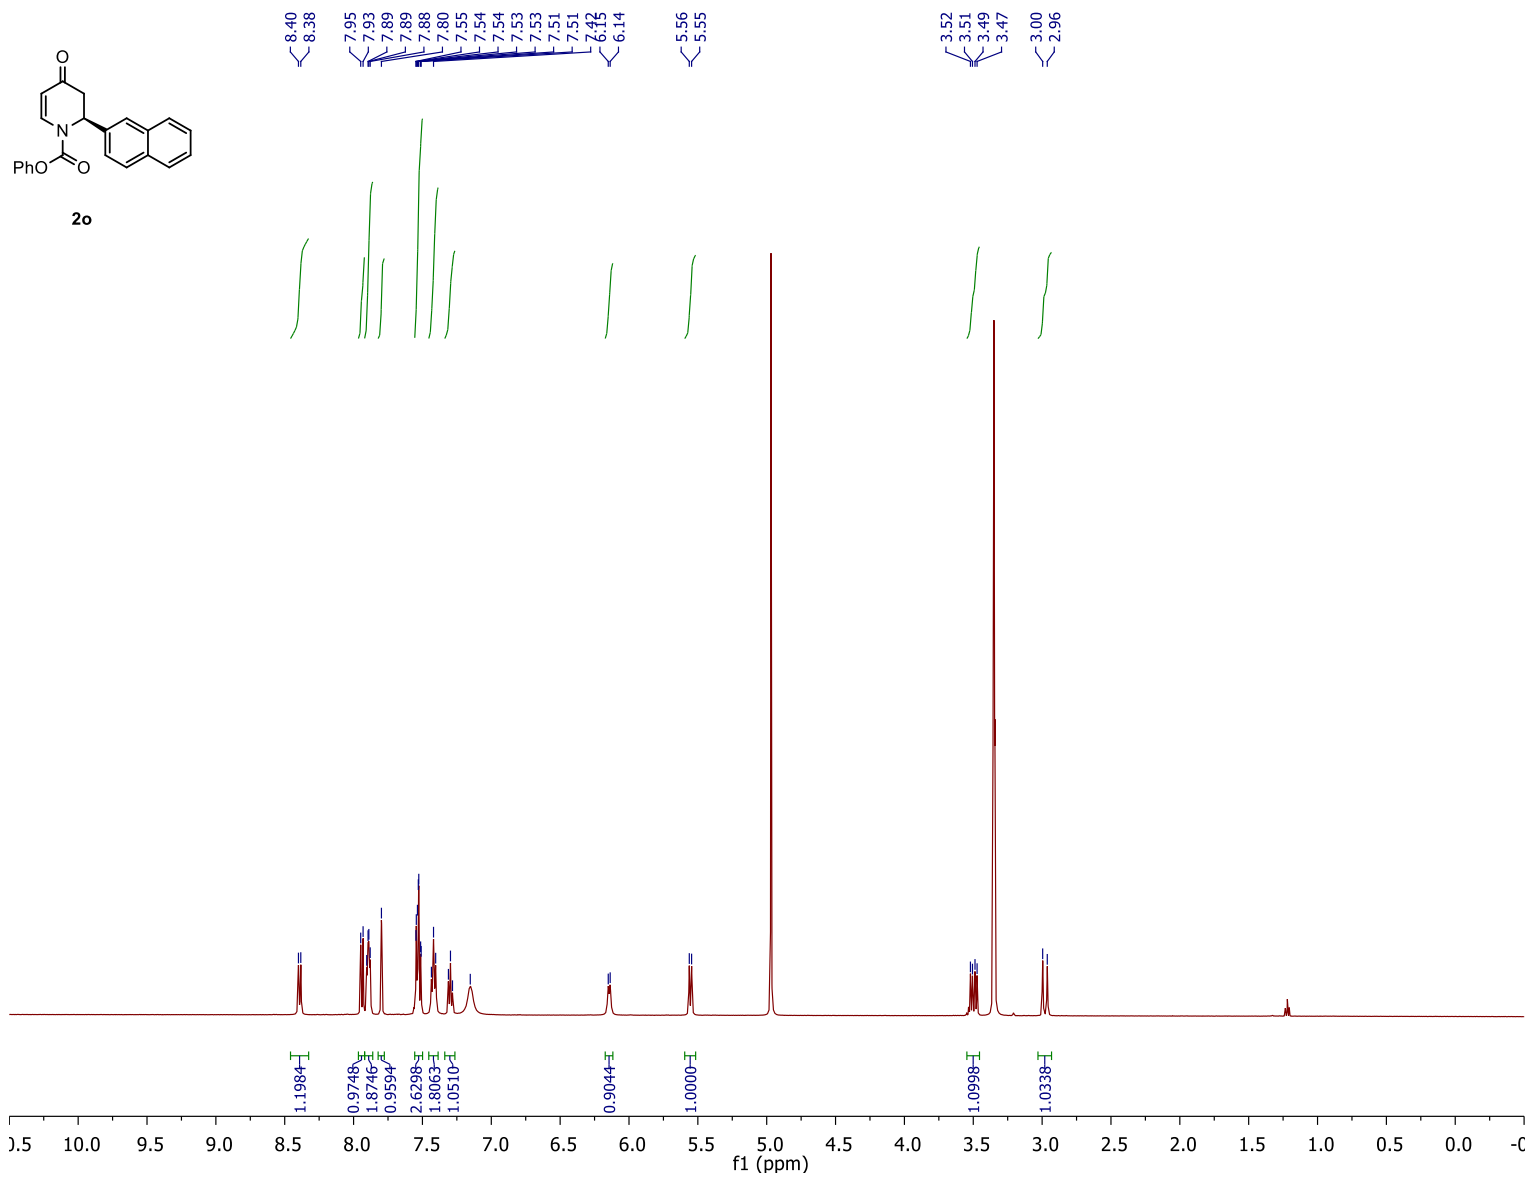

500 MHz <sup>1</sup>H-NMR spectrum of **2o** in MeOD

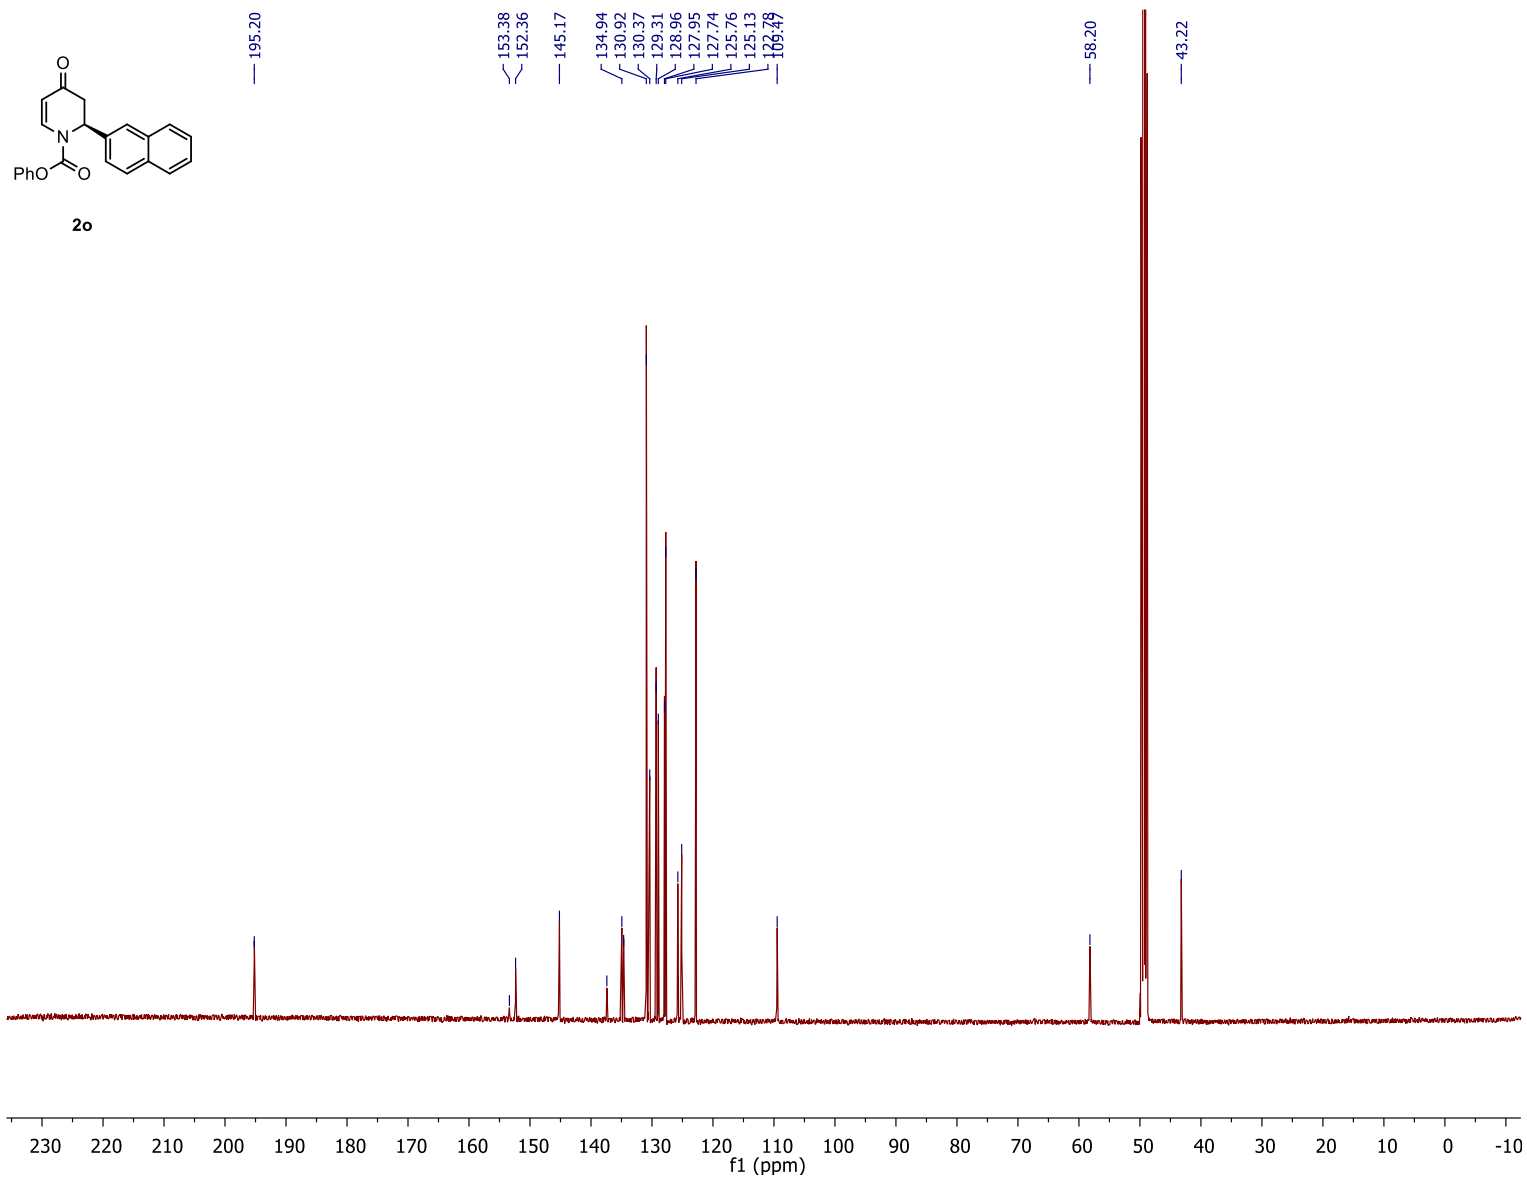

125 MHz  $^{13}\text{C}$ -NMR spectrum of **2o** in MeOD

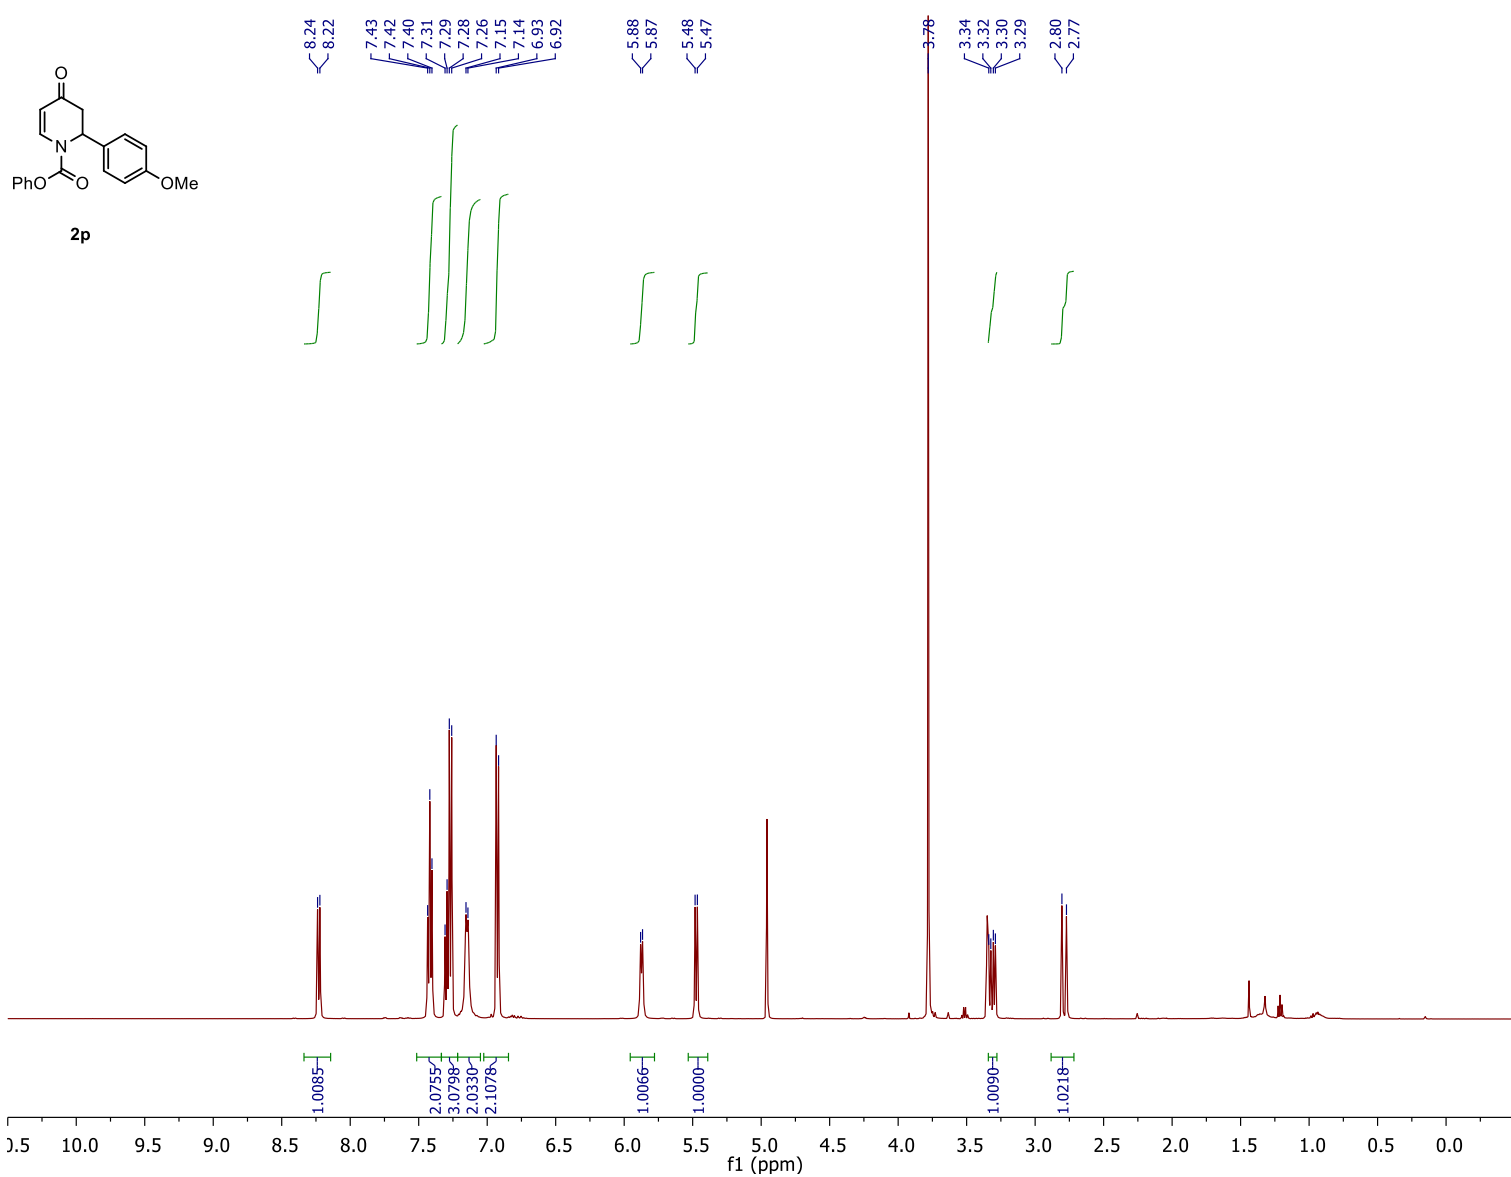

500 MHz <sup>1</sup>H-NMR spectrum of **2p** in MeOD



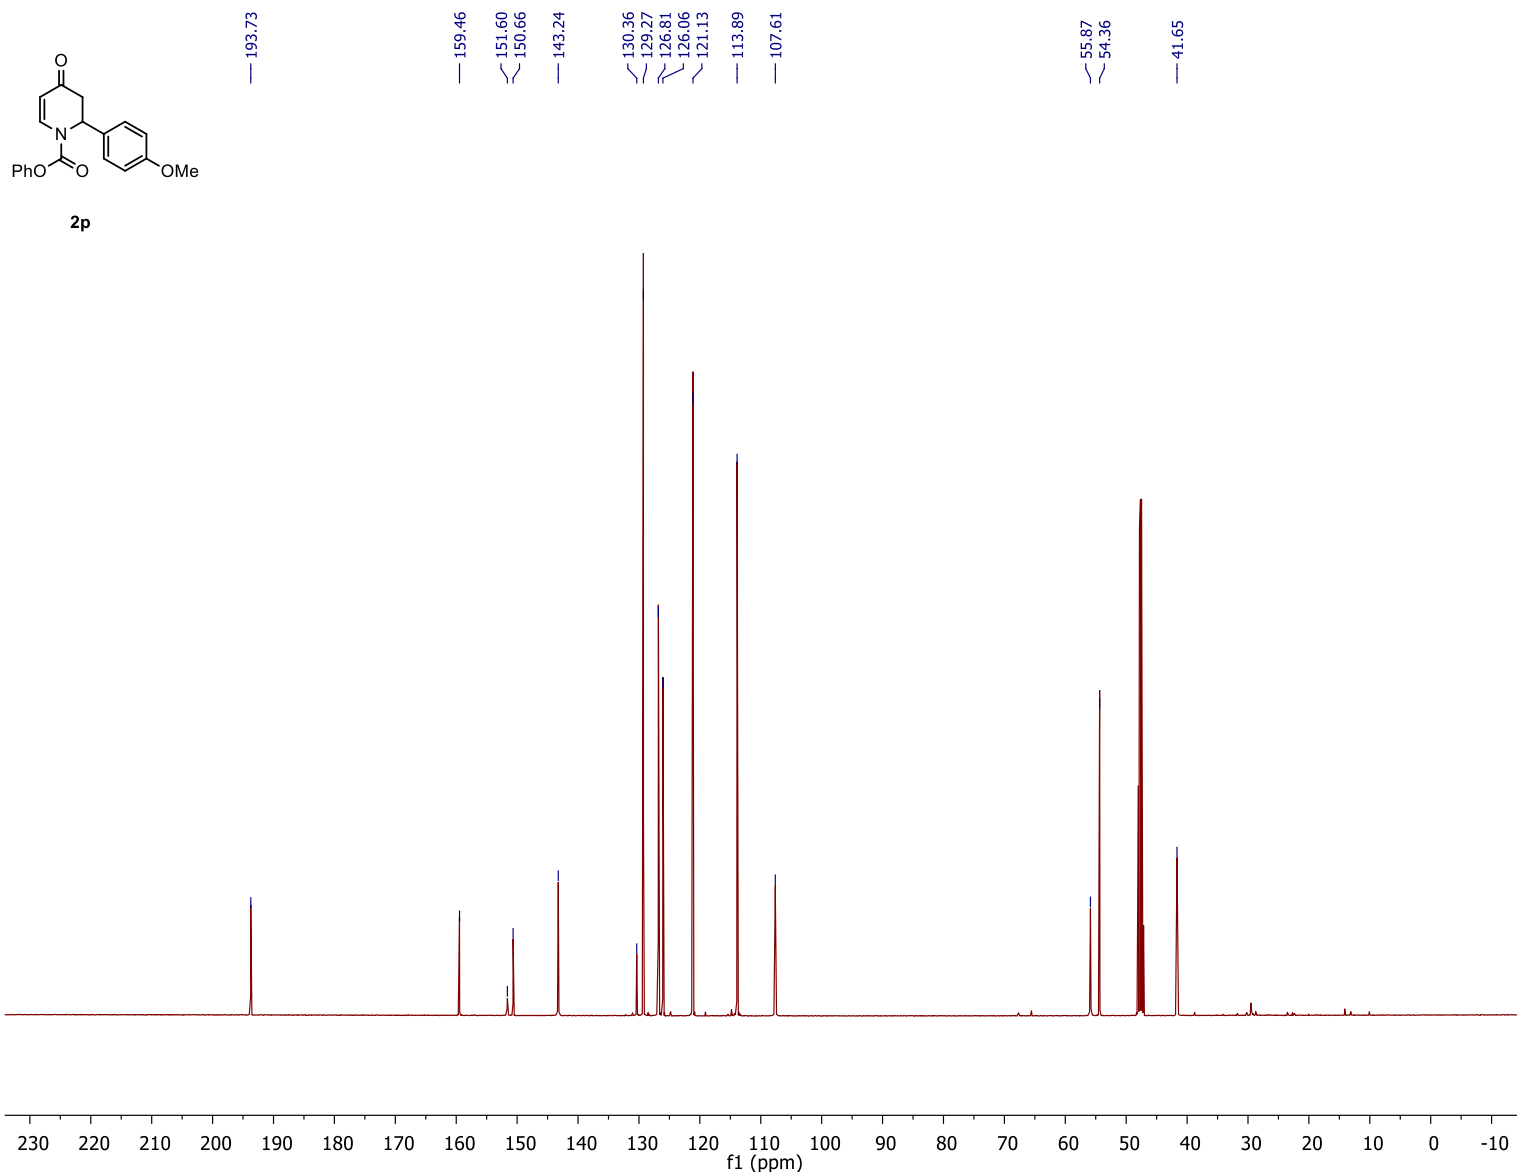

125 MHz  $^{13}\text{C}$ -NMR spectrum of **2p** in MeOD

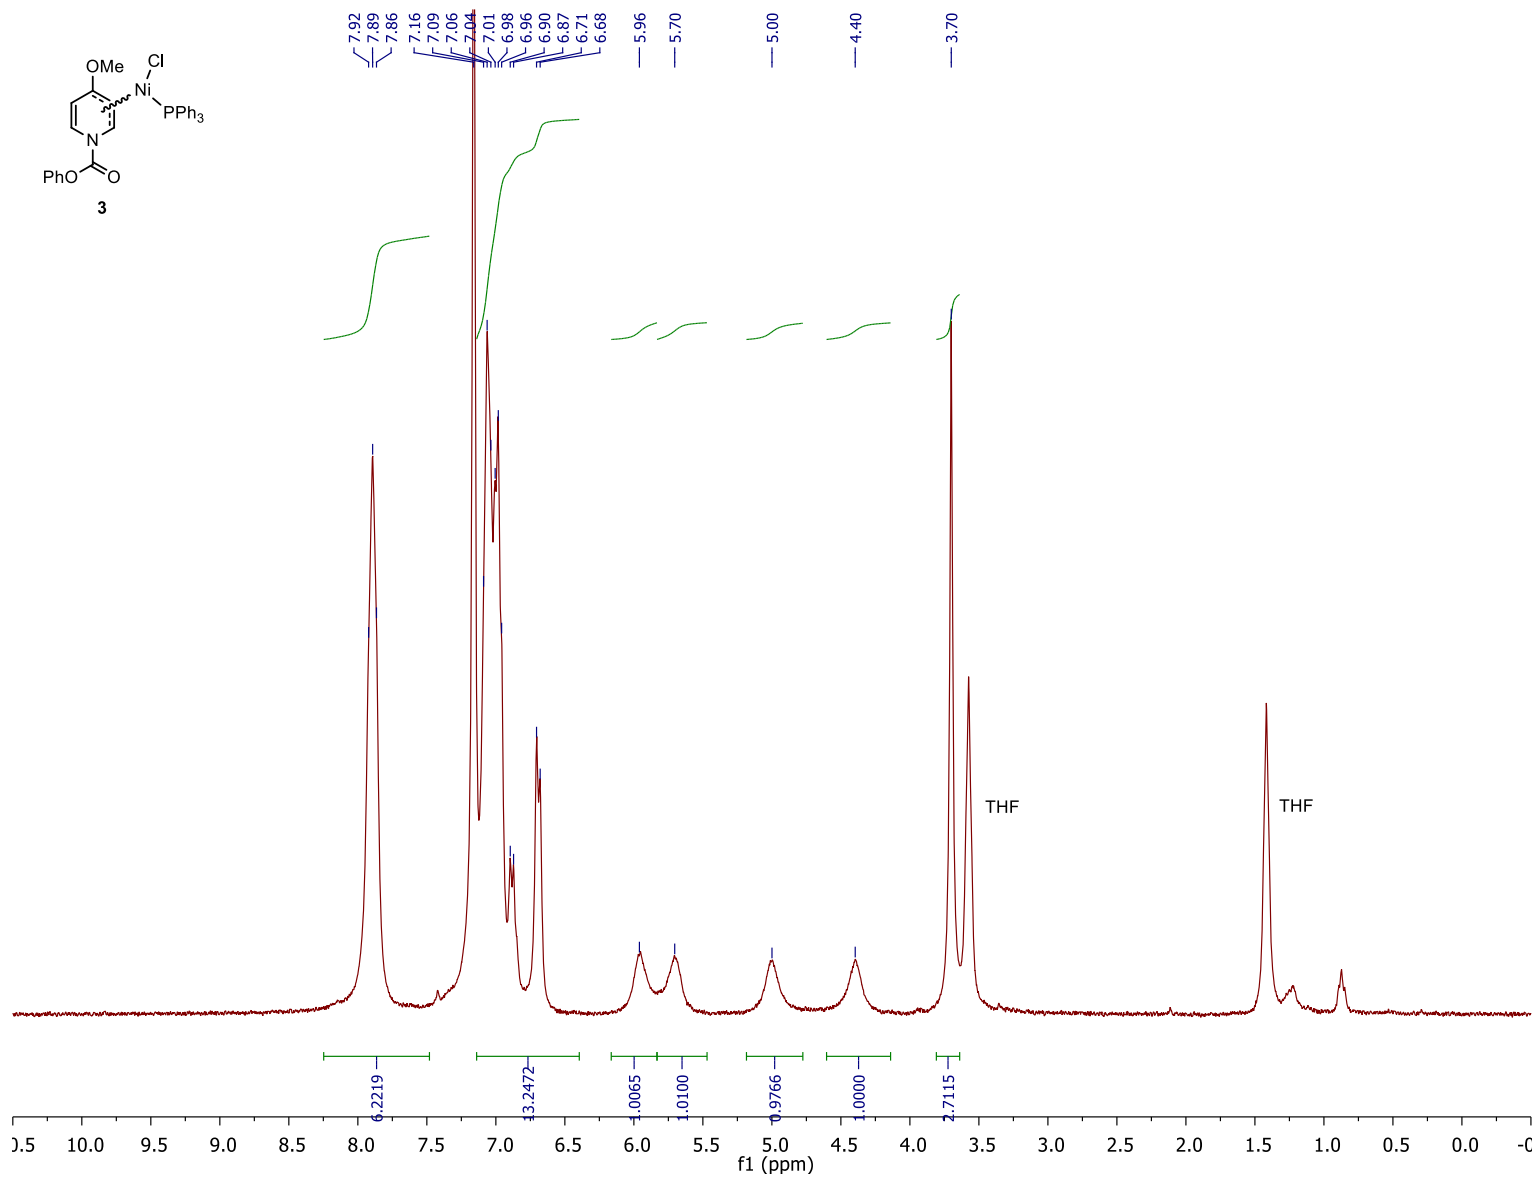

300 MHz <sup>1</sup>H-NMR spectrum of **3** in C<sub>6</sub>D<sub>6</sub>

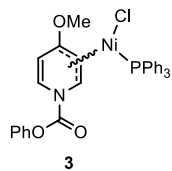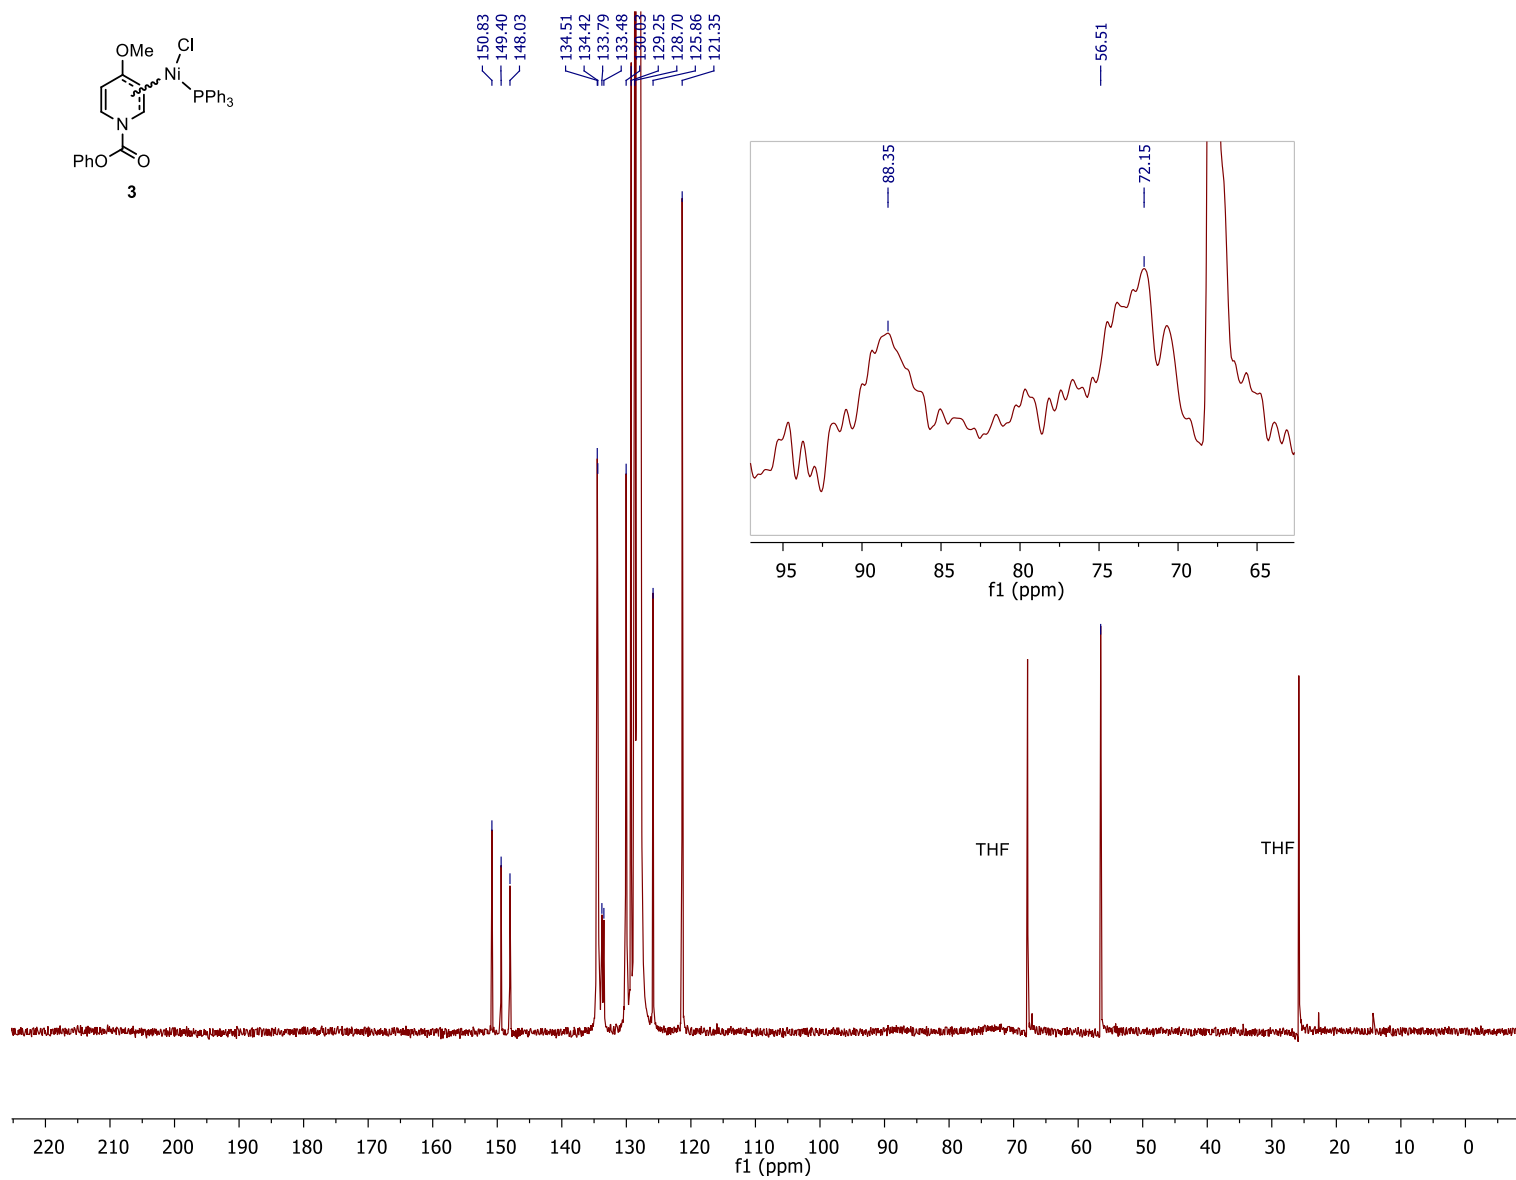

125 MHz  $^{13}\text{C}$ -NMR spectrum of **3** in  $\text{C}_6\text{D}_6$

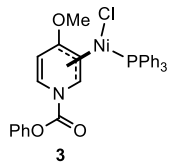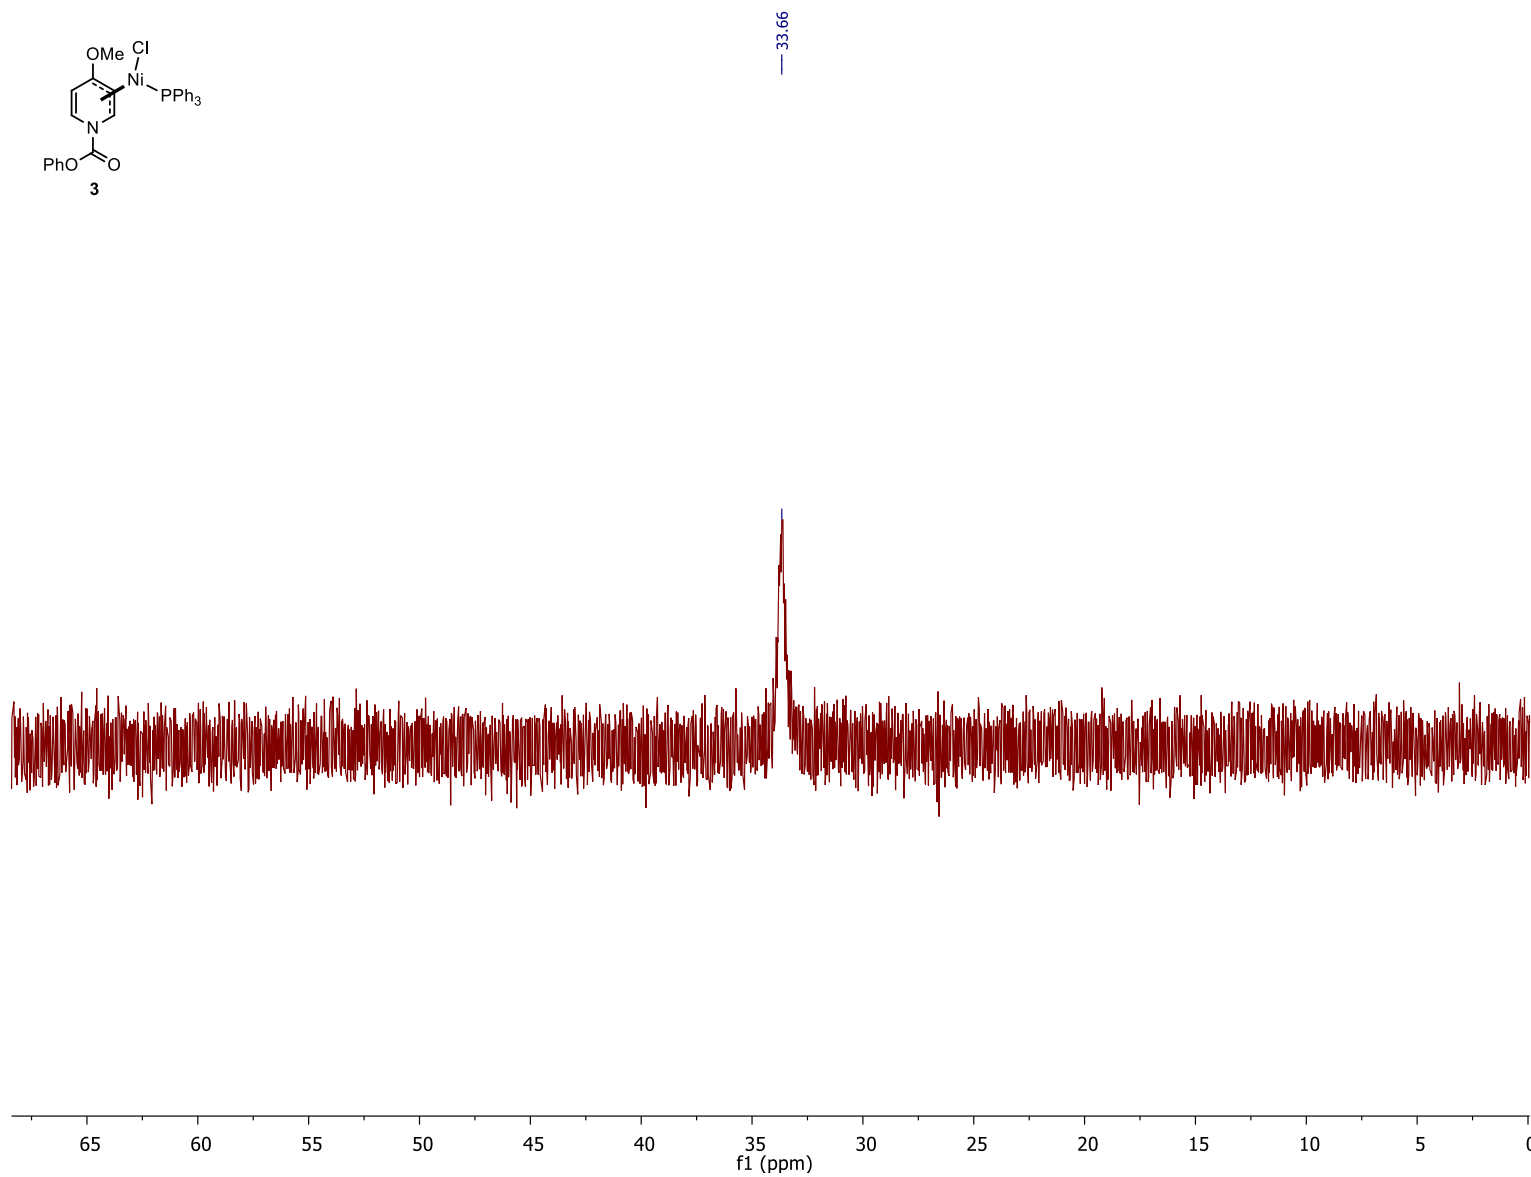

121 MHz  $^{31}\text{P}$ -NMR spectrum of **3** in  $\text{C}_6\text{D}_6$

## VI. Crystallographic Data

### Crystal Structure Report for 2b<sup>7</sup>

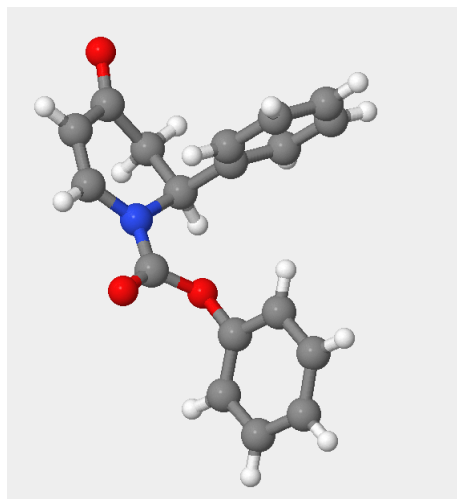

A triangular plate-like specimen of  $C_{18}H_{15}NO_3$ , approximate dimensions 0.160 mm x 0.190 mm x 0.280 mm, was used for the X-ray crystallographic analysis. The X-ray intensity data were measured.

Table S5. Data collection details for 2b.

| Axis  | dx (mm) | 2 $\theta$ (°) | $\omega$ (°) | $\phi$ (°) | $\chi$ (°) | Width (°) | Frames | Time (s) | Wavelength (Å) | Voltage (kV) | Current (mA) | Temp. (K) |
|-------|---------|----------------|--------------|------------|------------|-----------|--------|----------|----------------|--------------|--------------|-----------|
| Omega | 39.947  | 98.00          | -86.00       | -150.00    | 54.50      | 0.50      | 377    | 5.00     | 1.54184        | 45           | 0.7          | 100.01    |
| Omega | 39.947  | 100.00         | -84.00       | 342.00     | 54.50      | 0.50      | 377    | 5.00     | 1.54184        | 45           | 0.7          | 100.01    |
| Phi   | 39.947  | -34.00         | -<br>214.00  | -352.12    | 54.50      | 0.50      | 707    | 5.00     | 1.54184        | 45           | 0.7          | 100.01    |
| Omega | 39.947  | 94.00          | -90.00       | -220.00    | 54.50      | 0.50      | 272    | 5.00     | 1.54184        | 45           | 0.7          | 100.01    |
| Omega | 39.947  | 98.00          | -86.00       | 32.00      | 54.50      | 0.50      | 377    | 5.00     | 1.54184        | 45           | 0.7          | 100.01    |
| Omega | 39.947  | 98.00          | -86.00       | -54.00     | 54.50      | 0.50      | 377    | 5.00     | 1.54184        | 45           | 0.7          | 100.01    |
| Phi   | 39.947  | 62.00          | -84.00       | -45.20     | 54.50      | 0.50      | 101    | 5.00     | 1.54184        | 45           | 0.7          | 100.01    |
| Phi   | 39.947  | 96.00          | 12.00        | 110.93     | 54.50      | 0.50      | 170    | 5.00     | 1.54184        | 45           | 0.7          | 100.01    |
| Omega | 39.947  | 98.00          | -60.77       | 78.00      | 54.50      | 0.50      | 288    | 5.00     | 1.54184        | 45           | 0.7          | 100.01    |

A total of 3046 frames were collected. The total exposure time was 4.23 hours. The frames were integrated with the Bruker SAINT software package using a narrow-frame algorithm. The integration of the data using an orthorhombic unit cell yielded a total of 9563 reflections to a maximum  $\theta$  angle of 65.08° (0.85 Å resolution), of which 2408 were independent (average redundancy 3.971,

<sup>7</sup> For further information on Flack parameters see Flack H.D. *Acta Cryst.* **1983**, A39, 876-881.

completeness = 99.7%,  $R_{\text{int}} = 1.96\%$ ,  $R_{\text{sig}} = 1.83\%$ ) and 2381 (98.88%) were greater than  $2\sigma(F^2)$ . The final cell constants of  $a = 8.309(10) \text{ \AA}$ ,  $b = 8.760(11) \text{ \AA}$ ,  $c = 19.63(2) \text{ \AA}$ , volume =  $1429.(3) \text{ \AA}^3$ , are based upon the refinement of the XYZ-centroids of 221 reflections above  $20 \sigma(I)$  with  $5.324^\circ < 2\theta < 52.99^\circ$ . Data were corrected for absorption effects using the multi-scan method (SADABS). The ratio of minimum to maximum apparent transmission was 0.917. The calculated minimum and maximum transmission coefficients (based on crystal size) are 0.8143 and 0.8881.

The structure was solved and refined using the Bruker SHELXTL Software Package, using the space group P 21 21 21, with  $Z = 4$  for the formula unit,  $\text{C}_{18}\text{H}_{15}\text{NO}_3$ . The final anisotropic full-matrix least-squares refinement on  $F^2$  with 200 variables converged at  $R1 = 2.38\%$ , for the observed data and  $wR2 = 6.88\%$  for all data. The goodness-of-fit was 1.682. The largest peak in the final difference electron density synthesis was  $0.145 \text{ e}^-/\text{\AA}^3$  and the largest hole was  $-0.118 \text{ e}^-/\text{\AA}^3$  with an RMS deviation of  $0.028 \text{ e}^-/\text{\AA}^3$ . On the basis of the final model, the calculated density was  $1.364 \text{ g/cm}^3$  and  $F(000)$ ,  $616 \text{ e}^-$ .

**Table S6. Sample and crystal data for 2b.**

|                               |                                         |                     |
|-------------------------------|-----------------------------------------|---------------------|
| <b>Identification code</b>    | pdjstc                                  |                     |
| <b>Chemical formula</b>       | $\text{C}_{18}\text{H}_{15}\text{NO}_3$ |                     |
| <b>Formula weight</b>         | 293.31                                  |                     |
| <b>Temperature</b>            | 100(2) K                                |                     |
| <b>Wavelength</b>             | 1.54178 $\text{\AA}$                    |                     |
| <b>Crystal size</b>           | 0.160 x 0.190 x 0.280 mm                |                     |
| <b>Crystal system</b>         | orthorhombic                            |                     |
| <b>Space group</b>            | P 21 21 21                              |                     |
| <b>Unit cell dimensions</b>   | $a = 8.309(10) \text{ \AA}$             | $\alpha = 90^\circ$ |
|                               | $b = 8.760(11) \text{ \AA}$             | $\beta = 90^\circ$  |
|                               | $c = 19.63(2) \text{ \AA}$              | $\gamma = 90^\circ$ |
| <b>Volume</b>                 | $1429.(3) \text{ \AA}^3$                |                     |
| <b>Z</b>                      | 4                                       |                     |
| <b>Density (calculated)</b>   | $1.364 \text{ Mg/cm}^3$                 |                     |
| <b>Absorption coefficient</b> | $0.760 \text{ mm}^{-1}$                 |                     |
| <b>F(000)</b>                 | 616                                     |                     |

Table S7. Data collection and structure refinement for 2b.

|                                     |                                                                                                                                                               |                              |
|-------------------------------------|---------------------------------------------------------------------------------------------------------------------------------------------------------------|------------------------------|
| Theta range for data collection     | 4.50 to 65.08°                                                                                                                                                |                              |
| Index ranges                        | -9<=h<=9, -10<=k<=10, -23<=l<=22                                                                                                                              |                              |
| Reflections collected               | 9563                                                                                                                                                          |                              |
| Independent reflections             | 2408 [R(int) = 0.0196]                                                                                                                                        |                              |
| Coverage of independent reflections | 99.7%                                                                                                                                                         |                              |
| Absorption correction               | multi-scan                                                                                                                                                    |                              |
| Max. and min. transmission          | 0.8881 and 0.8143                                                                                                                                             |                              |
| Structure solution technique        | direct methods                                                                                                                                                |                              |
| Structure solution program          | SHELXS-97 (Sheldrick, 2008)                                                                                                                                   |                              |
| Refinement method                   | Full-matrix least-squares on F <sup>2</sup>                                                                                                                   |                              |
| Refinement program                  | SHELXL-97 (Sheldrick, 2008)                                                                                                                                   |                              |
| Function minimized                  | $\sum w(F_o^2 - F_c^2)^2$                                                                                                                                     |                              |
| Data / restraints / parameters      | 2408 / 0 / 200                                                                                                                                                |                              |
| Goodness-of-fit on F <sup>2</sup>   | 1.682                                                                                                                                                         |                              |
| $\Delta/\sigma_{\max}$              | 0.012                                                                                                                                                         |                              |
| Final R indices                     | 2381 data;<br>I>2σ(I)                                                                                                                                         | R1 = 0.0238, wR2 =<br>0.0686 |
|                                     | all data                                                                                                                                                      | R1 = 0.0242, wR2 =<br>0.0688 |
| Weighting scheme                    | w=1/[σ <sup>2</sup> (F <sub>o</sub> <sup>2</sup> )+(0.0338P) <sup>2</sup> +0.0000P]<br>where P=(F <sub>o</sub> <sup>2</sup> +2F <sub>c</sub> <sup>2</sup> )/3 |                              |
| Absolute structure parameter        | 0.0(1)                                                                                                                                                        |                              |
| Extinction coefficient              | 0.0015(5)                                                                                                                                                     |                              |
| Largest diff. peak and hole         | 0.145 and -0.118 eÅ <sup>-3</sup>                                                                                                                             |                              |
| R.M.S. deviation from mean          | 0.028 eÅ <sup>-3</sup>                                                                                                                                        |                              |

**Table S8. Atomic coordinates and equivalent isotropic atomic displacement parameters ( $\text{\AA}^2$ ) for 2b.**U(eq) is defined as one third of the trace of the orthogonalized  $U_{ij}$  tensor.

|            | x/a         | y/b         | z/c        | U(eq)     |
|------------|-------------|-------------|------------|-----------|
| <b>O1</b>  | 0.82529(11) | 0.92524(9)  | 0.75553(4) | 0.0301(2) |
| <b>O2</b>  | 0.03192(11) | 0.04206(9)  | 0.70171(4) | 0.0311(2) |
| <b>O3</b>  | 0.30747(11) | 0.89570(9)  | 0.98620(4) | 0.0300(2) |
| <b>N1</b>  | 0.06373(11) | 0.93344(10) | 0.80717(5) | 0.0238(2) |
| <b>C1</b>  | 0.46724(16) | 0.10560(17) | 0.63344(8) | 0.0405(3) |
| <b>C2</b>  | 0.50248(17) | 0.17225(15) | 0.69511(8) | 0.0416(3) |
| <b>C3</b>  | 0.62507(17) | 0.11540(14) | 0.73541(6) | 0.0341(3) |
| <b>C4</b>  | 0.71032(13) | 0.99119(12) | 0.71203(5) | 0.0247(2) |
| <b>C5</b>  | 0.97867(14) | 0.97414(12) | 0.74959(6) | 0.0245(2) |
| <b>C6</b>  | 0.97771(14) | 0.87675(12) | 0.86781(5) | 0.0223(2) |
| <b>C7</b>  | 0.88464(13) | 0.00434(12) | 0.90250(5) | 0.0218(2) |
| <b>C8</b>  | 0.91417(14) | 0.15840(13) | 0.89128(6) | 0.0260(3) |
| <b>C9</b>  | 0.82768(16) | 0.26860(13) | 0.92568(6) | 0.0288(3) |
| <b>C10</b> | 0.70997(16) | 0.22698(13) | 0.97169(6) | 0.0302(3) |
| <b>C11</b> | 0.55572(17) | 0.98324(16) | 0.61102(7) | 0.0372(3) |
| <b>C12</b> | 0.67824(16) | 0.92445(13) | 0.65050(6) | 0.0301(3) |
| <b>C13</b> | 0.21796(14) | 0.98980(12) | 0.81454(6) | 0.0264(2) |
| <b>C14</b> | 0.30218(14) | 0.98082(12) | 0.87234(6) | 0.0273(2) |
| <b>C15</b> | 0.24267(14) | 0.89491(12) | 0.93043(5) | 0.0249(3) |
| <b>C16</b> | 0.09762(14) | 0.79833(12) | 0.91524(6) | 0.0241(2) |
| <b>C17</b> | 0.67672(16) | 0.07357(14) | 0.98197(6) | 0.0319(3) |
| <b>C18</b> | 0.76431(15) | 0.96391(13) | 0.94804(6) | 0.0277(3) |



**Table S9. Bond lengths (Å) for 2b.**

|                 |            |                 |            |
|-----------------|------------|-----------------|------------|
| <b>O1-C5</b>    | 1.349(2)   | <b>O1-C4</b>    | 1.4055(17) |
| <b>O2-C5</b>    | 1.1973(17) | <b>O3-C15</b>   | 1.2200(19) |
| <b>N1-C5</b>    | 1.3800(19) | <b>N1-C13</b>   | 1.381(2)   |
| <b>N1-C6</b>    | 1.4745(19) | <b>C1-C11</b>   | 1.372(2)   |
| <b>C1-C2</b>    | 1.375(3)   | <b>C1-H1</b>    | 0.95       |
| <b>C2-C3</b>    | 1.383(2)   | <b>C2-H2</b>    | 0.95       |
| <b>C3-C4</b>    | 1.377(2)   | <b>C3-H3</b>    | 0.95       |
| <b>C4-C12</b>   | 1.368(2)   | <b>C6-C7</b>    | 1.5202(19) |
| <b>C6-C16</b>   | 1.5269(19) | <b>C6-H6</b>    | 1.0        |
| <b>C7-C18</b>   | 1.3872(19) | <b>C7-C8</b>    | 1.389(2)   |
| <b>C8-C9</b>    | 1.380(2)   | <b>C8-H8</b>    | 0.95       |
| <b>C9-C10</b>   | 1.380(2)   | <b>C9-H9</b>    | 0.95       |
| <b>C10-C17</b>  | 1.387(2)   | <b>C10-H10</b>  | 0.95       |
| <b>C11-C12</b>  | 1.379(2)   | <b>C11-H11</b>  | 0.95       |
| <b>C12-H12</b>  | 0.95       | <b>C13-C14</b>  | 1.335(2)   |
| <b>C13-H13</b>  | 0.95       | <b>C14-C15</b>  | 1.453(2)   |
| <b>C14-H14</b>  | 0.95       | <b>C15-C16</b>  | 1.502(2)   |
| <b>C16-H16A</b> | 0.99       | <b>C16-H16B</b> | 0.99       |
| <b>C17-C18</b>  | 1.377(2)   | <b>C17-H17</b>  | 0.95       |
| <b>C18-H18</b>  | 0.95       |                 |            |

**Table S10. Bond angles (°) for 2b.**

|                    |            |                      |            |
|--------------------|------------|----------------------|------------|
| <b>C5-O1-C4</b>    | 117.31(10) | <b>C5-N1-C13</b>     | 117.95(10) |
| <b>C5-N1-C6</b>    | 120.00(12) | <b>C13-N1-C6</b>     | 119.06(10) |
| <b>C11-C1-C2</b>   | 119.98(13) | <b>C11-C1-H1</b>     | 120.0      |
| <b>C2-C1-H1</b>    | 120.0      | <b>C1-C2-C3</b>      | 120.50(13) |
| <b>C1-C2-H2</b>    | 119.7      | <b>C3-C2-H2</b>      | 119.7      |
| <b>C4-C3-C2</b>    | 118.22(13) | <b>C4-C3-H3</b>      | 120.9      |
| <b>C2-C3-H3</b>    | 120.9      | <b>C12-C4-C3</b>     | 122.12(11) |
| <b>C12-C4-O1</b>   | 119.55(12) | <b>C3-C4-O1</b>      | 118.16(12) |
| <b>O2-C5-O1</b>    | 125.07(11) | <b>O2-C5-N1</b>      | 125.61(13) |
| <b>O1-C5-N1</b>    | 109.32(11) | <b>N1-C6-C7</b>      | 111.14(10) |
| <b>N1-C6-C16</b>   | 109.12(12) | <b>C7-C6-C16</b>     | 112.92(11) |
| <b>N1-C6-H6</b>    | 107.8      | <b>C7-C6-H6</b>      | 107.8      |
| <b>C16-C6-H6</b>   | 107.8      | <b>C18-C7-C8</b>     | 118.52(10) |
| <b>C18-C7-C6</b>   | 117.88(11) | <b>C8-C7-C6</b>      | 123.59(12) |
| <b>C9-C8-C7</b>    | 120.66(13) | <b>C9-C8-H8</b>      | 119.7      |
| <b>C7-C8-H8</b>    | 119.7      | <b>C10-C9-C8</b>     | 120.29(12) |
| <b>C10-C9-H9</b>   | 119.9      | <b>C8-C9-H9</b>      | 119.9      |
| <b>C9-C10-C17</b>  | 119.50(11) | <b>C9-C10-H10</b>    | 120.3      |
| <b>C17-C10-H10</b> | 120.3      | <b>C1-C11-C12</b>    | 120.45(14) |
| <b>C1-C11-H11</b>  | 119.8      | <b>C12-C11-H11</b>   | 119.8      |
| <b>C4-C12-C11</b>  | 118.71(13) | <b>C4-C12-H12</b>    | 120.6      |
| <b>C11-C12-H12</b> | 120.6      | <b>C14-C13-N1</b>    | 123.66(11) |
| <b>C14-C13-H13</b> | 118.2      | <b>N1-C13-H13</b>    | 118.2      |
| <b>C13-C14-C15</b> | 121.27(12) | <b>C13-C14-H14</b>   | 119.4      |
| <b>C15-C14-H14</b> | 119.4      | <b>O3-C15-C14</b>    | 123.45(13) |
| <b>O3-C15-C16</b>  | 122.37(11) | <b>C14-C15-C16</b>   | 114.13(11) |
| <b>C15-C16-C6</b>  | 113.03(11) | <b>C15-C16-H16A</b>  | 109.0      |
| <b>C6-C16-H16A</b> | 109.0      | <b>C15-C16-H16B</b>  | 109.0      |
| <b>C6-C16-H16B</b> | 109.0      | <b>H16A-C16-H16B</b> | 107.8      |
| <b>C18-C17-C10</b> | 120.02(14) | <b>C18-C17-H17</b>   | 120.0      |
| <b>C10-C17-H17</b> | 120.0      | <b>C17-C18-C7</b>    | 120.97(12) |
| <b>C17-C18-H18</b> | 119.5      | <b>C7-C18-H18</b>    | 119.5      |

**Table S11. Anisotropic atomic displacement parameters ( $\text{\AA}^2$ ) for 2b.**

The anisotropic atomic displacement factor exponent takes the form:

$$-2\pi^2 [ h^2 a^{*2} U_{11} + \dots + 2 h k a^* b^* U_{12} ]$$

|            | $U_{11}$  | $U_{22}$  | $U_{33}$  | $U_{23}$   | $U_{13}$   | $U_{12}$   |
|------------|-----------|-----------|-----------|------------|------------|------------|
| <b>O1</b>  | 0.0279(4) | 0.0339(4) | 0.0287(4) | 0.0102(3)  | -0.0064(3) | -0.0072(4) |
| <b>O2</b>  | 0.0318(4) | 0.0344(4) | 0.0271(4) | 0.0101(4)  | 0.0030(3)  | 0.0008(4)  |
| <b>O3</b>  | 0.0324(4) | 0.0264(4) | 0.0313(4) | 0.0016(3)  | -0.0072(4) | 0.0004(3)  |
| <b>N1</b>  | 0.0253(5) | 0.0224(4) | 0.0237(5) | 0.0028(4)  | 0.0008(4)  | -0.0002(4) |
| <b>C1</b>  | 0.0256(6) | 0.0458(7) | 0.0501(8) | 0.0200(6)  | -0.0014(6) | -0.0020(6) |
| <b>C2</b>  | 0.0362(7) | 0.0298(6) | 0.0587(9) | 0.0090(6)  | 0.0177(6)  | 0.0072(6)  |
| <b>C3</b>  | 0.0406(7) | 0.0293(6) | 0.0323(6) | -0.0022(5) | 0.0079(5)  | -0.0027(5) |
| <b>C4</b>  | 0.0252(5) | 0.0241(5) | 0.0248(5) | 0.0062(4)  | -0.0012(4) | -0.0042(4) |
| <b>C5</b>  | 0.0292(6) | 0.0198(5) | 0.0244(5) | 0.0010(4)  | -0.0001(4) | 0.0006(5)  |
| <b>C6</b>  | 0.0258(6) | 0.0186(5) | 0.0224(5) | 0.0020(4)  | 0.0010(4)  | -0.0022(4) |
| <b>C7</b>  | 0.0219(5) | 0.0225(5) | 0.0209(5) | 0.0017(4)  | -0.0047(4) | -0.0006(4) |
| <b>C8</b>  | 0.0242(6) | 0.0232(5) | 0.0307(6) | 0.0011(4)  | -0.0014(5) | -0.0025(5) |
| <b>C9</b>  | 0.0299(6) | 0.0207(5) | 0.0358(6) | -0.0006(4) | -0.0065(5) | -0.0002(5) |
| <b>C10</b> | 0.0302(7) | 0.0279(6) | 0.0326(6) | -0.0035(5) | -0.0030(5) | 0.0085(5)  |
| <b>C11</b> | 0.0350(6) | 0.0433(7) | 0.0335(6) | 0.0044(5)  | -0.0087(5) | -0.0092(6) |
| <b>C12</b> | 0.0344(6) | 0.0257(5) | 0.0304(6) | -0.0003(5) | -0.0013(5) | -0.0020(5) |
| <b>C13</b> | 0.0248(6) | 0.0242(5) | 0.0302(5) | 0.0032(4)  | 0.0045(4)  | 0.0009(4)  |
| <b>C14</b> | 0.0221(5) | 0.0246(5) | 0.0352(6) | 0.0018(5)  | -0.0003(5) | -0.0007(5) |
| <b>C15</b> | 0.0253(6) | 0.0193(5) | 0.0302(6) | -0.0007(4) | -0.0011(5) | 0.0071(5)  |
| <b>C16</b> | 0.0273(6) | 0.0189(5) | 0.0259(5) | 0.0020(4)  | -0.0006(4) | 0.0007(5)  |
| <b>C17</b> | 0.0311(6) | 0.0338(6) | 0.0309(6) | 0.0022(5)  | 0.0058(5)  | 0.0007(6)  |
| <b>C18</b> | 0.0314(6) | 0.0234(5) | 0.0282(5) | 0.0028(4)  | 0.0020(5)  | -0.0012(5) |

**Table S12. Hydrogen atomic coordinates and isotropic atomic displacement parameters ( $\text{\AA}^2$ ) for 2b.**

|             | <b>x/a</b> | <b>y/b</b> | <b>z/c</b> | <b>U(eq)</b> |
|-------------|------------|------------|------------|--------------|
| <b>H1</b>   | 0.3817     | 0.1443     | 0.6064     | 0.049        |
| <b>H2</b>   | 0.4421     | 0.2580     | 0.7101     | 0.05         |
| <b>H3</b>   | 0.6498     | 0.1608     | 0.7781     | 0.041        |
| <b>H6</b>   | 0.8983     | -0.2017    | 0.8523     | 0.027        |
| <b>H8</b>   | 0.9947     | 0.1882     | 0.8596     | 0.031        |
| <b>H9</b>   | 0.8492     | 0.3736     | 0.9177     | 0.035        |
| <b>H10</b>  | 0.6522     | 0.3029     | 0.9961     | 0.036        |
| <b>H11</b>  | 0.5324     | -0.0613    | 0.5680     | 0.045        |
| <b>H12</b>  | 0.7392     | -0.1607    | 0.6353     | 0.036        |
| <b>H13</b>  | 1.2669     | 0.0376     | 0.7764     | 0.032        |
| <b>H14</b>  | 1.4029     | 0.0316     | 0.8755     | 0.033        |
| <b>H16A</b> | 1.0428     | -0.2271    | 0.9586     | 0.029        |
| <b>H16B</b> | 1.1333     | -0.2985    | 0.8941     | 0.029        |
| <b>H17</b>  | 0.5935     | 0.0441     | 1.0124     | 0.038        |
| <b>H18</b>  | 0.7420     | -0.1410    | 0.9559     | 0.033        |

### Crystal Structure Report for 3

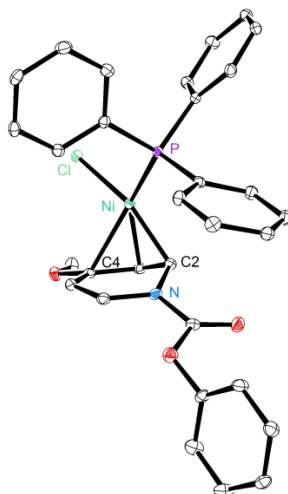

A translucent dark purple-brown irregular rod-like specimen of  $C_{31}H_{27}ClNiNO_3P$ , approximate dimensions 0.040 mm x 0.130 mm x 0.140 mm, was used for the X-ray crystallographic analysis. The X-ray intensity data were measured.

The structure of **3** is comparable to a quinolinium-derived  $\pi$ -allyl intermediate that we previously reported in the context of our mechanistic investigation of allylic *N,O*-acetal C–O oxidative addition of 1-ethoxycarbonyl-1,2-dihydroquinoline (EEDQ) (C2–C3, C3–C4 1.438, 1.394 Å [3] vs. C2–C3, C3–C4 1.404, 1.394 Å [1, Scheme 1]).

**Table S13: Data collection details for 3.**

| Axis  | Dx (mm) | 2 $\theta$ (°) | $\omega$ (°) | $\phi$ (°) | $\chi$ (°) | Width (°) | Frames | Time(s) | Wavelength (Å) | Voltage (kV) | Current (mA) | Temp. (K) |
|-------|---------|----------------|--------------|------------|------------|-----------|--------|---------|----------------|--------------|--------------|-----------|
| Omega | 40.000  | 88.00          | -95.62       | -190.00    | 54.50      | 0.50      | 371    | 15.00   | 1.54184        | 45           | 0.7          | 99.99     |
| Phi   | 40.000  | 94.00          | -64.00       | -360.00    | 54.50      | 0.50      | 739    | 15.00   | 1.54184        | 45           | 0.7          | 99.99     |
| Phi   | 40.000  | -52.00         | -            | -358.32    | 54.50      | 0.50      | 720    | 15.00   | 1.54184        | 45           | 0.7          | 99.99     |
| Phi   | 40.000  | 82.00          | -38.00       | -356.94    | 54.50      | 0.50      | 721    | 15.00   | 1.54184        | 45           | 0.7          | 99.99     |
| Omega | 40.000  | 100.00         | -83.53       | 342.00     | 54.50      | 0.50      | 376    | 15.00   | 1.54184        | 45           | 0.7          | 99.99     |
| Omega | 40.000  | 92.00          | -58.36       | 58.00      | 54.50      | 0.50      | 264    | 15.00   | 1.54184        | 45           | 0.7          | 99.99     |
| Phi   | 40.000  | -36.00         | -70.00       | -356.78    | 54.50      | 0.50      | 731    | 15.00   | 1.54184        | 45           | 0.7          | 99.99     |
| Phi   | 40.000  | 96.00          | 58.00        | -263.48    | 54.50      | 0.50      | 404    | 15.00   | 1.54184        | 45           | 0.7          | 99.99     |
| Omega | 40.000  | -42.00         | 140.30       | -112.00    | 54.50      | 0.50      | 134    | 15.00   | 1.54184        | 45           | 0.7          | 99.99     |
| Omega | 40.000  | 94.00          | -51.91       | -220.00    | 54.50      | 0.50      | 159    | 15.00   | 1.54184        | 45           | 0.7          | 99.99     |
| Phi   | 40.000  | -78.00         | -            | 17.40      | 54.50      | 0.50      | 184    | 15.00   | 1.54184        | 45           | 0.7          | 99.99     |

A total of 4803 frames were collected. The total exposure time was 20.01 hours. The integration of the data using a triclinic unit cell yielded a total of 10058 reflections to a maximum  $\theta$  angle of  $66.41^\circ$  ( $0.84 \text{ \AA}$  resolution), of which 4173 were independent (average redundancy 2.410, completeness = 88.2%,  $R_{\text{int}} = 2.00\%$ ,  $R_{\text{sig}} = 2.59\%$ ) and 3877 (92.91%) were greater than  $2\sigma(F^2)$ . The final cell constants of  $a = 9.9071(12) \text{ \AA}$ ,  $b = 11.3675(11) \text{ \AA}$ ,  $c = 12.9176(19) \text{ \AA}$ ,  $\alpha = 84.179(11)^\circ$ ,  $\beta = 69.191(11)^\circ$ ,  $\gamma = 80.417(8)^\circ$ , volume =  $1339.5(3) \text{ \AA}^3$ , are based upon the refinement of the XYZ-centroids of 238 reflections above  $20 \sigma(I)$  with  $51.12^\circ < 2\theta < 126.3^\circ$ . Data were corrected for absorption effects using the multi-scan method (SADABS). The ratio of minimum to maximum apparent transmission was 0.814. The calculated minimum and maximum transmission coefficients (based on crystal size) are 0.6900 and 0.8938.

The structure was solved and refined using the Bruker SHELXTL Software Package, using the space group P -1, with  $Z = 2$  for the formula unit,  $\text{C}_{31}\text{H}_{27}\text{CINNiO}_3\text{P}$ . The final anisotropic full-matrix least-squares refinement on  $F^2$  with 344 variables converged at  $R1 = 2.68\%$ , for the observed data and  $wR2 = 7.05\%$  for all data. The goodness-of-fit was 0.894. The largest peak in the final difference electron density synthesis was  $0.346 \text{ e}/\text{\AA}^3$  and the largest hole was  $-0.314 \text{ e}/\text{\AA}^3$  with an RMS deviation of  $0.049 \text{ e}/\text{\AA}^3$ . On the basis of the final model, the calculated density was  $1.455 \text{ g}/\text{cm}^3$  and  $F(000)$ , 608  $e^-$ .

**Table S14. Sample and crystal data for 3.**

|                               |                                                     |                             |
|-------------------------------|-----------------------------------------------------|-----------------------------|
| <b>Identification code</b>    | PDJKW2                                              |                             |
| <b>Chemical formula</b>       | $\text{C}_{31}\text{H}_{27}\text{CINNiO}_3\text{P}$ |                             |
| <b>Formula weight</b>         | 586.67                                              |                             |
| <b>Temperature</b>            | 100(2) K                                            |                             |
| <b>Wavelength</b>             | 1.54178 $\text{\AA}$                                |                             |
| <b>Crystal size</b>           | 0.040 x 0.130 x 0.140 mm                            |                             |
| <b>Crystal habit</b>          | translucent dark purple-brown irregular rod         |                             |
| <b>Crystal system</b>         | triclinic                                           |                             |
| <b>Space group</b>            | P -1                                                |                             |
| <b>Unit cell dimensions</b>   | $a = 9.9071(12) \text{ \AA}$                        | $\alpha = 84.179(11)^\circ$ |
|                               | $b = 11.3675(11) \text{ \AA}$                       | $\beta = 69.191(11)^\circ$  |
|                               | $c = 12.9176(19) \text{ \AA}$                       | $\gamma = 80.417(8)^\circ$  |
| <b>Volume</b>                 | $1339.5(3) \text{ \AA}^3$                           |                             |
| <b>Z</b>                      | 2                                                   |                             |
| <b>Density (calculated)</b>   | $1.455 \text{ Mg}/\text{cm}^3$                      |                             |
| <b>Absorption coefficient</b> | $2.803 \text{ mm}^{-1}$                             |                             |
| <b>F(000)</b>                 | 608                                                 |                             |

**Table S15. Data collection and structure refinement for 3.**

|                                     |                                                                           |                              |
|-------------------------------------|---------------------------------------------------------------------------|------------------------------|
| Theta range for data collection     | 3.66 to 66.41°                                                            |                              |
| Index ranges                        | -11<=h<=11, -13<=k<=13, -15<=l<=15                                        |                              |
| Reflections collected               | 10058                                                                     |                              |
| Independent reflections             | 4173 [R(int) = 0.0200]                                                    |                              |
| Coverage of independent reflections | 88.2%                                                                     |                              |
| Absorption correction               | multi-scan                                                                |                              |
| Max. and min. transmission          | 0.8938 and 0.6900                                                         |                              |
| Structure solution technique        | direct methods                                                            |                              |
| Structure solution program          | SHELXS-97 (Sheldrick, 2008)                                               |                              |
| Refinement method                   | Full-matrix least-squares on F <sup>2</sup>                               |                              |
| Refinement program                  | SHELXL-97 (Sheldrick, 2008)                                               |                              |
| Function minimized                  | $\sum w(F_o^2 - F_c^2)^2$                                                 |                              |
| Data / restraints / parameters      | 4173 / 0 / 344                                                            |                              |
| Goodness-of-fit on F <sup>2</sup>   | 0.894                                                                     |                              |
| $\Delta/\sigma_{\max}$              | 0.003                                                                     |                              |
| Final R indices                     | 3877 data;<br>l>2σ(l)                                                     | R1 = 0.0268, wR2 =<br>0.0686 |
|                                     | all data                                                                  | R1 = 0.0293, wR2 =<br>0.0705 |
| Weighting scheme                    | $w=1/[\sigma^2(F_o^2)+(0.0401P)^2+1.2823P]$<br>where $P=(F_o^2+2F_c^2)/3$ |                              |
| Largest diff. peak and hole         | 0.346 and -0.314 eÅ <sup>-3</sup>                                         |                              |
| R.M.S. deviation from mean          | 0.049 eÅ <sup>-3</sup>                                                    |                              |

**Table S16. Atomic coordinates and equivalent isotropic atomic displacement parameters (Å<sup>2</sup>) for 3.**

U(eq) is defined as one third of the trace of the orthogonalized U<sub>ij</sub> tensor.

|     | x/a         | y/b         | z/c         | U(eq)       |
|-----|-------------|-------------|-------------|-------------|
| Ni1 | 0.49238(3)  | 0.67105(2)  | 0.67650(2)  | 0.01497(10) |
| Cl1 | 0.59741(5)  | 0.48308(3)  | 0.68433(3)  | 0.01926(11) |
| P1  | 0.64215(5)  | 0.76979(4)  | 0.70903(3)  | 0.01418(11) |
| O1  | 0.22502(15) | 0.04028(11) | 0.65560(11) | 0.0259(3)   |
| O2  | 0.09459(15) | 0.01141(12) | 0.83872(11) | 0.0268(3)   |
| O3  | 0.24270(14) | 0.50264(11) | 0.72720(10) | 0.0210(3)   |
| N1  | 0.25139(16) | 0.85883(13) | 0.74717(12) | 0.0186(3)   |
| C1  | 0.35063(19) | 0.80126(16) | 0.64832(14) | 0.0174(4)   |
| C2  | 0.1936(2)   | 0.97786(16) | 0.73870(15) | 0.0205(4)   |

|            | <b>x/a</b>  | <b>y/b</b>  | <b>z/c</b>  | <b>U(eq)</b> |
|------------|-------------|-------------|-------------|--------------|
| <b>C3</b>  | 0.0086(2)   | 0.12383(17) | 0.83994(15) | 0.0217(4)    |
| <b>C4</b>  | 0.0634(2)   | 0.22662(17) | 0.84240(16) | 0.0247(4)    |
| <b>C5</b>  | 0.9737(2)   | 0.33518(17) | 0.84862(16) | 0.0249(4)    |
| <b>C6</b>  | 0.8318(2)   | 0.33954(17) | 0.85240(15) | 0.0237(4)    |
| <b>C7</b>  | 0.7786(2)   | 0.23481(19) | 0.85044(18) | 0.0309(5)    |
| <b>C8</b>  | 0.8670(2)   | 0.12564(18) | 0.84466(17) | 0.0287(5)    |
| <b>C9</b>  | 0.20128(19) | 0.78507(16) | 0.84099(15) | 0.0198(4)    |
| <b>C10</b> | 0.21892(19) | 0.66648(16) | 0.83172(15) | 0.0195(4)    |
| <b>C11</b> | 0.26823(19) | 0.61570(16) | 0.72368(15) | 0.0179(4)    |
| <b>C12</b> | 0.2803(2)   | 0.44956(18) | 0.62225(16) | 0.0285(5)    |
| <b>C13</b> | 0.31977(19) | 0.68791(16) | 0.62812(15) | 0.0179(4)    |
| <b>C14</b> | 0.82476(19) | 0.76863(15) | 0.60556(14) | 0.0159(4)    |
| <b>C15</b> | 0.9125(2)   | 0.85593(16) | 0.59718(15) | 0.0199(4)    |
| <b>C16</b> | 0.0534(2)   | 0.84686(16) | 0.52033(16) | 0.0221(4)    |
| <b>C17</b> | 0.1065(2)   | 0.75214(17) | 0.45045(15) | 0.0230(4)    |
| <b>C18</b> | 0.0200(2)   | 0.66529(17) | 0.45856(15) | 0.0235(4)    |
| <b>C19</b> | 0.8794(2)   | 0.67309(16) | 0.53650(15) | 0.0192(4)    |
| <b>C20</b> | 0.67675(19) | 0.71140(15) | 0.83597(14) | 0.0166(4)    |
| <b>C21</b> | 0.8089(2)   | 0.71355(17) | 0.85029(16) | 0.0237(4)    |
| <b>C22</b> | 0.8288(2)   | 0.66946(19) | 0.94886(16) | 0.0268(4)    |
| <b>C23</b> | 0.7178(2)   | 0.62258(16) | 0.03341(15) | 0.0219(4)    |
| <b>C24</b> | 0.5864(2)   | 0.61838(15) | 0.01976(15) | 0.0206(4)    |
| <b>C25</b> | 0.5661(2)   | 0.66214(15) | 0.92111(14) | 0.0184(4)    |
| <b>C26</b> | 0.57810(18) | 0.92875(15) | 0.73213(14) | 0.0159(4)    |
| <b>C27</b> | 0.5110(2)   | 0.97165(16) | 0.83874(15) | 0.0202(4)    |
| <b>C28</b> | 0.4586(2)   | 0.09191(16) | 0.85316(16) | 0.0226(4)    |
| <b>C29</b> | 0.4727(2)   | 0.17104(16) | 0.76216(15) | 0.0204(4)    |
| <b>C30</b> | 0.5363(2)   | 0.12833(16) | 0.65684(15) | 0.0218(4)    |
| <b>C31</b> | 0.5878(2)   | 0.00820(16) | 0.64108(15) | 0.0206(4)    |



Table S17. Bond lengths (Å) for 3.

|                 |            |                 |            |
|-----------------|------------|-----------------|------------|
| <b>Ni1-C1</b>   | 1.9640(17) | <b>Ni1-C13</b>  | 1.9943(18) |
| <b>Ni1-P1</b>   | 2.1752(6)  | <b>Ni1-Cl1</b>  | 2.2247(5)  |
| <b>Ni1-C11</b>  | 2.2638(18) | <b>P1-C14</b>   | 1.8267(18) |
| <b>P1-C20</b>   | 1.8302(18) | <b>P1-C26</b>   | 1.8303(17) |
| <b>O1-C2</b>    | 1.198(2)   | <b>O2-C2</b>    | 1.361(2)   |
| <b>O2-C3</b>    | 1.411(2)   | <b>O3-C11</b>   | 1.344(2)   |
| <b>O3-C12</b>   | 1.440(2)   | <b>N1-C9</b>    | 1.387(2)   |
| <b>N1-C2</b>    | 1.388(2)   | <b>N1-C1</b>    | 1.445(2)   |
| <b>C1-C13</b>   | 1.441(3)   | <b>C1-H1</b>    | 1.0        |
| <b>C3-C4</b>    | 1.375(3)   | <b>C3-C8</b>    | 1.379(3)   |
| <b>C4-C5</b>    | 1.387(3)   | <b>C4-H4</b>    | 0.95       |
| <b>C5-C6</b>    | 1.382(3)   | <b>C5-H5</b>    | 0.95       |
| <b>C6-C7</b>    | 1.385(3)   | <b>C6-H6</b>    | 0.95       |
| <b>C7-C8</b>    | 1.387(3)   | <b>C7-H7</b>    | 0.95       |
| <b>C8-H8</b>    | 0.95       | <b>C9-C10</b>   | 1.342(3)   |
| <b>C9-H9</b>    | 0.95       | <b>C10-C11</b>  | 1.451(3)   |
| <b>C10-H10</b>  | 0.95       | <b>C11-C13</b>  | 1.394(3)   |
| <b>C12-H12A</b> | 0.98       | <b>C12-H12B</b> | 0.98       |
| <b>C12-H12C</b> | 0.98       | <b>C13-H13</b>  | 0.95       |
| <b>C14-C19</b>  | 1.388(3)   | <b>C14-C15</b>  | 1.397(3)   |
| <b>C15-C16</b>  | 1.390(3)   | <b>C15-H15</b>  | 0.95       |
| <b>C16-C17</b>  | 1.386(3)   | <b>C16-H16</b>  | 0.95       |
| <b>C17-C18</b>  | 1.385(3)   | <b>C17-H17</b>  | 0.95       |
| <b>C18-C19</b>  | 1.393(3)   | <b>C18-H18</b>  | 0.95       |
| <b>C19-H19</b>  | 0.95       | <b>C20-C21</b>  | 1.390(3)   |
| <b>C20-C25</b>  | 1.395(3)   | <b>C21-C22</b>  | 1.389(3)   |
| <b>C21-H21</b>  | 0.95       | <b>C22-C23</b>  | 1.382(3)   |
| <b>C22-H22</b>  | 0.95       | <b>C23-C24</b>  | 1.383(3)   |
| <b>C23-H23</b>  | 0.95       | <b>C24-C25</b>  | 1.390(3)   |
| <b>C24-H24</b>  | 0.95       | <b>C25-H25</b>  | 0.95       |
| <b>C26-C31</b>  | 1.393(3)   | <b>C26-C27</b>  | 1.398(3)   |
| <b>C27-C28</b>  | 1.385(3)   | <b>C27-H27</b>  | 0.95       |
| <b>C28-C29</b>  | 1.386(3)   | <b>C28-H28</b>  | 0.95       |
| <b>C29-C30</b>  | 1.381(3)   | <b>C29-H29</b>  | 0.95       |
| <b>C30-C31</b>  | 1.385(3)   | <b>C30-H30</b>  | 0.95       |
| <b>C31-H31</b>  | 0.95       |                 |            |

Table S18. Bond angles (°) for 3.

|                      |            |                      |            |
|----------------------|------------|----------------------|------------|
| <b>C1-Ni1-C13</b>    | 42.70(7)   | <b>C1-Ni1-P1</b>     | 101.51(6)  |
| <b>C13-Ni1-P1</b>    | 143.90(5)  | <b>C1-Ni1-C11</b>    | 156.14(6)  |
| <b>C13-Ni1-C11</b>   | 113.45(5)  | <b>P1-Ni1-C11</b>    | 102.12(2)  |
| <b>C1-Ni1-C11</b>    | 68.03(7)   | <b>C13-Ni1-C11</b>   | 37.56(7)   |
| <b>P1-Ni1-C11</b>    | 150.44(5)  | <b>C11-Ni1-C11</b>   | 92.47(5)   |
| <b>C14-P1-C20</b>    | 103.57(8)  | <b>C14-P1-C26</b>    | 103.44(8)  |
| <b>C20-P1-C26</b>    | 103.94(8)  | <b>C14-P1-Ni1</b>    | 117.84(6)  |
| <b>C20-P1-Ni1</b>    | 111.00(6)  | <b>C26-P1-Ni1</b>    | 115.49(6)  |
| <b>C2-O2-C3</b>      | 116.34(14) | <b>C11-O3-C12</b>    | 116.62(14) |
| <b>C9-N1-C2</b>      | 123.63(15) | <b>C9-N1-C1</b>      | 116.47(14) |
| <b>C2-N1-C1</b>      | 118.96(14) | <b>C13-C1-N1</b>     | 116.52(15) |
| <b>C13-C1-Ni1</b>    | 69.77(10)  | <b>N1-C1-Ni1</b>     | 113.83(12) |
| <b>C13-C1-H1</b>     | 116.2      | <b>N1-C1-H1</b>      | 116.2      |
| <b>Ni1-C1-H1</b>     | 116.2      | <b>O1-C2-O2</b>      | 125.62(16) |
| <b>O1-C2-N1</b>      | 124.97(17) | <b>O2-C2-N1</b>      | 109.40(15) |
| <b>C4-C3-C8</b>      | 121.91(17) | <b>C4-C3-O2</b>      | 120.38(17) |
| <b>C8-C3-O2</b>      | 117.62(17) | <b>C3-C4-C5</b>      | 118.86(18) |
| <b>C3-C4-H4</b>      | 120.6      | <b>C5-C4-H4</b>      | 120.6      |
| <b>C6-C5-C4</b>      | 120.37(19) | <b>C6-C5-H5</b>      | 119.8      |
| <b>C4-C5-H5</b>      | 119.8      | <b>C5-C6-C7</b>      | 119.80(18) |
| <b>C5-C6-H6</b>      | 120.1      | <b>C7-C6-H6</b>      | 120.1      |
| <b>C6-C7-C8</b>      | 120.38(19) | <b>C6-C7-H7</b>      | 119.8      |
| <b>C8-C7-H7</b>      | 119.8      | <b>C3-C8-C7</b>      | 118.67(19) |
| <b>C3-C8-H8</b>      | 120.7      | <b>C7-C8-H8</b>      | 120.7      |
| <b>C10-C9-N1</b>     | 119.84(17) | <b>C10-C9-H9</b>     | 120.1      |
| <b>N1-C9-H9</b>      | 120.1      | <b>C9-C10-C11</b>    | 120.72(16) |
| <b>C9-C10-H10</b>    | 119.6      | <b>C11-C10-H10</b>   | 119.6      |
| <b>O3-C11-C13</b>    | 125.95(16) | <b>O3-C11-C10</b>    | 113.81(15) |
| <b>C13-C11-C10</b>   | 119.78(17) | <b>O3-C11-Ni1</b>    | 124.58(12) |
| <b>C13-C11-Ni1</b>   | 60.68(10)  | <b>C10-C11-Ni1</b>   | 92.61(12)  |
| <b>O3-C12-H12A</b>   | 109.5      | <b>O3-C12-H12B</b>   | 109.5      |
| <b>H12A-C12-H12B</b> | 109.5      | <b>O3-C12-H12C</b>   | 109.5      |
| <b>H12A-C12-H12C</b> | 109.5      | <b>H12B-C12-H12C</b> | 109.5      |
| <b>C11-C13-C1</b>    | 113.97(16) | <b>C11-C13-Ni1</b>   | 81.76(11)  |
| <b>C1-C13-Ni1</b>    | 67.53(10)  | <b>C11-C13-H13</b>   | 123.0      |
| <b>C1-C13-H13</b>    | 123.0      | <b>Ni1-C13-H13</b>   | 118.8      |
| <b>C19-C14-C15</b>   | 119.43(17) | <b>C19-C14-P1</b>    | 117.63(14) |

|                    |            |                    |            |
|--------------------|------------|--------------------|------------|
| <b>C15-C14-P1</b>  | 122.87(13) | <b>C16-C15-C14</b> | 120.15(17) |
| <b>C16-C15-H15</b> | 119.9      | <b>C14-C15-H15</b> | 119.9      |
| <b>C17-C16-C15</b> | 120.10(19) | <b>C17-C16-H16</b> | 119.9      |
| <b>C15-C16-H16</b> | 119.9      | <b>C18-C17-C16</b> | 119.95(17) |
| <b>C18-C17-H17</b> | 120.0      | <b>C16-C17-H17</b> | 120.0      |
| <b>C17-C18-C19</b> | 120.16(18) | <b>C17-C18-H18</b> | 119.9      |
| <b>C19-C18-H18</b> | 119.9      | <b>C14-C19-C18</b> | 120.20(18) |
| <b>C14-C19-H19</b> | 119.9      | <b>C18-C19-H19</b> | 119.9      |
| <b>C21-C20-C25</b> | 118.98(16) | <b>C21-C20-P1</b>  | 122.56(14) |
| <b>C25-C20-P1</b>  | 118.46(14) | <b>C22-C21-C20</b> | 120.26(18) |
| <b>C22-C21-H21</b> | 119.9      | <b>C20-C21-H21</b> | 119.9      |
| <b>C23-C22-C21</b> | 120.33(19) | <b>C23-C22-H22</b> | 119.8      |
| <b>C21-C22-H22</b> | 119.8      | <b>C22-C23-C24</b> | 120.04(17) |
| <b>C22-C23-H23</b> | 120.0      | <b>C24-C23-H23</b> | 120.0      |
| <b>C23-C24-C25</b> | 119.78(17) | <b>C23-C24-H24</b> | 120.1      |
| <b>C25-C24-H24</b> | 120.1      | <b>C24-C25-C20</b> | 120.59(17) |
| <b>C24-C25-H25</b> | 119.7      | <b>C20-C25-H25</b> | 119.7      |
| <b>C31-C26-C27</b> | 118.94(16) | <b>C31-C26-P1</b>  | 119.11(13) |
| <b>C27-C26-P1</b>  | 121.82(13) | <b>C28-C27-C26</b> | 120.30(17) |
| <b>C28-C27-H27</b> | 119.9      | <b>C26-C27-H27</b> | 119.9      |
| <b>C27-C28-C29</b> | 120.42(17) | <b>C27-C28-H28</b> | 119.8      |
| <b>C29-C28-H28</b> | 119.8      | <b>C30-C29-C28</b> | 119.30(16) |
| <b>C30-C29-H29</b> | 120.3      | <b>C28-C29-H29</b> | 120.3      |
| <b>C29-C30-C31</b> | 120.95(17) | <b>C29-C30-H30</b> | 119.5      |
| <b>C31-C30-H30</b> | 119.5      | <b>C30-C31-C26</b> | 120.04(17) |
| <b>C30-C31-H31</b> | 120.0      | <b>C26-C31-H31</b> | 120.0      |

**Table S19. Anisotropic atomic displacement parameters (Å<sup>2</sup>) for 3.**

The anisotropic atomic displacement factor exponent takes the form:

$$-2\pi^2 [ h^2 a^{*2} U_{11} + \dots + 2 h k a^* b^* U_{12} ]$$

|            | <b>U<sub>11</sub></b> | <b>U<sub>22</sub></b> | <b>U<sub>33</sub></b> | <b>U<sub>23</sub></b> | <b>U<sub>13</sub></b> | <b>U<sub>12</sub></b> |
|------------|-----------------------|-----------------------|-----------------------|-----------------------|-----------------------|-----------------------|
| <b>Ni1</b> | 0.01495(16)           | 0.01328(16)           | 0.01642(17)           | -0.00066(11)          | -0.00521(12)          | -0.00171(12)          |
| <b>Cl1</b> | 0.0192(2)             | 0.0139(2)             | 0.0225(2)             | 0.00004(15)           | -0.00563(17)          | -0.00048(16)          |
| <b>P1</b>  | 0.0146(2)             | 0.0129(2)             | 0.0141(2)             | -0.00044(16)          | -0.00390(18)          | -0.00192(17)          |
| <b>O1</b>  | 0.0277(7)             | 0.0196(7)             | 0.0252(7)             | 0.0014(6)             | -0.0055(6)            | 0.0016(6)             |
| <b>O2</b>  | 0.0282(7)             | 0.0211(7)             | 0.0229(7)             | -0.0028(5)            | -0.0028(6)            | 0.0071(6)             |
| <b>O3</b>  | 0.0243(7)             | 0.0206(6)             | 0.0206(7)             | 0.0006(5)             | -0.0087(5)            | -0.0090(5)            |
| <b>N1</b>  | 0.0172(8)             | 0.0184(8)             | 0.0185(8)             | -0.0014(6)            | -0.0054(6)            | 0.0009(6)             |
| <b>C1</b>  | 0.0167(9)             | 0.0190(9)             | 0.0149(9)             | -0.0002(7)            | -0.0046(7)            | 0.0000(7)             |
| <b>C2</b>  | 0.0176(9)             | 0.0196(9)             | 0.0235(10)            | -0.0034(8)            | -0.0070(8)            | 0.0007(8)             |
| <b>C3</b>  | 0.0221(10)            | 0.0202(9)             | 0.0184(9)             | -0.0039(7)            | -0.0044(8)            | 0.0055(8)             |
| <b>C4</b>  | 0.0164(9)             | 0.0264(10)            | 0.0307(11)            | -0.0032(8)            | -0.0076(8)            | -0.0015(8)            |
| <b>C5</b>  | 0.0247(10)            | 0.0203(9)             | 0.0284(10)            | -0.0033(8)            | -0.0065(8)            | -0.0043(8)            |
| <b>C6</b>  | 0.0232(10)            | 0.0235(10)            | 0.0221(10)            | -0.0061(7)            | -0.0076(8)            | 0.0057(8)             |
| <b>C7</b>  | 0.0190(10)            | 0.0352(12)            | 0.0404(12)            | -0.0140(9)            | -0.0125(9)            | 0.0030(9)             |
| <b>C8</b>  | 0.0252(11)            | 0.0254(10)            | 0.0354(12)            | -0.0120(8)            | -0.0071(9)            | -0.0039(9)            |
| <b>C9</b>  | 0.0168(9)             | 0.0234(10)            | 0.0167(9)             | -0.0006(7)            | -0.0044(7)            | 0.0006(8)             |
| <b>C10</b> | 0.0166(9)             | 0.0225(9)             | 0.0175(9)             | 0.0021(7)             | -0.0047(7)            | -0.0018(7)            |
| <b>C11</b> | 0.0140(8)             | 0.0190(9)             | 0.0220(9)             | -0.0004(7)            | -0.0080(7)            | -0.0023(7)            |
| <b>C12</b> | 0.0435(12)            | 0.0244(10)            | 0.0229(10)            | -0.0025(8)            | -0.0149(9)            | -0.0105(9)            |
| <b>C13</b> | 0.0156(9)             | 0.0218(9)             | 0.0166(9)             | -0.0003(7)            | -0.0069(7)            | -0.0012(7)            |
| <b>C14</b> | 0.0155(9)             | 0.0165(8)             | 0.0152(9)             | 0.0020(7)             | -0.0060(7)            | -0.0012(7)            |
| <b>C15</b> | 0.0206(9)             | 0.0161(9)             | 0.0212(9)             | 0.0002(7)             | -0.0052(8)            | -0.0028(8)            |
| <b>C16</b> | 0.0189(9)             | 0.0179(9)             | 0.0282(10)            | 0.0048(7)             | -0.0071(8)            | -0.0050(8)            |
| <b>C17</b> | 0.0167(9)             | 0.0264(10)            | 0.0207(10)            | 0.0035(7)             | -0.0022(8)            | -0.0017(8)            |
| <b>C18</b> | 0.0220(10)            | 0.0255(10)            | 0.0200(10)            | -0.0058(7)            | -0.0038(8)            | -0.0001(8)            |
| <b>C19</b> | 0.0198(9)             | 0.0192(9)             | 0.0193(9)             | -0.0026(7)            | -0.0065(8)            | -0.0043(8)            |
| <b>C20</b> | 0.0194(9)             | 0.0132(8)             | 0.0158(9)             | -0.0021(6)            | -0.0052(7)            | 0.0004(7)             |
| <b>C21</b> | 0.0184(9)             | 0.0302(10)            | 0.0212(10)            | 0.0021(8)             | -0.0052(8)            | -0.0050(8)            |
| <b>C22</b> | 0.0207(10)            | 0.0361(11)            | 0.0249(10)            | -0.0009(8)            | -0.0112(8)            | -0.0004(9)            |
| <b>C23</b> | 0.0285(10)            | 0.0179(9)             | 0.0181(9)             | -0.0022(7)            | -0.0093(8)            | 0.0040(8)             |
| <b>C24</b> | 0.0270(10)            | 0.0142(8)             | 0.0174(9)             | -0.0005(7)            | -0.0038(8)            | -0.0030(7)            |
| <b>C25</b> | 0.0187(9)             | 0.0168(9)             | 0.0199(9)             | -0.0012(7)            | -0.0067(8)            | -0.0028(7)            |
| <b>C26</b> | 0.0136(8)             | 0.0154(8)             | 0.0189(9)             | -0.0020(7)            | -0.0051(7)            | -0.0033(7)            |
| <b>C27</b> | 0.0237(10)            | 0.0189(9)             | 0.0177(9)             | 0.0003(7)             | -0.0072(8)            | -0.0033(8)            |

|            | <b>U<sub>11</sub></b> | <b>U<sub>22</sub></b> | <b>U<sub>33</sub></b> | <b>U<sub>23</sub></b> | <b>U<sub>13</sub></b> | <b>U<sub>12</sub></b> |
|------------|-----------------------|-----------------------|-----------------------|-----------------------|-----------------------|-----------------------|
| <b>C28</b> | 0.0257(10)            | 0.0210(9)             | 0.0210(10)            | -0.0071(7)            | -0.0074(8)            | -0.0008(8)            |
| <b>C29</b> | 0.0194(9)             | 0.0143(9)             | 0.0271(10)            | -0.0028(7)            | -0.0072(8)            | -0.0020(7)            |
| <b>C30</b> | 0.0239(10)            | 0.0175(9)             | 0.0214(10)            | 0.0043(7)             | -0.0055(8)            | -0.0046(8)            |
| <b>C31</b> | 0.0221(10)            | 0.0191(9)             | 0.0172(9)             | -0.0022(7)            | -0.0033(8)            | -0.0007(8)            |

**Table S20. Hydrogen atomic coordinates and isotropic atomic displacement parameters ( $\text{\AA}^2$ ) for 3.**

|             | <b>x/a</b> | <b>y/b</b> | <b>z/c</b> | <b>U(eq)</b> |
|-------------|------------|------------|------------|--------------|
| <b>H1</b>   | 0.3889     | 0.8551     | 0.5815     | 0.021        |
| <b>H4</b>   | 0.1609     | 1.2233     | 0.8399     | 0.03         |
| <b>H5</b>   | 0.0100     | 1.4070     | 0.8503     | 0.03         |
| <b>H6</b>   | -0.2292    | 1.4141     | 0.8563     | 0.028        |
| <b>H7</b>   | -0.3189    | 1.2378     | 0.8531     | 0.037        |
| <b>H8</b>   | -0.1692    | 1.0535     | 0.8440     | 0.034        |
| <b>H9</b>   | 0.1546     | 0.8184     | 0.9117     | 0.024        |
| <b>H10</b>  | 0.1989     | 0.6152     | 0.8966     | 0.023        |
| <b>H12A</b> | 0.2243     | 0.4963     | 0.5792     | 0.043        |
| <b>H12B</b> | 0.2574     | 0.3675     | 0.6349     | 0.043        |
| <b>H12C</b> | 0.3848     | 0.4487     | 0.5812     | 0.043        |
| <b>H13</b>  | 0.3333     | 0.6645     | 0.5562     | 0.021        |
| <b>H15</b>  | 0.8759     | 0.9216     | 0.6441     | 0.024        |
| <b>H16</b>  | 1.1134     | 0.9057     | 0.5157     | 0.027        |
| <b>H17</b>  | 1.2021     | 0.7468     | 0.3971     | 0.028        |
| <b>H18</b>  | 1.0565     | 0.6002     | 0.4109     | 0.028        |
| <b>H19</b>  | 0.8208     | 0.6128     | 0.5424     | 0.023        |
| <b>H21</b>  | 0.8858     | 0.7453     | 0.7924     | 0.028        |
| <b>H22</b>  | 0.9192     | 0.6715     | 0.9582     | 0.032        |
| <b>H23</b>  | 0.7317     | 0.5932     | 1.1009     | 0.026        |
| <b>H24</b>  | 0.5102     | 0.5857     | 1.0776     | 0.025        |
| <b>H25</b>  | 0.4762     | 0.6585     | 0.9115     | 0.022        |
| <b>H27</b>  | 0.5012     | 0.9181     | 0.9016     | 0.024        |
| <b>H28</b>  | 0.4128     | 1.1203     | 0.9259     | 0.027        |
| <b>H29</b>  | 0.4389     | 1.2538     | 0.7721     | 0.024        |
| <b>H30</b>  | 0.5448     | 1.1821     | 0.5943     | 0.026        |
| <b>H31</b>  | 0.6298     | 0.9799     | 0.5681     | 0.025        |
